# Supplementary material for: Continuous-flow Fe-zeolite-catalyzed temperature-directed synthesis of bioactive tetraketones and xanthenes using epoxides and cyclic-1,3-diketones via a Meinwald rearrangement
Source: Royal Society of Chemistry journal article supplement (doi:10.1039/d2re00452f), 2022-12-16

|                               |                                 |
|-------------------------------|---------------------------------|
| R(reflections)= 0.1078( 1729) | wR2(reflections)= 0.2744( 1903) |
| S = 1.006                     | Npar= 230                       |

---

The following ALERTS were generated. Each ALERT has the format

**test-name\_ALERT\_alert-type\_alert-level.**

Click on the hyperlinks for more details of the test.

---

### Alert level A

THETM01\_ALERT\_3\_A The value of  $\sin(\theta_{\max})/\lambda$  is less than 0.550

Calculated  $\sin(\theta_{\max})/\lambda = 0.4795$

---

### Alert level B

|                   |                                                 |               |
|-------------------|-------------------------------------------------|---------------|
| PLAT097_ALERT_2_B | Large Reported Max. (Positive) Residual Density | 1.05 eA-3     |
| PLAT230_ALERT_2_B | Hirshfeld Test Diff for C23 --C24               | 10.3 s.u.     |
| PLAT340_ALERT_3_B | Low Bond Precision on C-C Bonds                 | 0.01088 Ang.  |
| PLAT416_ALERT_2_B | Short Intra D-H..H-D H2 ..H3                    | 1.07 Ang.     |
|                   | x,y,z =                                         | 1_555 Check   |
| PLAT921_ALERT_1_B | R1 in the CIF and FCF Differ by                 | -0.0131 Check |
| PLAT922_ALERT_1_B | wR2 in the CIF and FCF Differ by                | -0.0291 Check |

---

### Alert level C

ABSTY02\_ALERT\_1\_C An \_exptl\_absorpt\_correction\_type has been given without a literature citation. This should be contained in the \_exptl\_absorpt\_process\_details field.

Absorption correction given as multi-scan

DIFMN02\_ALERT\_2\_C The minimum difference density is <  $-0.1 \times Z_{\max} \times 0.75$

\_refine\_diff\_density\_min given = -0.623

Test value = -0.600

DIFMN03\_ALERT\_1\_C The minimum difference density is <  $-0.1 \times Z_{\max} \times 0.75$

The relevant atom site should be identified.

DIFMX02\_ALERT\_1\_C The maximum difference density is >  $0.1 \times Z_{\max} \times 0.75$

The relevant atom site should be identified.

SHFSU01\_ALERT\_2\_C The absolute value of parameter shift to su ratio > 0.05

Absolute value of the parameter shift to su ratio given 0.069

Additional refinement cycles may be required.

|                   |                                                  |                |
|-------------------|--------------------------------------------------|----------------|
| PLAT031_ALERT_4_C | Refined Extinction Parameter Within Range of ... | 2.600 Sigma    |
| PLAT080_ALERT_2_C | Maximum Shift/Error                              | 0.07 Why ?     |
| PLAT082_ALERT_2_C | High R1 Value                                    | 0.11 Report    |
| PLAT084_ALERT_3_C | High wR2 Value (i.e. > 0.25)                     | 0.27 Report    |
| PLAT088_ALERT_3_C | Poor Data / Parameter Ratio                      | 8.27 Note      |
| PLAT098_ALERT_2_C | Large Reported Min. (Negative) Residual Density  | -0.62 eA-3     |
| PLAT230_ALERT_2_C | Hirshfeld Test Diff for C18 --C24                | 6.8 s.u.       |
| PLAT241_ALERT_2_C | High 'MainMol' Ueq as Compared to Neighbors of   | C16 Check      |
| PLAT241_ALERT_2_C | High 'MainMol' Ueq as Compared to Neighbors of   | C18 Check      |
| PLAT241_ALERT_2_C | High 'MainMol' Ueq as Compared to Neighbors of   | C20 Check      |
| PLAT241_ALERT_2_C | High 'MainMol' Ueq as Compared to Neighbors of   | C23 Check      |
| PLAT242_ALERT_2_C | Low 'MainMol' Ueq as Compared to Neighbors of    | C10 Check      |
| PLAT242_ALERT_2_C | Low 'MainMol' Ueq as Compared to Neighbors of    | C13 Check      |
| PLAT242_ALERT_2_C | Low 'MainMol' Ueq as Compared to Neighbors of    | C24 Check      |
| PLAT331_ALERT_2_C | Small Aver Phenyl C-C Dist C19 --C24             | 1.36 Ang.      |
| PLAT332_ALERT_2_C | Large Phenyl C-C Range C19 -C24                  | 0.16 Ang.      |
| PLAT360_ALERT_2_C | Short C(sp3)-C(sp3) Bond C9 - C18                | 1.42 Ang.      |
| PLAT906_ALERT_3_C | Large K Value in the Analysis of Variance        | 7.194 Check    |
| PLAT911_ALERT_3_C | Missing FCF Refl Between Thmin & STh/L=          | 0.479 8 Report |
| PLAT923_ALERT_1_C | S Values in the CIF and FCF Differ by            | -0.118 Check   |

|                   |                                                  |       |       |
|-------------------|--------------------------------------------------|-------|-------|
| PLAT939_ALERT_3_C | Large Value of Not (SHELXL) Weight Optimized S . | 10.52 | Check |
| PLAT977_ALERT_2_C | Check Negative Difference Density on H20 .       | -0.32 | eA-3  |
| PLAT977_ALERT_2_C | Check Negative Difference Density on H22 .       | -0.36 | eA-3  |
| PLAT977_ALERT_2_C | Check Negative Difference Density on H23 .       | -0.32 | eA-3  |

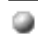

### Alert level G

|                   |                                                  |       |              |
|-------------------|--------------------------------------------------|-------|--------------|
| PLAT007_ALERT_5_G | Number of Unrefined Donor-H Atoms .....          | 2     | Report       |
| PLAT066_ALERT_1_G | Predicted and Reported Tmin&Tmax Range Identical | ?     | Check        |
| PLAT083_ALERT_2_G | SHELXL Second Parameter in WGHT Unusually Large  | 13.53 | Why ?        |
| PLAT171_ALERT_4_G | The CIF-Embedded .res File Contains EADP Records | 2     | Report       |
| PLAT883_ALERT_1_G | No Info/Value for _atom_sites_solution_primary . |       | Please Do !  |
| PLAT909_ALERT_3_G | Percentage of I>2sig(I) Data at Theta(Max) Still | 65%   | Note         |
| PLAT913_ALERT_3_G | Missing # of Very Strong Reflections in FCF .... | 1     | Note         |
| PLAT965_ALERT_2_G | The SHELXL WEIGHT Optimisation has not Converged |       | Please Check |
| PLAT978_ALERT_2_G | Number C-C Bonds with Positive Residual Density. | 3     | Info         |

- 
- 1 **ALERT level A** = Most likely a serious problem - resolve or explain
  - 6 **ALERT level B** = A potentially serious problem, consider carefully
  - 29 **ALERT level C** = Check. Ensure it is not caused by an omission or oversight
  - 9 **ALERT level G** = General information/check it is not something unexpected
- 
- 8 ALERT type 1 CIF construction/syntax error, inconsistent or missing data
  - 25 ALERT type 2 Indicator that the structure model may be wrong or deficient
  - 9 ALERT type 3 Indicator that the structure quality may be low
  - 2 ALERT type 4 Improvement, methodology, query or suggestion
  - 1 ALERT type 5 Informative message, check
-

It is advisable to attempt to resolve as many as possible of the alerts in all categories. Often the minor alerts point to easily fixed oversights, errors and omissions in your CIF or refinement strategy, so attention to these fine details can be worthwhile. In order to resolve some of the more serious problems it may be necessary to carry out additional measurements or structure refinements. However, the purpose of your study may justify the reported deviations and the more serious of these should normally be commented upon in the discussion or experimental section of a paper or in the "special\_details" fields of the CIF. checkCIF was carefully designed to identify outliers and unusual parameters, but every test has its limitations and alerts that are not important in a particular case may appear. Conversely, the absence of alerts does not guarantee there are no aspects of the results needing attention. It is up to the individual to critically assess their own results and, if necessary, seek expert advice.

### **Publication of your CIF in IUCr journals**

A basic structural check has been run on your CIF. These basic checks will be run on all CIFs submitted for publication in IUCr journals (*Acta Crystallographica*, *Journal of Applied Crystallography*, *Journal of Synchrotron Radiation*); however, if you intend to submit to *Acta Crystallographica Section C* or *E* or *IUCrData*, you should make sure that full publication checks are run on the final version of your CIF prior to submission.

### **Publication of your CIF in other journals**

Please refer to the *Notes for Authors* of the relevant journal for any special instructions relating to CIF submission.

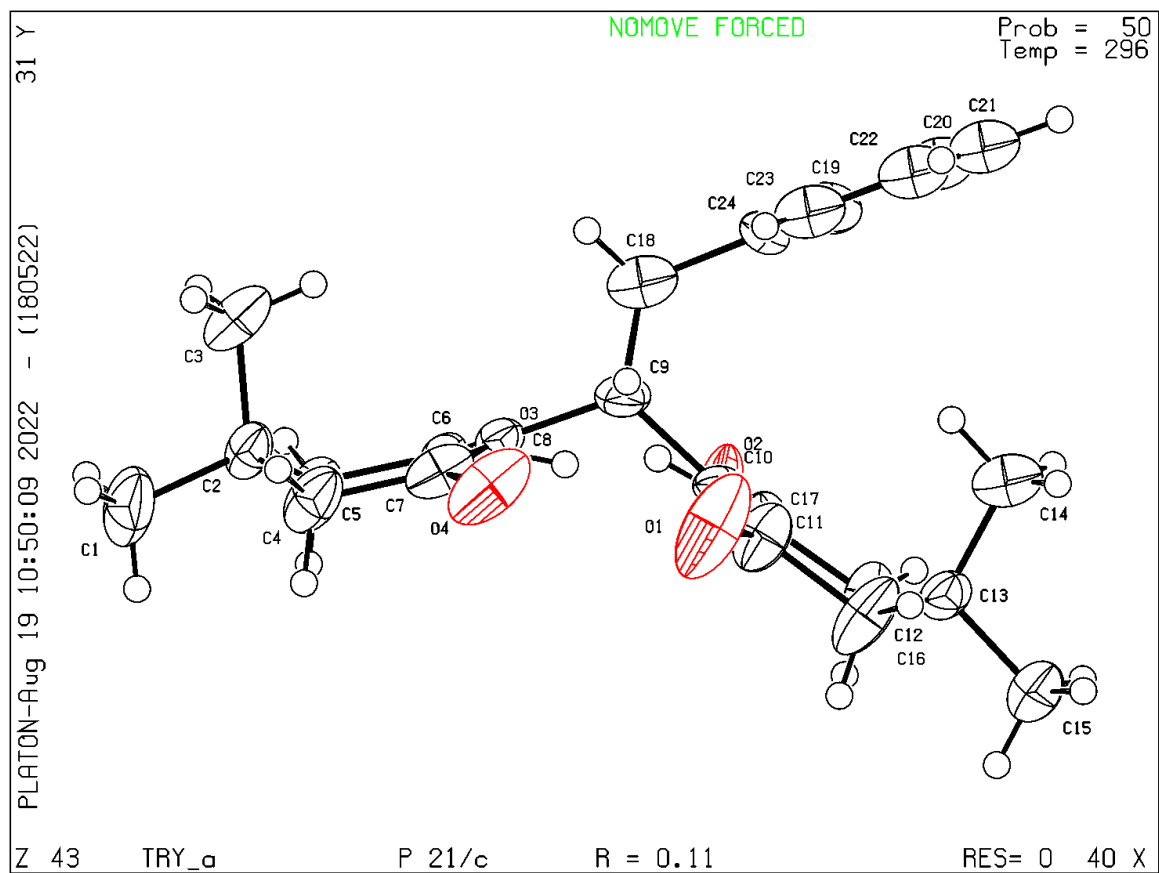

Supplement: d2re00452f1.zip [file d2re00452f1.zip]
