# Supplementary material for: Continuous-flow Fe-zeolite-catalyzed temperature-directed synthesis of bioactive tetraketones and xanthenes using epoxides and cyclic-1,3-diketones via a Meinwald rearrangement
Source: Royal Society of Chemistry journal article supplement (doi:10.1039/d2re00452f), 2022-12-16
Supplement: d2re00452f1.zip [file d2re00452f1.zip]

## Sample Information

|                |                |                    |                                                                                             |
|----------------|----------------|--------------------|---------------------------------------------------------------------------------------------|
| Name           | MSB_BK_SJM_127 | Data File Path     | D:\MassHunter\Data\JUNE-22\MSB_BK_SJM_127.d                                                 |
| Sample ID      |                | Acq. Time (Local)  | 17-06-2022 6.08.54 PM (UTC+05:30)                                                           |
| Instrument     | LCMS QTOF      | Method Path (Acq)  | D:\MassHunter\Methods\6545XT checkout\Methods\TRAINING\MS SCAN_AB_POS_100-600_4000-500-80.m |
| MS Type        | QTOF           | Version (Acq SW)   | 6200 series TOF/6500 series Q-TOF B.09.00 (B9044.0)                                         |
| Inj. Vol. (ul) | 1              | IRM Status         | Success                                                                                     |
| Position       | P1-D11         | Method Path (DA)   | D:\MassHunter\Report Templates\REPORT METHOD\HRMS.m                                         |
| Plate Pos.     |                | Target Source Path |                                                                                             |
| Operator       |                | Result Summary     | 1 qualified (1 targets)                                                                     |

## Sample Spectra

+ Scan (rt: 0.249-0.430 min)

Peak 1 from + TIC Scan

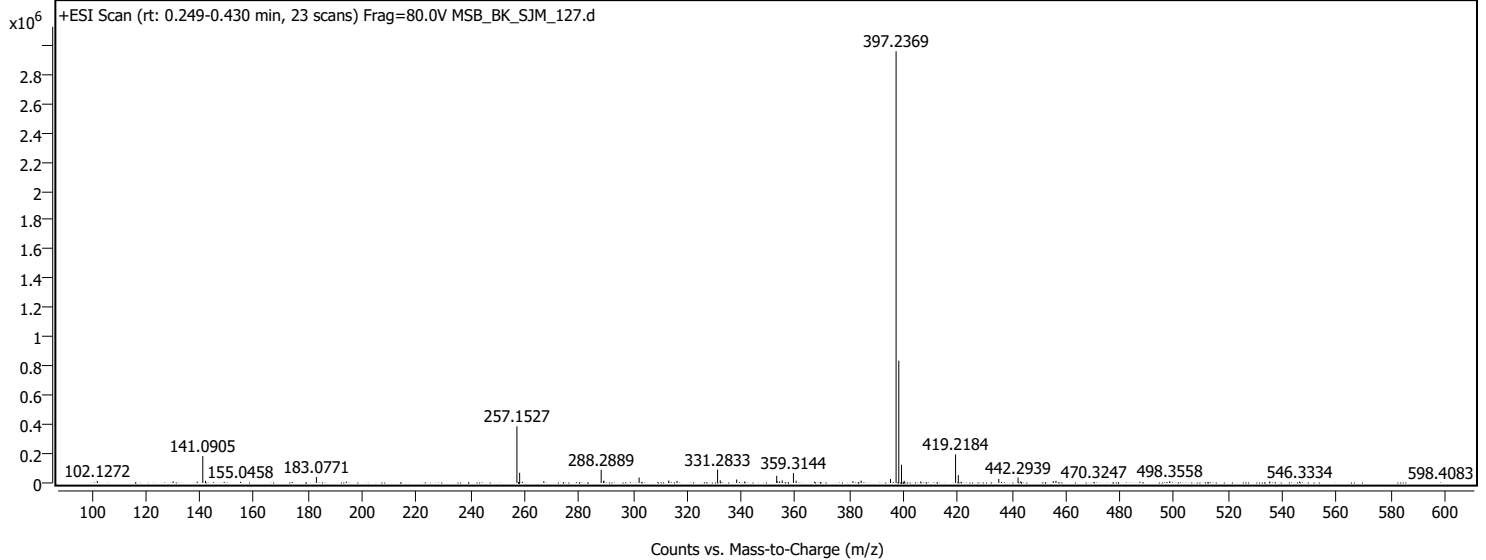

## Compound Details

Cpd. 1: C25 H32 O4

| Formula    | m/z      | Observed M/Z     | Difference Da      | Difference PPM    | Score |
|------------|----------|------------------|--------------------|-------------------|-------|
| C25 H32 O4 | 397.2369 | 397.236935914919 | -0.532287161490785 | -1.34337905142543 | 98.96 |

Compound Spectra (Zoomed)

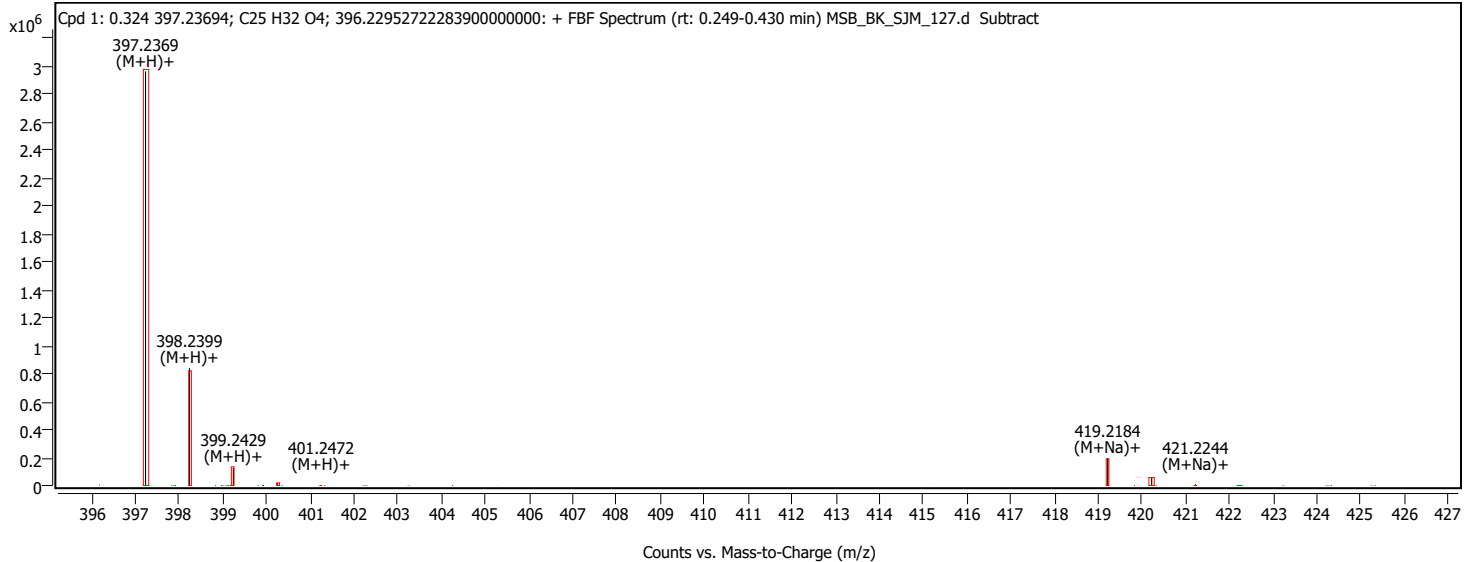MassHunter Qual 10.0  
(End of Report)
