# Supplementary material for: Continuous-flow Fe-zeolite-catalyzed temperature-directed synthesis of bioactive tetraketones and xanthenes using epoxides and cyclic-1,3-diketones via a Meinwald rearrangement
Source: Royal Society of Chemistry journal article supplement (doi:10.1039/d2re00452f), 2022-12-16
Supplement: d2re00452f1.zip [file d2re00452f1.zip]

## Sample Information

|                |                |                    |                                                                                             |
|----------------|----------------|--------------------|---------------------------------------------------------------------------------------------|
| Name           | MSB_BK_SJM_210 | Data File Path     | D:\MassHunter\Data\JUNE-22\MSB_BK_SJM_210.d                                                 |
| Sample ID      |                | Acq. Time (Local)  | 17-06-2022 6.01.31 PM (UTC+05:30)                                                           |
| Instrument     | LCMS QTOF      | Method Path (Acq)  | D:\MassHunter\Methods\6545XT checkout\Methods\TRAINING\MS SCAN_AB_POS_100-600_4000-500-80.m |
| MS Type        | QTOF           | Version (Acq SW)   | 6200 series TOF/6500 series Q-TOF B.09.00 (B9044.0)                                         |
| Inj. Vol. (ul) | 1              | IRM Status         | Success                                                                                     |
| Position       | P1-D9          | Method Path (DA)   | D:\MassHunter\Report Templates\REPORT METHOD\HRMS.m                                         |
| Plate Pos.     |                | Target Source Path |                                                                                             |
| Operator       |                | Result Summary     | 1 qualified (1 targets)                                                                     |

## Sample Spectra

## + Scan (rt: 0.240-0.461 min)

## Peak 1 from + TIC Scan

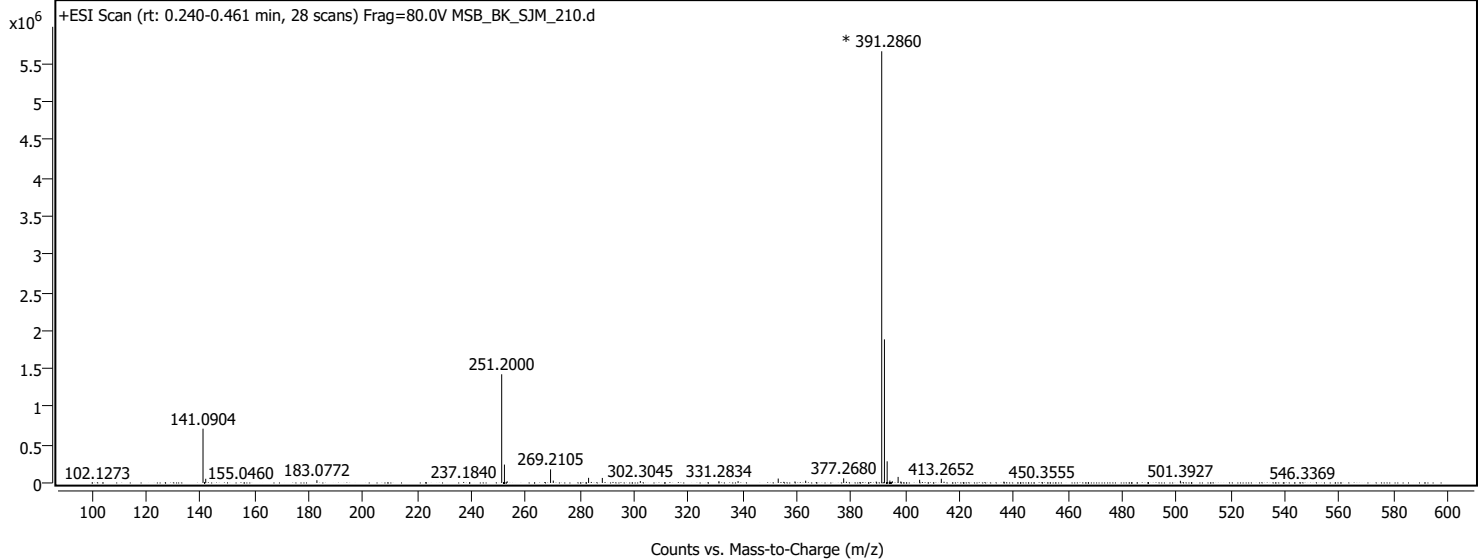

## Compound Details

## Cpd. 1: C24 H38 O4

| Formula    | m/z      | Observed M/Z     | Difference Da    | Difference PPM   | Score |
|------------|----------|------------------|------------------|------------------|-------|
| C24 H38 O4 | 413.2652 | 413.265199139718 | 1.05529031048945 | 2.70395202447834 | 97.24 |

## Compound Spectra (Zoomed)

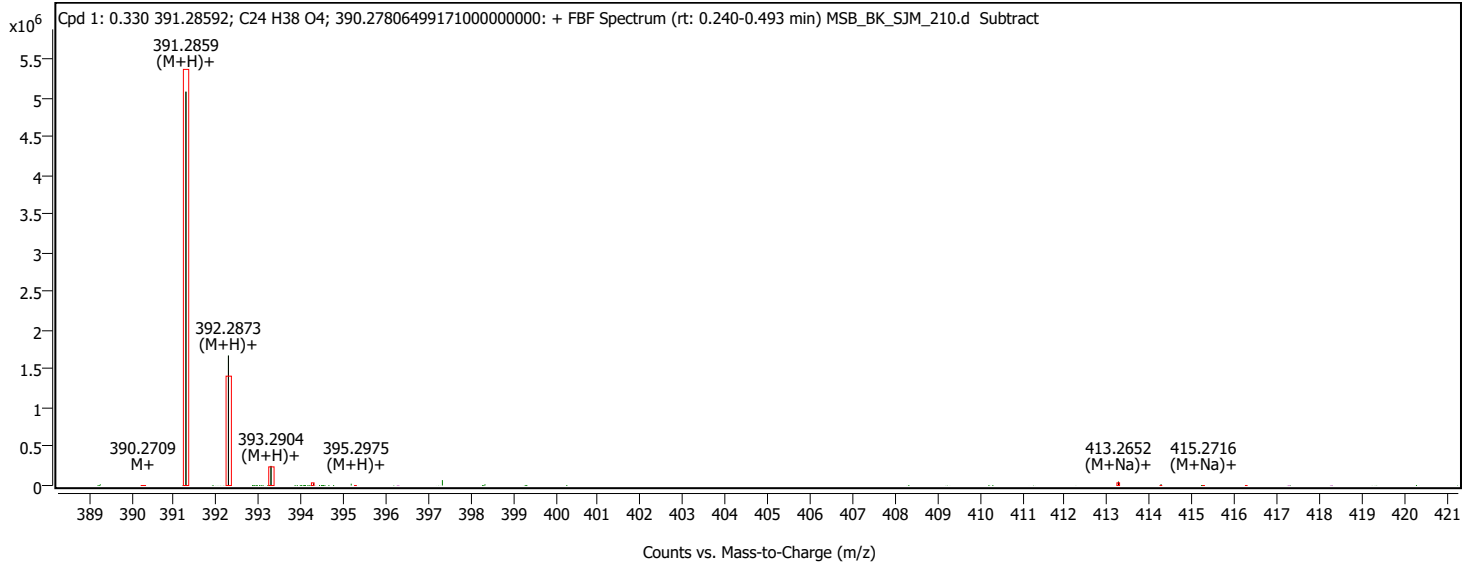

MassHunter Qual 10.0  
(End of Report)
