# Supplementary figures and images for: Continuous-flow Fe-zeolite-catalyzed temperature-directed synthesis of bioactive tetraketones and xanthenes using epoxides and cyclic-1,3-diketones via a Meinwald rearrangement
Source: Royal Society of Chemistry journal article supplement (doi:10.1039/d2re00452f), 2022-12-16

SJM 292

IISER PUNE

SJM 292 75 (1.394) AM2 (Ar,20000.0,556.28,0.00,LS 3); Sm (SG, 3x1.00)

1: TOF MS ES+  
7.84e3

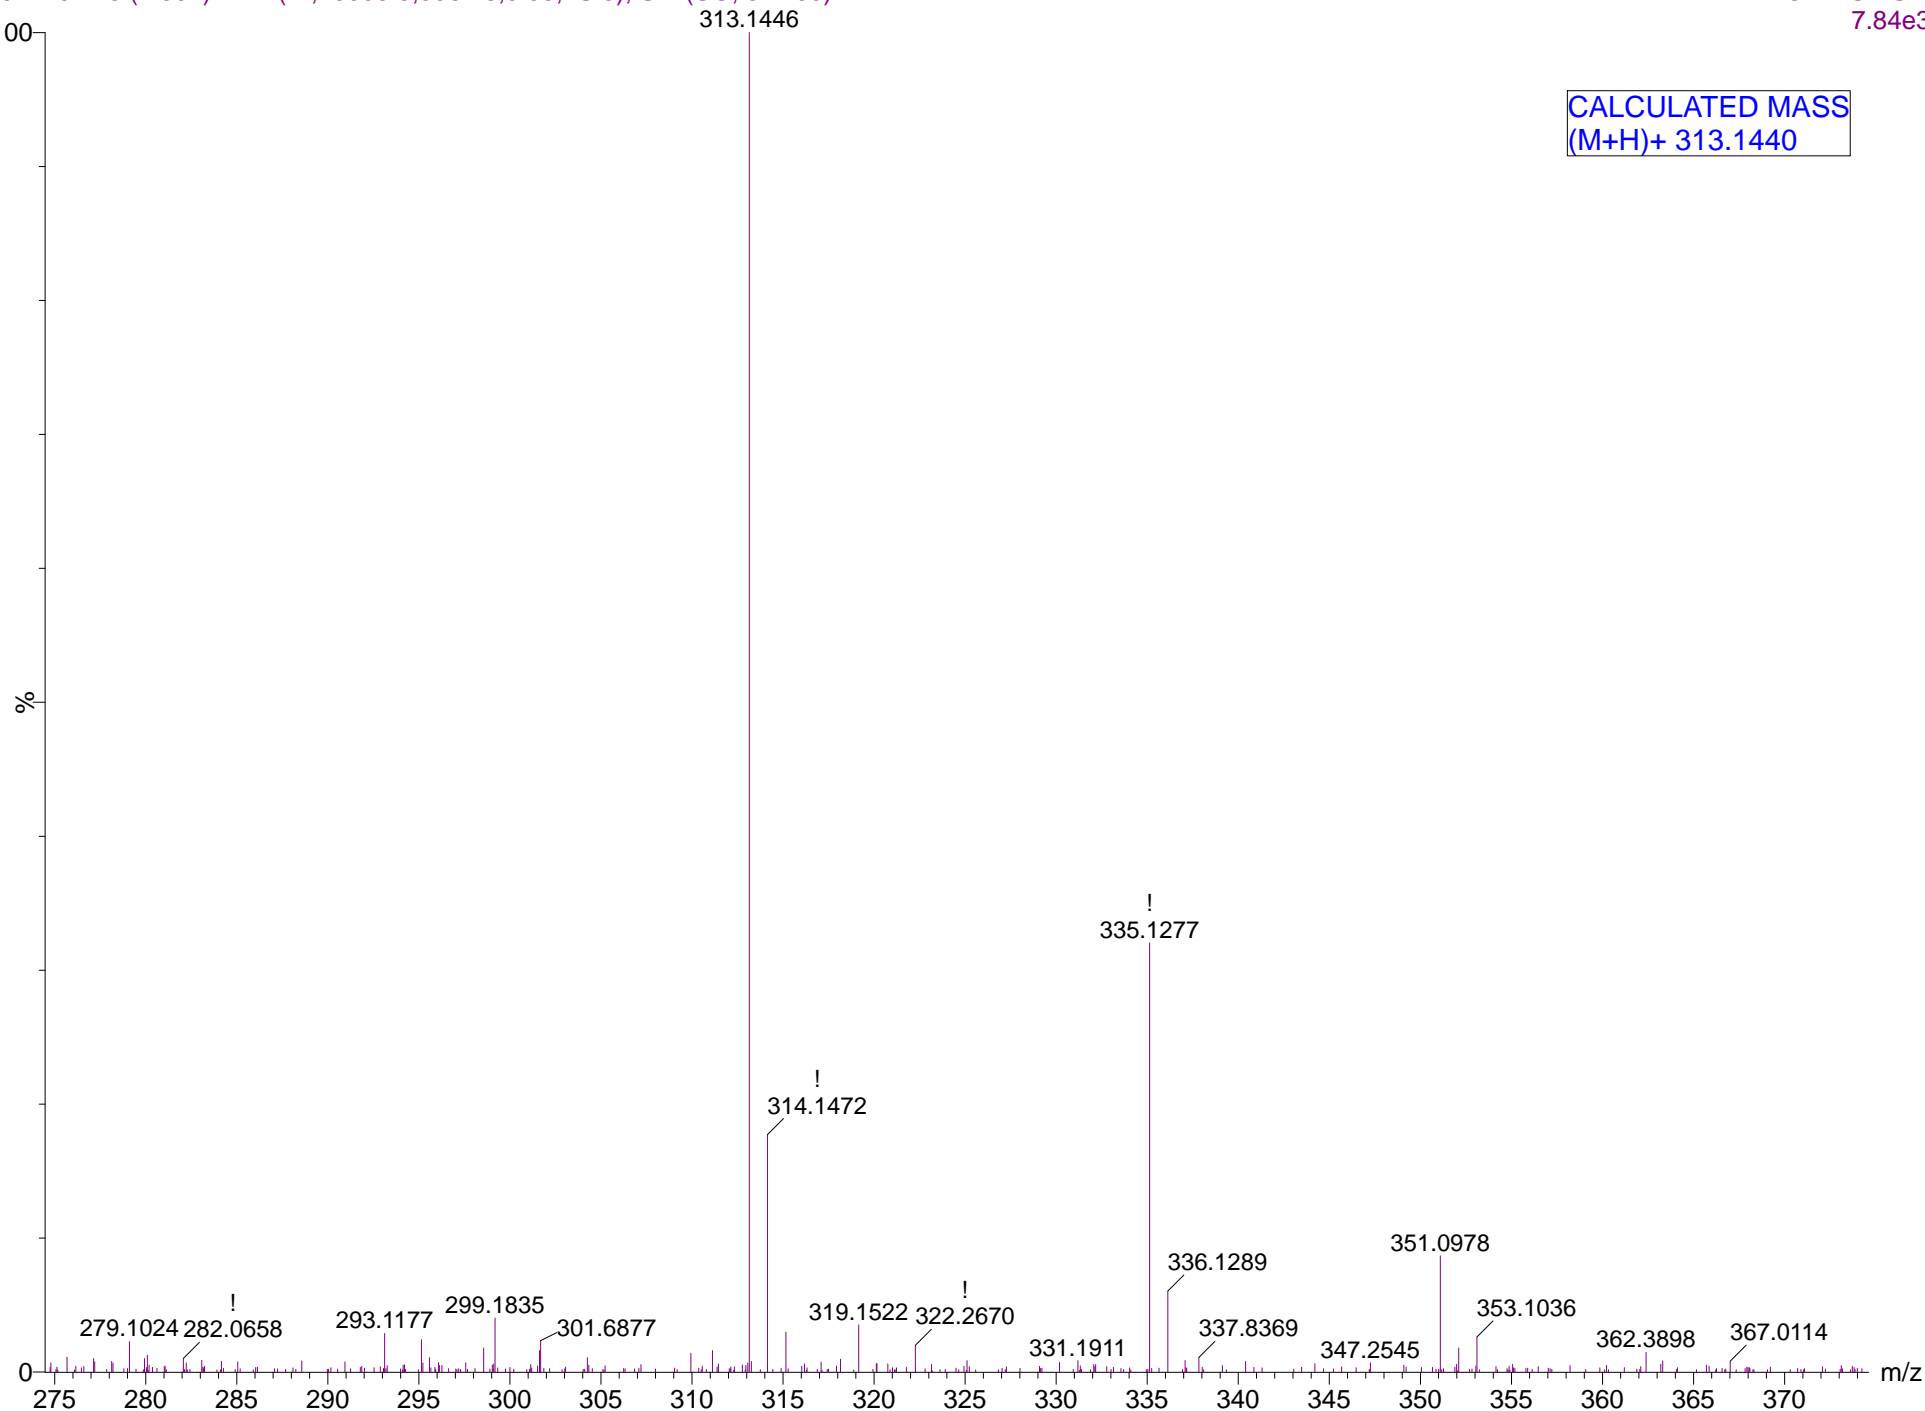

Supplement: d2re00452f1.zip [file d2re00452f1.zip]

SJM 287

IISER PUNE

SJM 287 118 (2.167) AM2 (Ar,20000.0,556.28,0.00,LS 3); Sm (SG, 3x1.00)

1: TOF MS ES+  
2.30e6

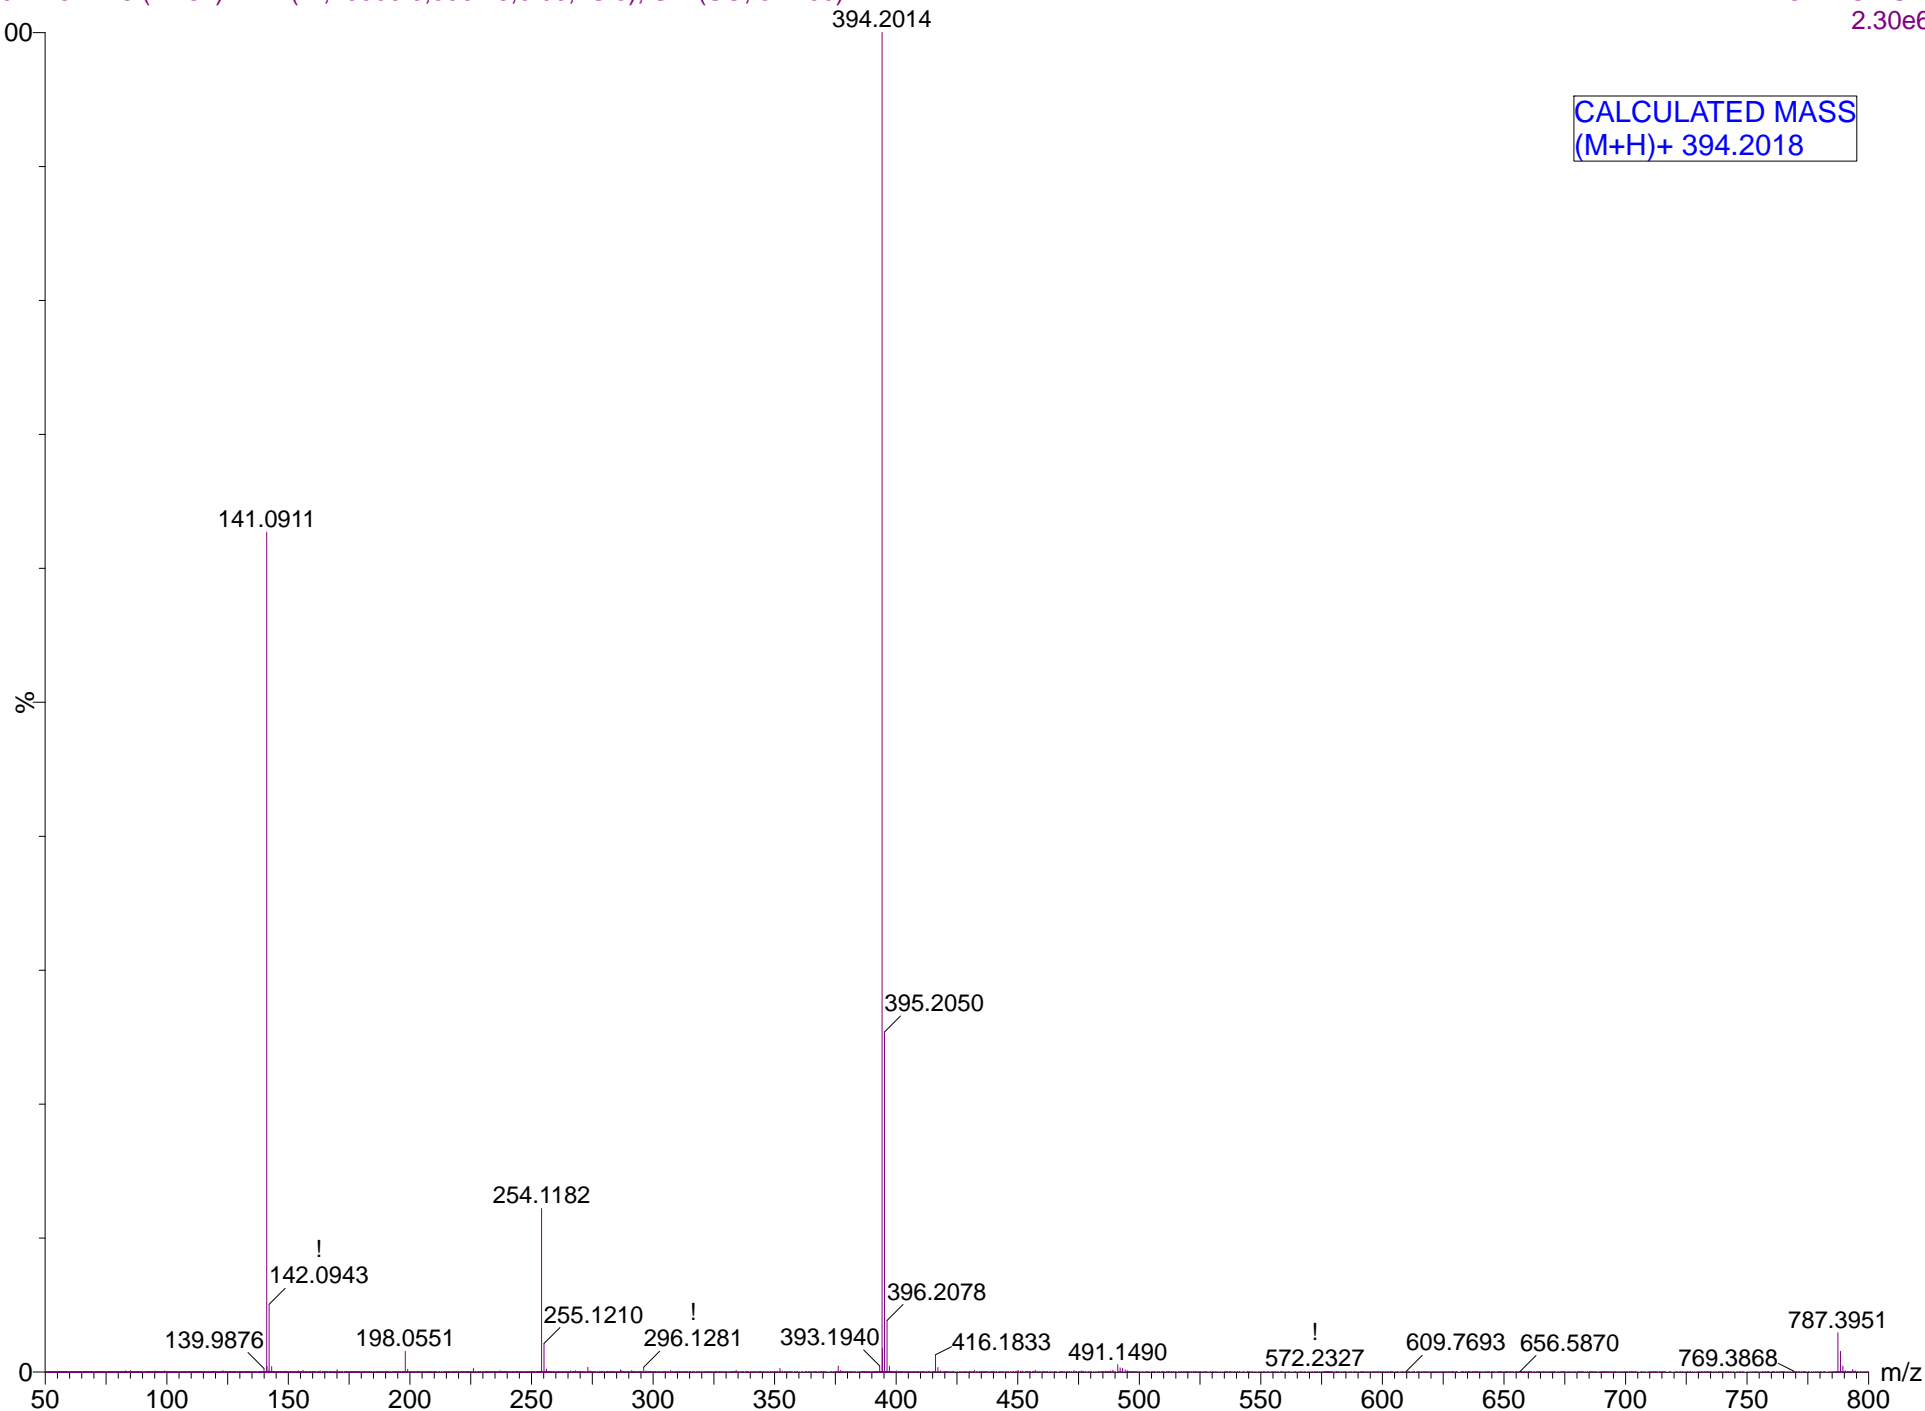

Supplement: d2re00452f1.zip [file d2re00452f1.zip]

SJM 303

IISER PUNE

SJM 303 111 (2.048) AM2 (Ar,20000.0,556.28,0.00,LS 3); Sm (SG, 3x1.00)

1: TOF MS ES+  
6.20e4

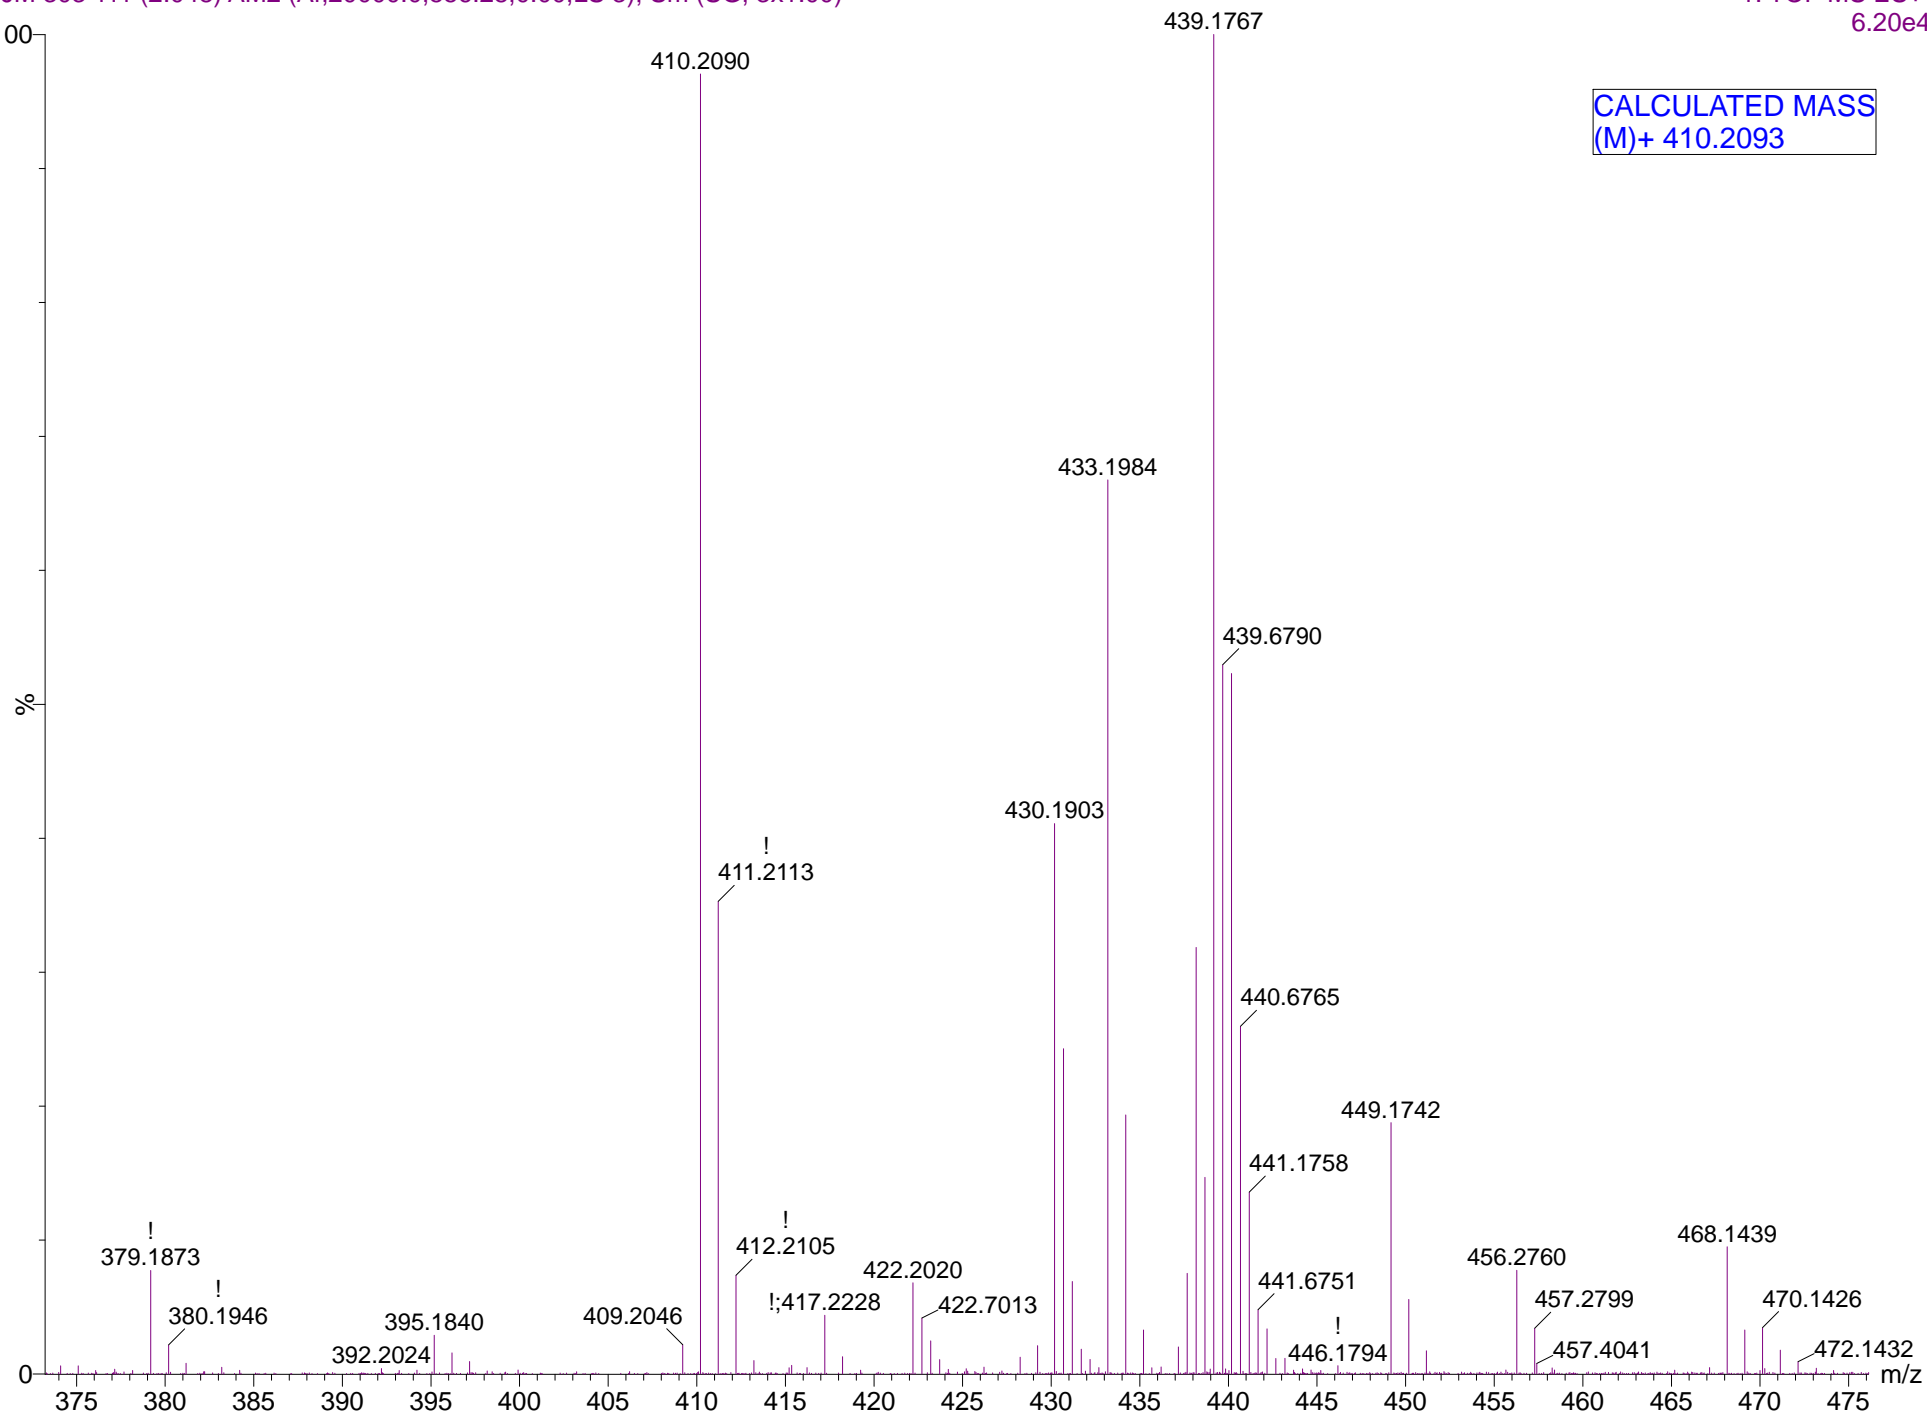

Supplement: d2re00452f1.zip [file d2re00452f1.zip]

SJM 67

IISER PUNE

SJM 67 103 (1.892) AM2 (Ar,20000.0,556.28,0.00,LS 3); Sm (SG, 3x1.00)

1: TOF MS ES+  
3.76e4

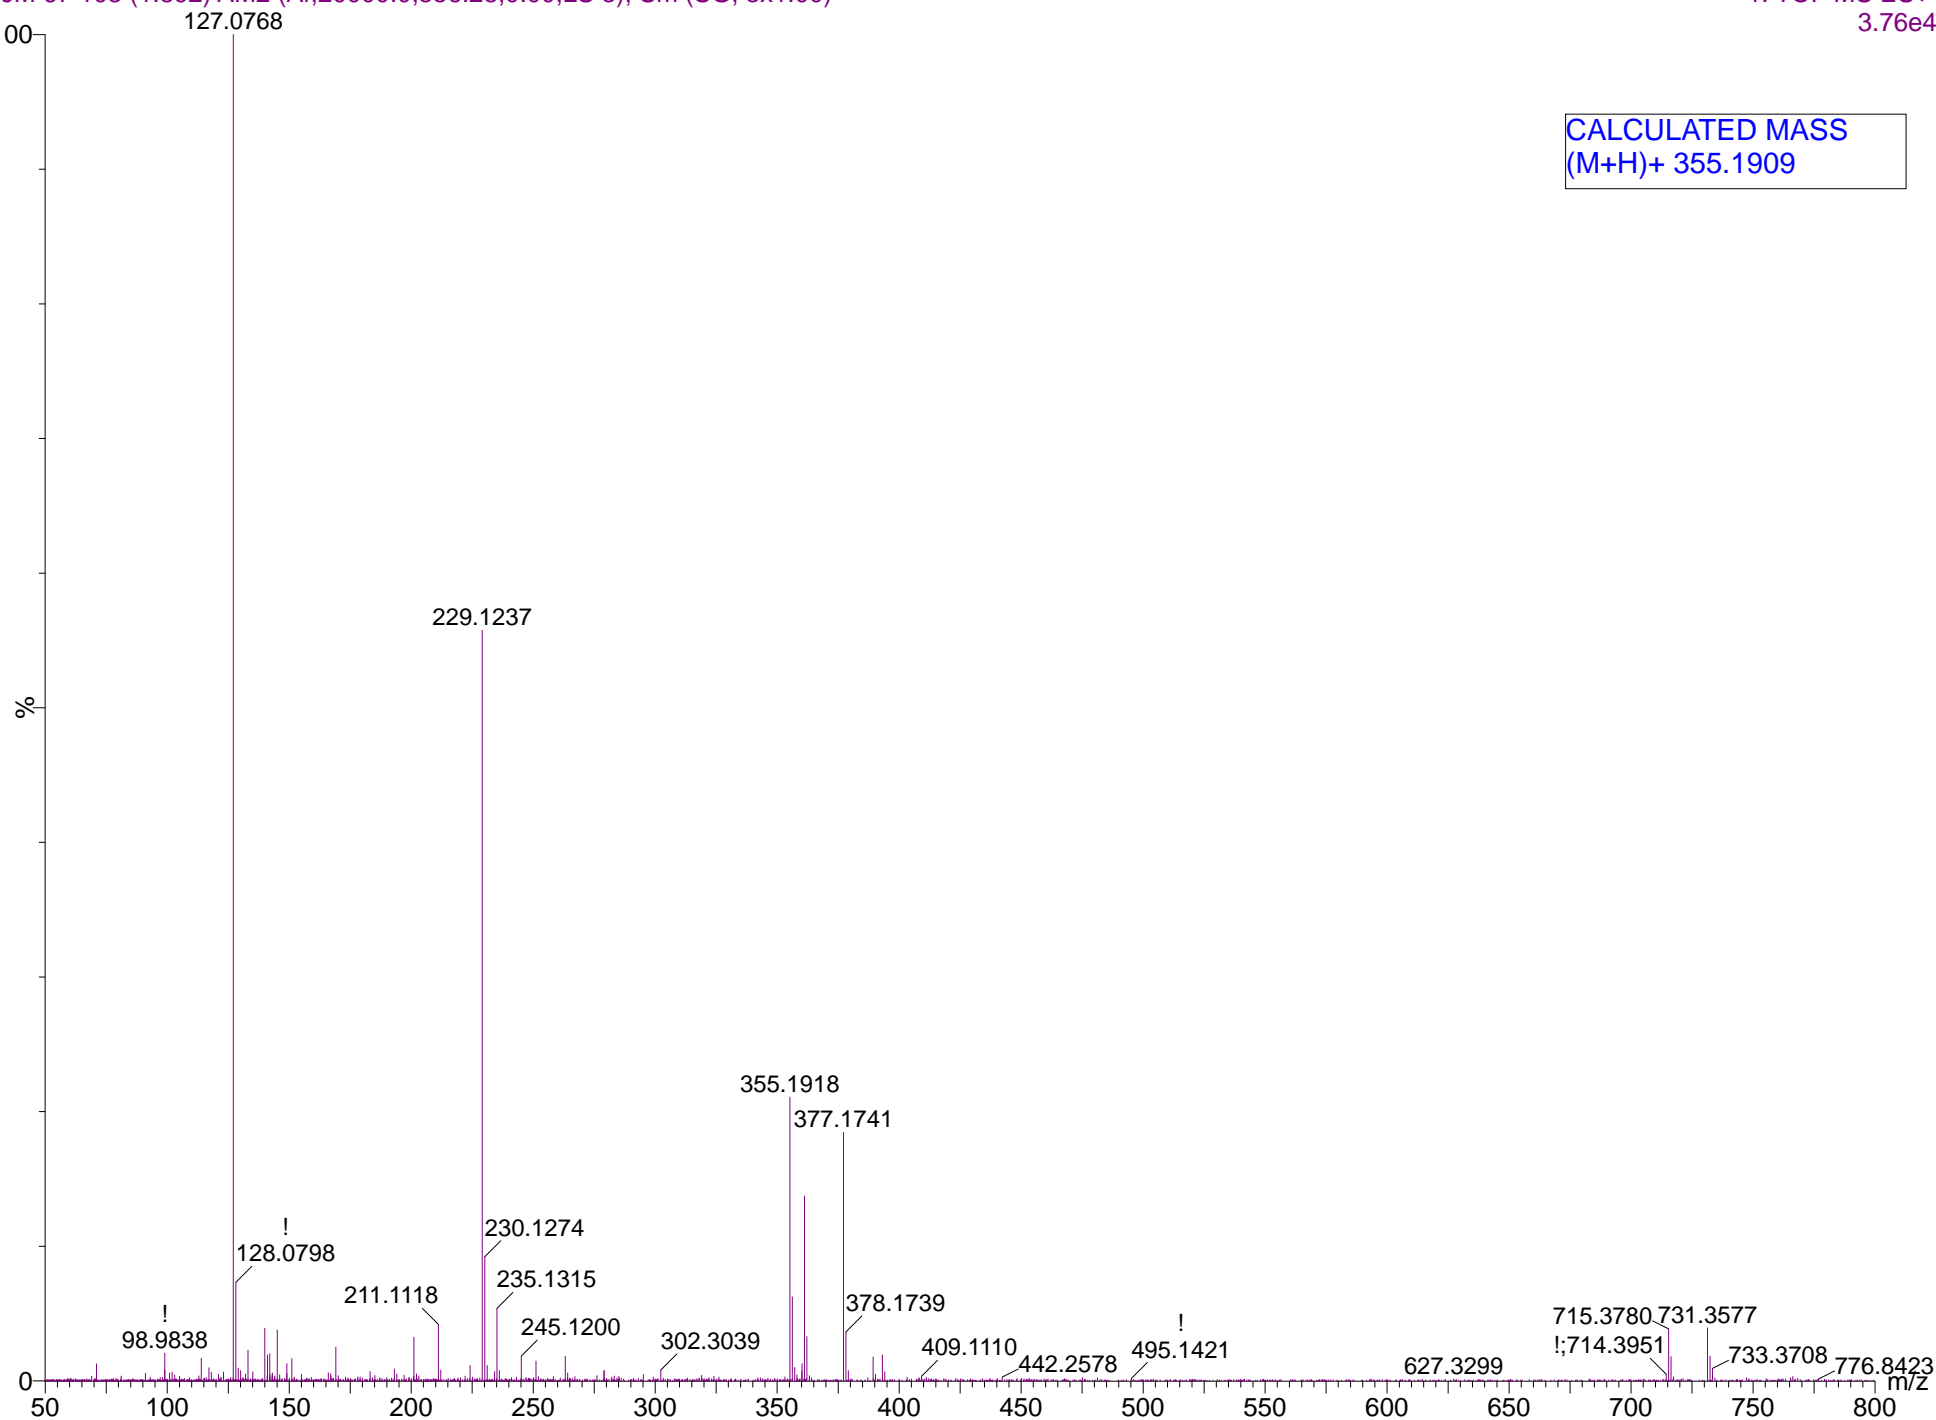

Supplement: d2re00452f1.zip [file d2re00452f1.zip]

SJM 213

IISER PUNE

SJM 213 174 (3.182) AM2 (Ar,20000.0,556.28,0.00,LS 3); Sm (SG, 3x1.00); Cm (173:176-(1:171+178:272))

1: TOF MS ES+  
8.33e4

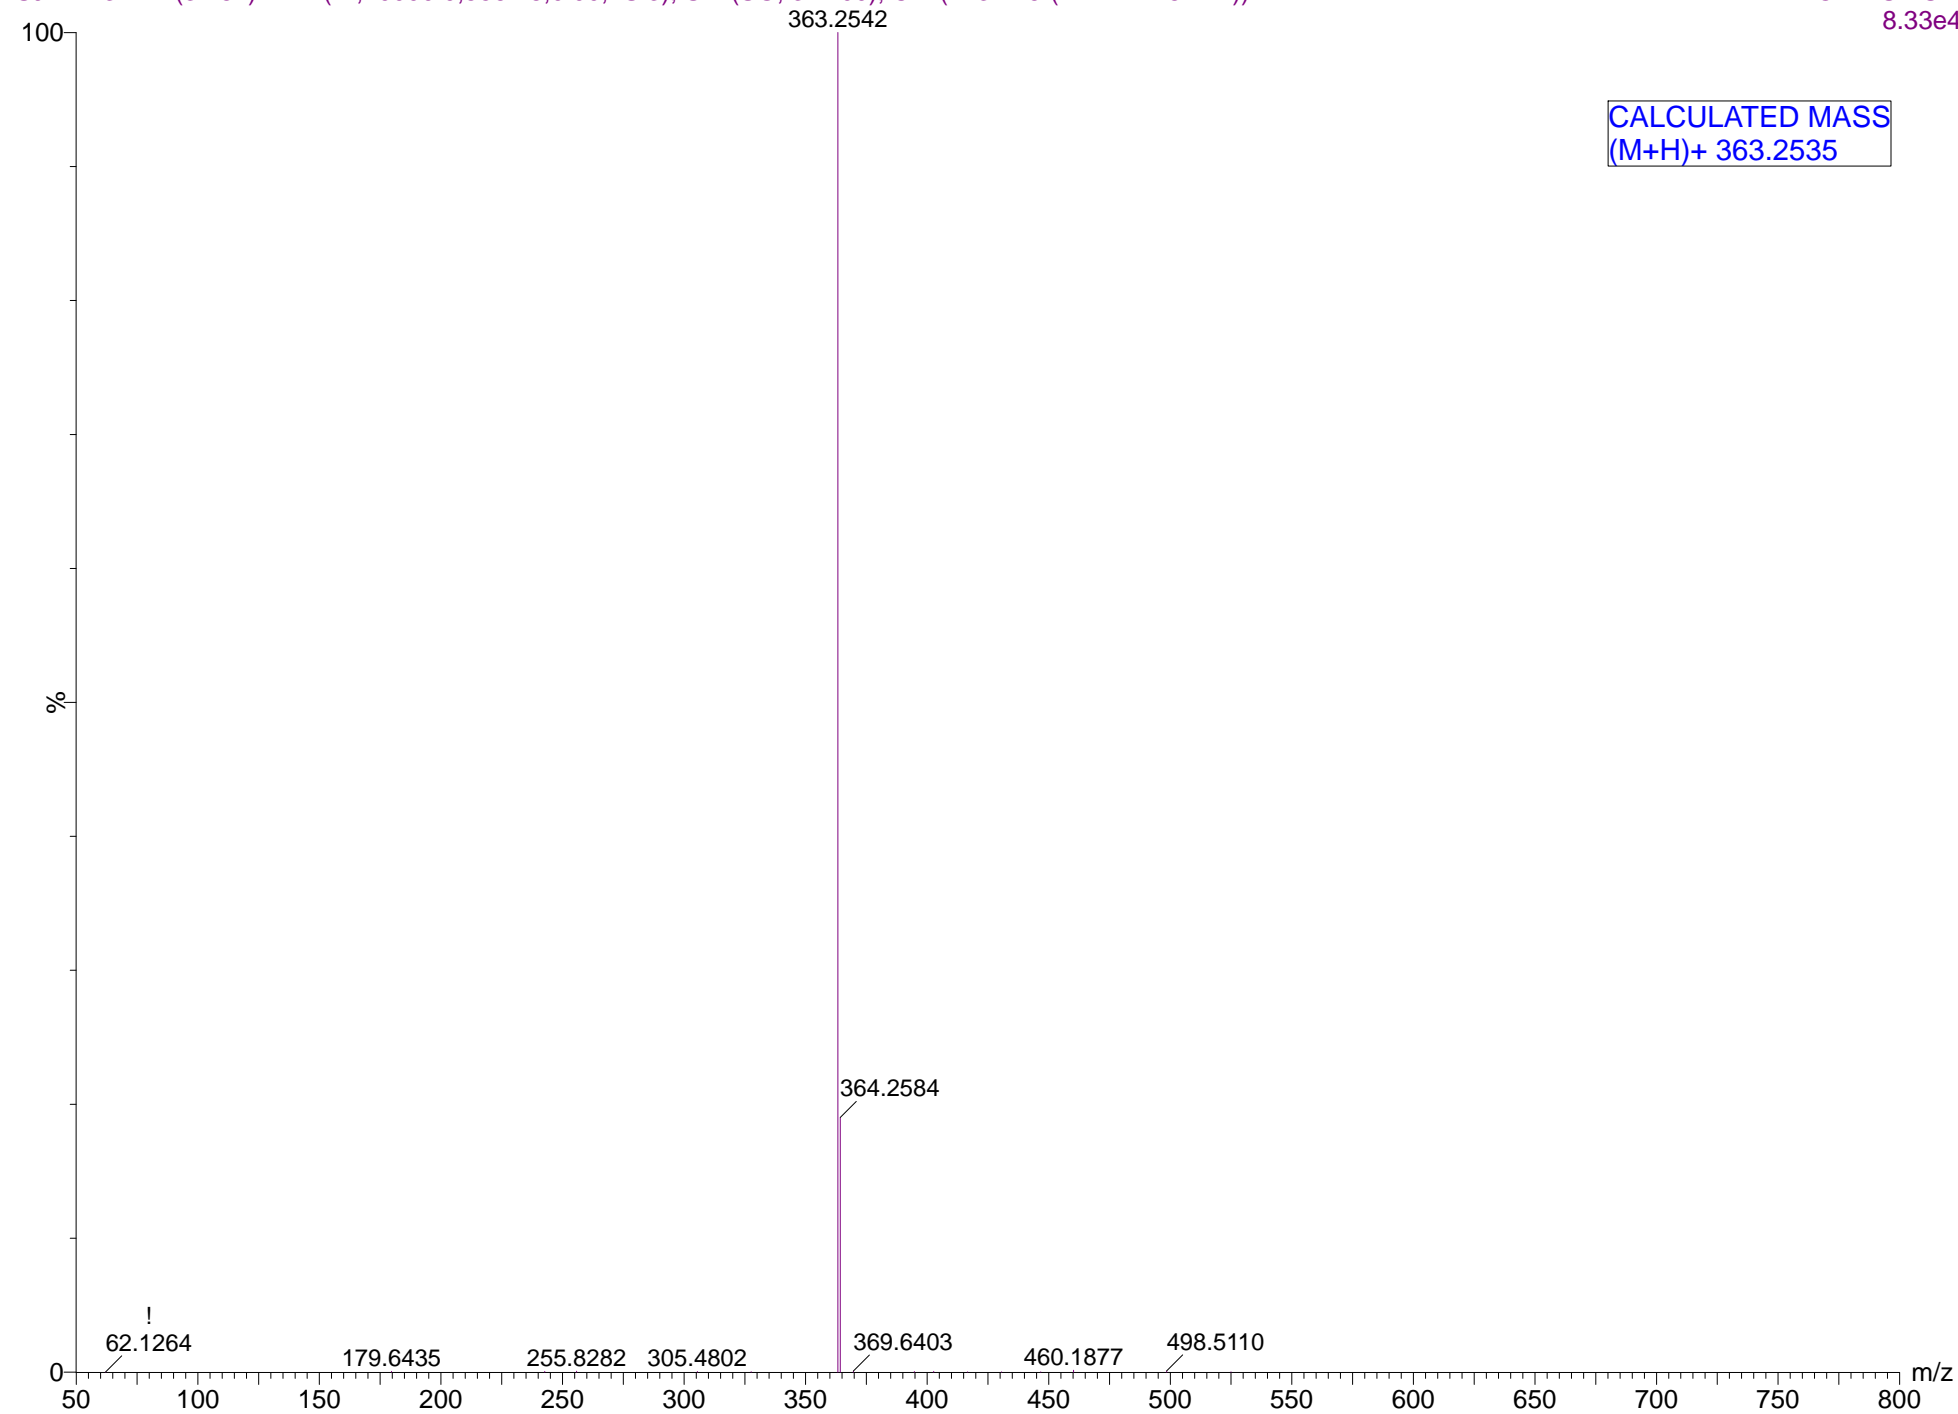

Supplement: d2re00452f1.zip [file d2re00452f1.zip]

SJM 285

IISER PUNE

SJM 285 129 (2.375) AM2 (Ar,20000.0,556.28,0.00,LS 3); Sm (SG, 3x1.00)

1: TOF MS ES+  
1.15e5

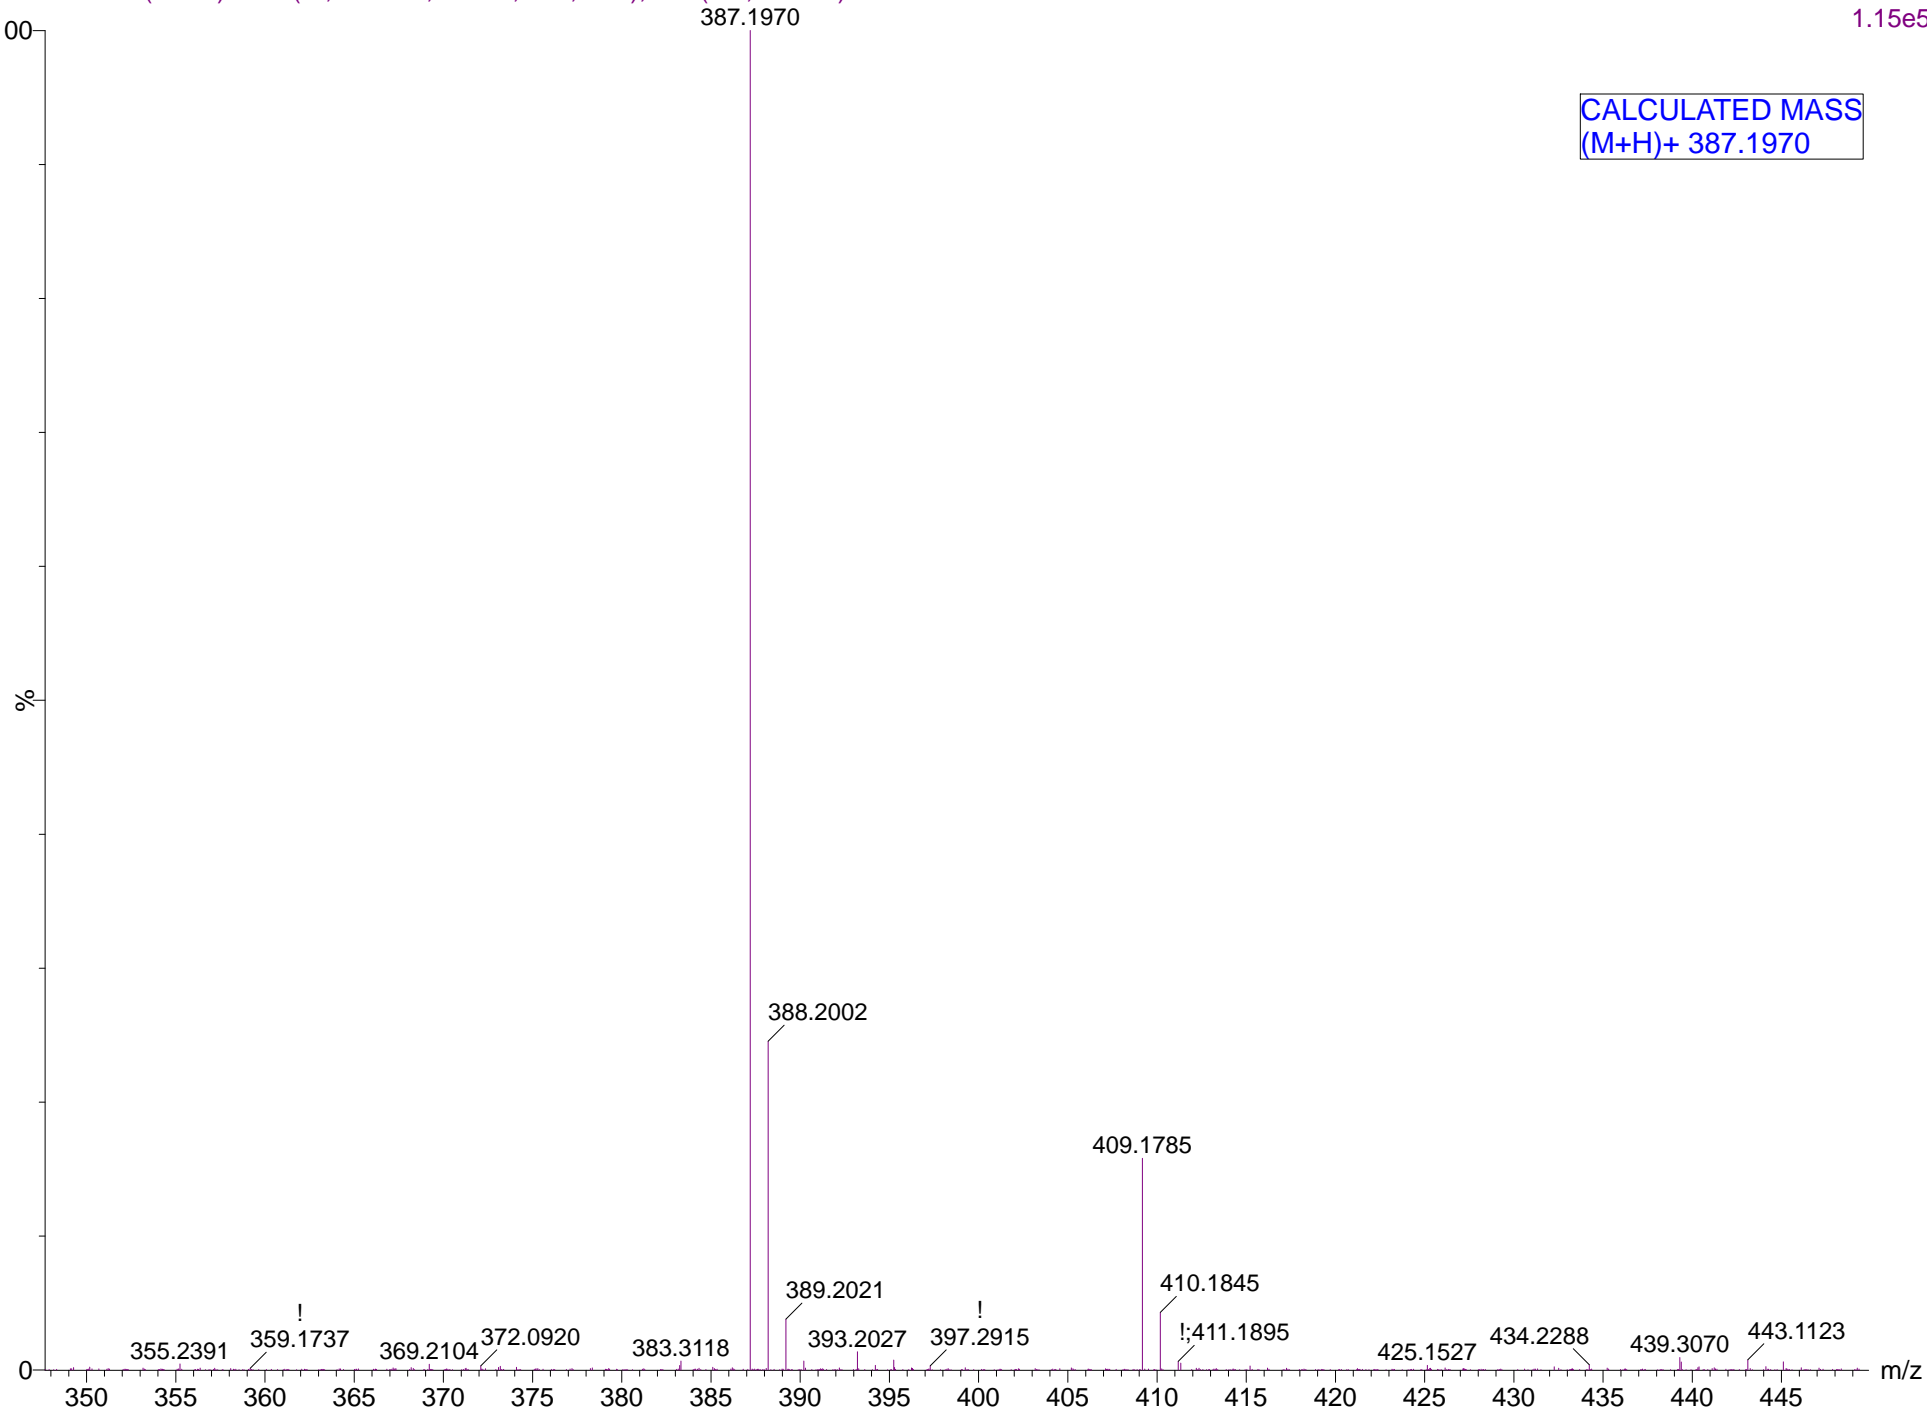

Supplement: d2re00452f1.zip [file d2re00452f1.zip]

SJM 274

SJM 274 161 (2.941) AM2 (Ar,20000.0,556.28,0.00,LS 3); Sm (SG, 3x1.00)

IISER PUNE

1: TOF MS ES+  
4.86e5

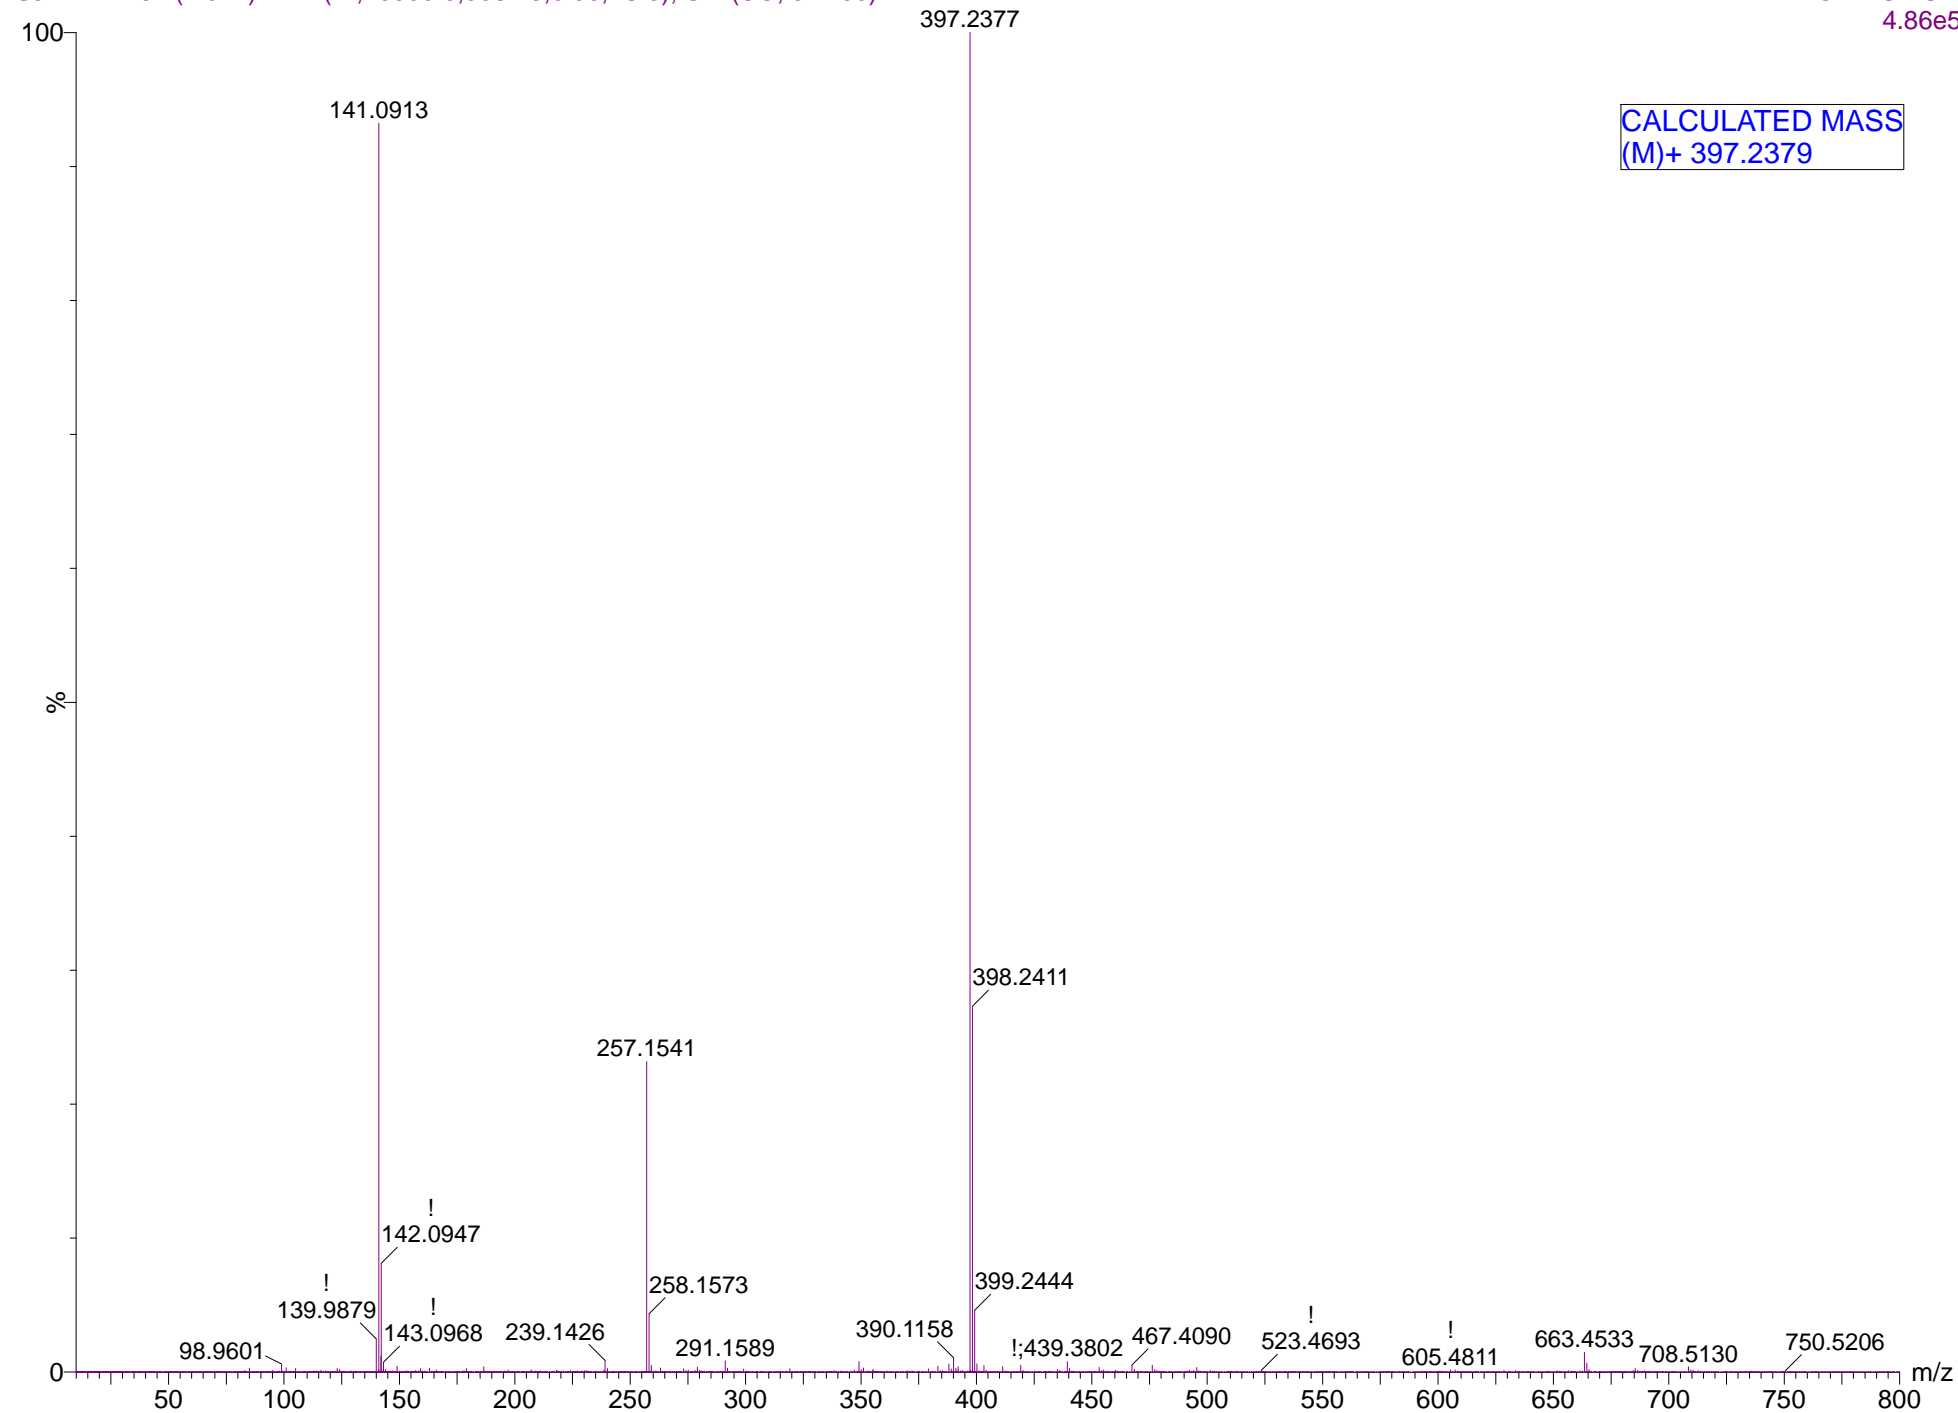

Supplement: d2re00452f1.zip [file d2re00452f1.zip]

SJM 302

IISER PUNE

SJM 302 144 (2.631) AM2 (Ar,20000.0,556.28,0.00,LS 3); Sm (SG, 3x1.00)

1: TOF MS ES+  
2.67e4

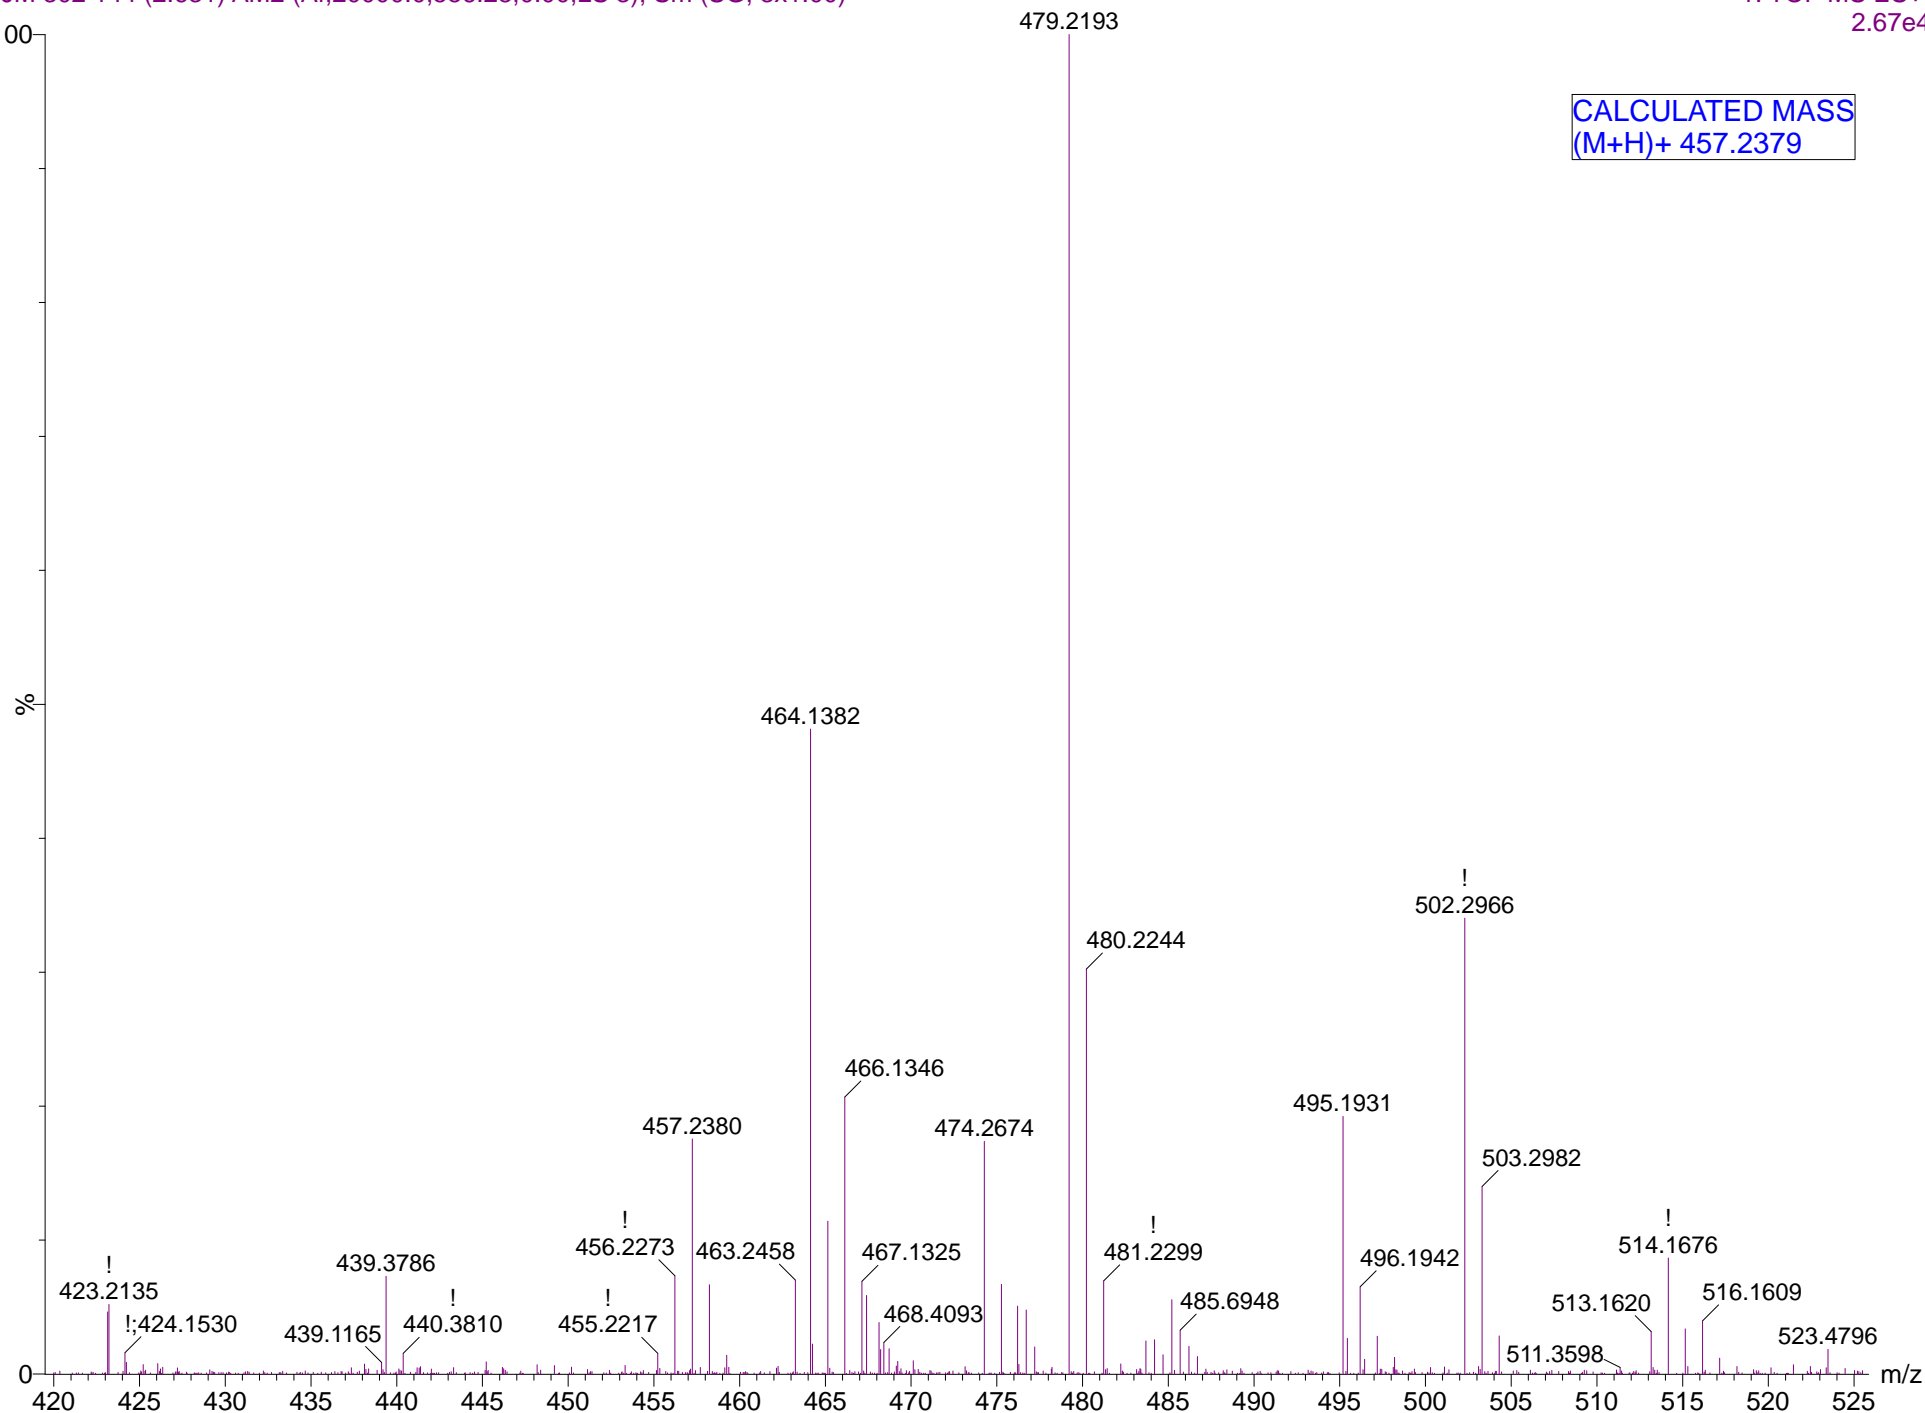

Supplement: d2re00452f1.zip [file d2re00452f1.zip]

SJM 51

IISER PUNE

SJM 51 132 (2.426) AM2 (Ar,20000.0,556.28,0.00,LS 3); Sm (SG, 3x1.00)

1: TOF MS ES+  
6.11e6

CALCULATED MASS  
(M+H)<sup>+</sup> 365.2116

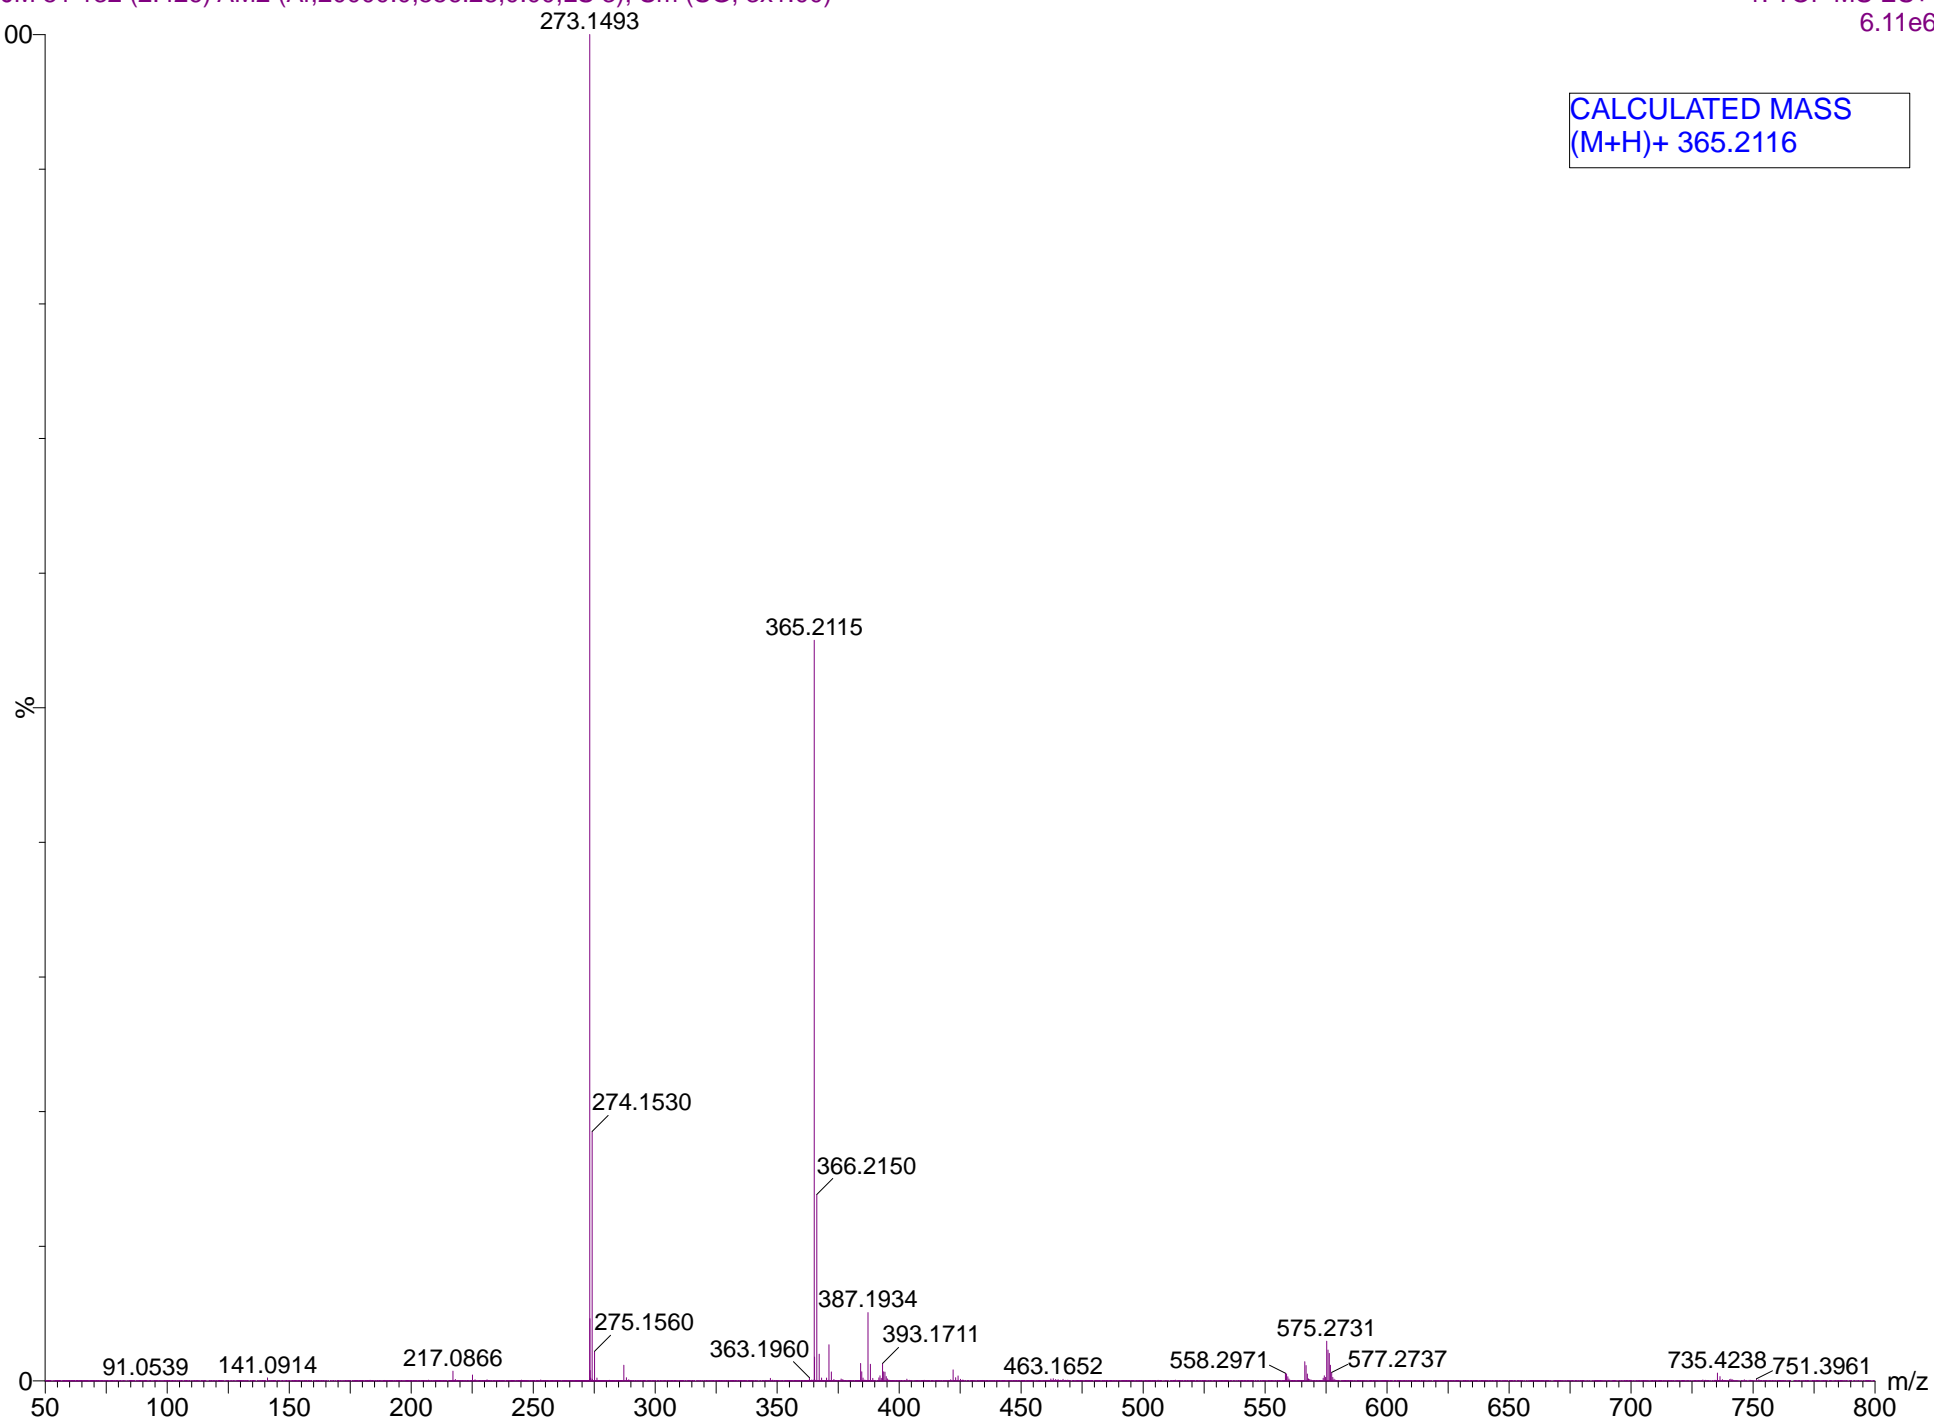

Supplement: d2re00452f1.zip [file d2re00452f1.zip]

SJM 209

IISER PUNE

SJM 209 166 (3.046) AM2 (Ar,20000.0,556.28,0.00,LS 3); Sm (SG, 3x1.00)

1: TOF MS ES+  
1.04e6

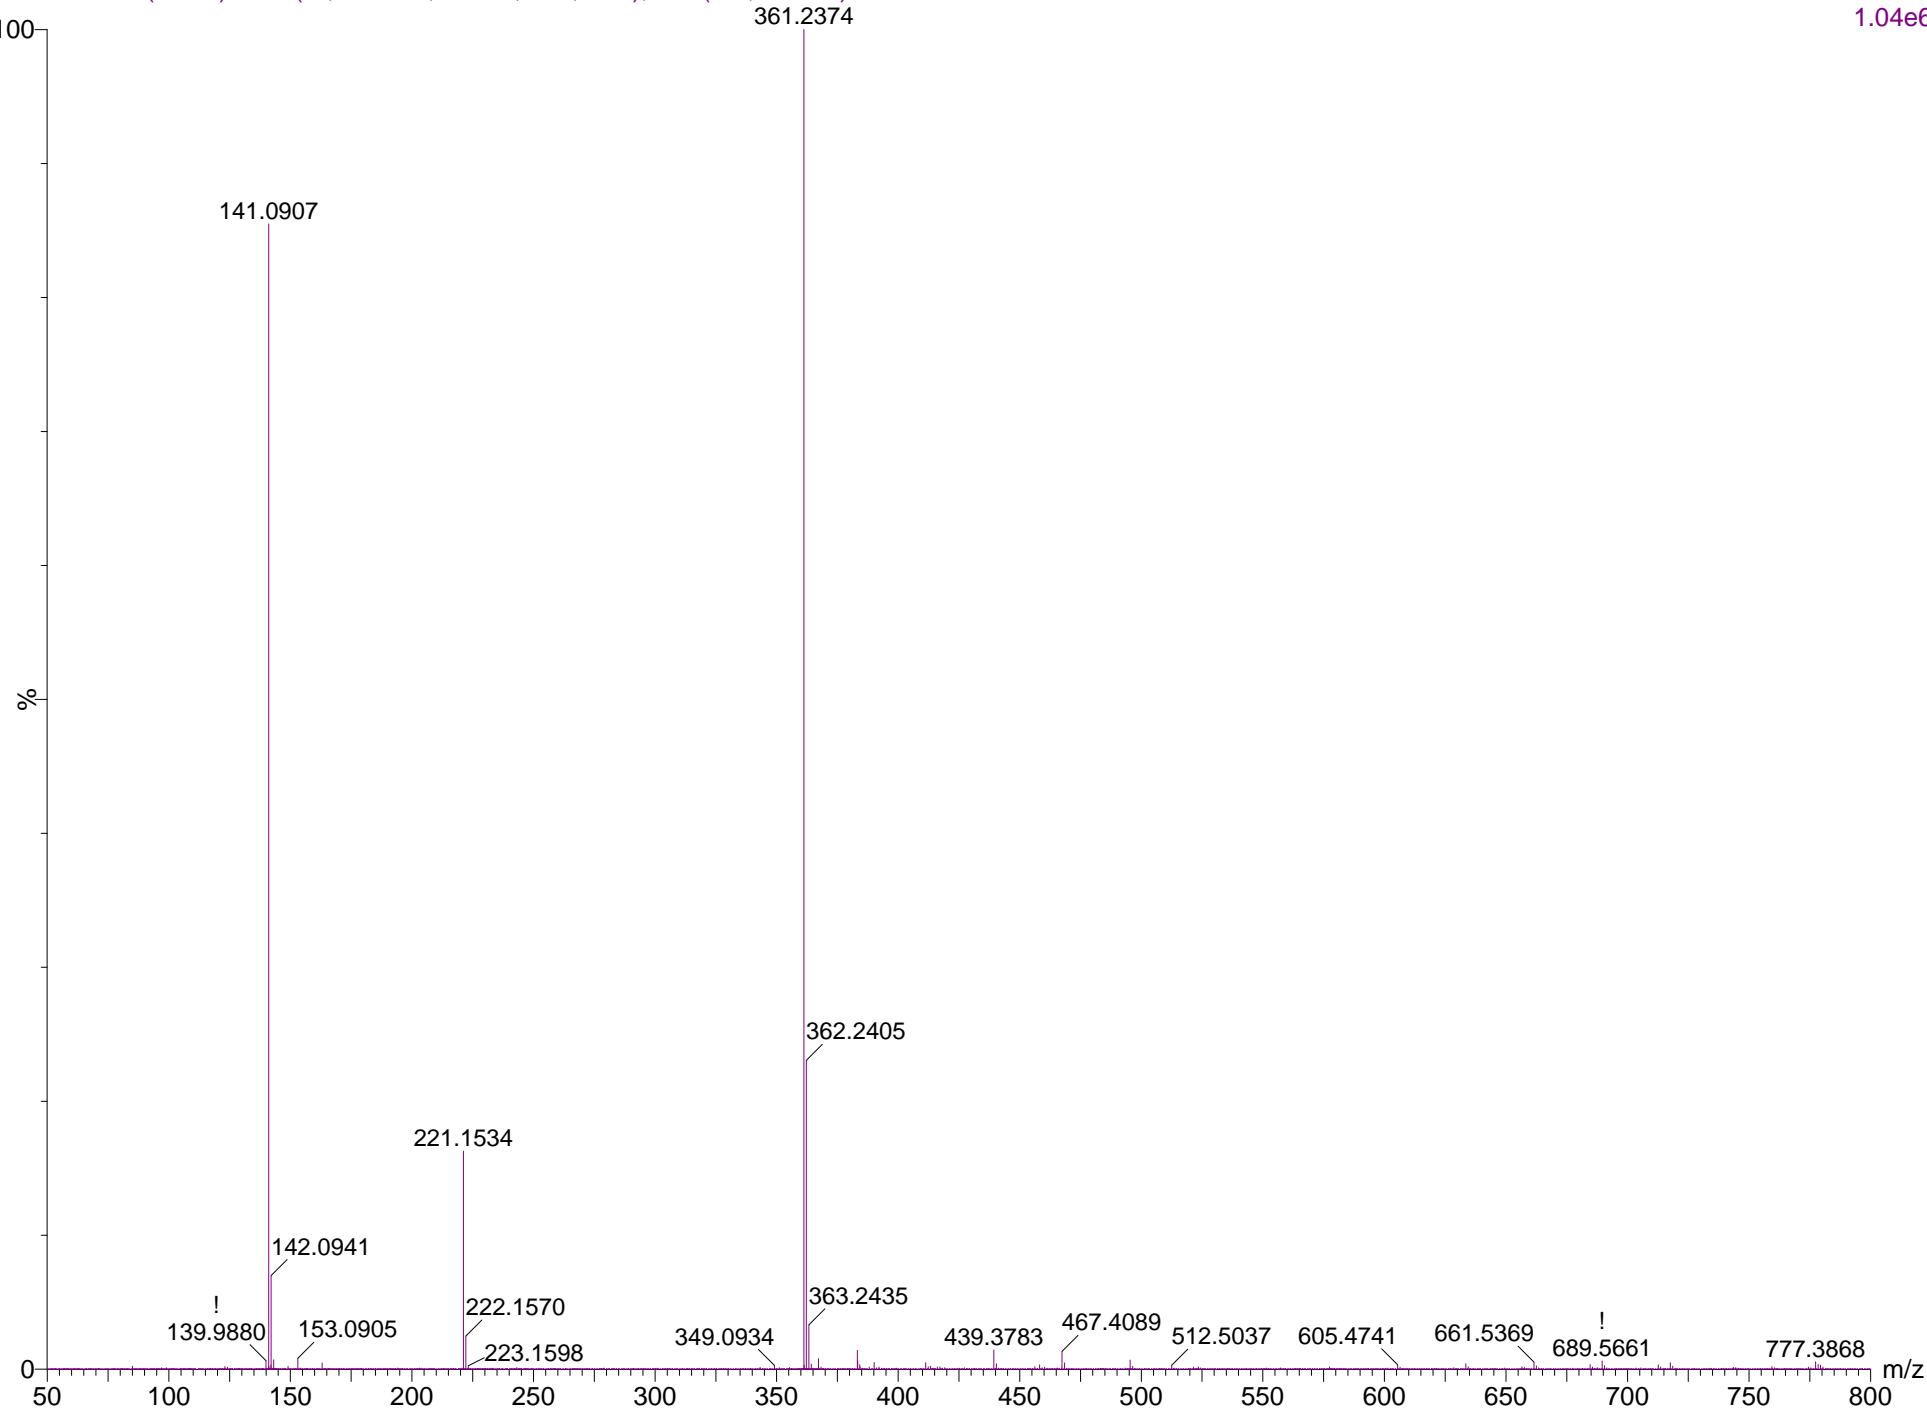

Supplement: d2re00452f1.zip [file d2re00452f1.zip]

SJM 94

IISER PUNE

SJM 94 118 (2.167) AM2 (Ar,20000.0,556.28,0.00,LS 3); ABS; Sm (SG, 3x1.00)

1: TOF MS ES+  
4.22e6

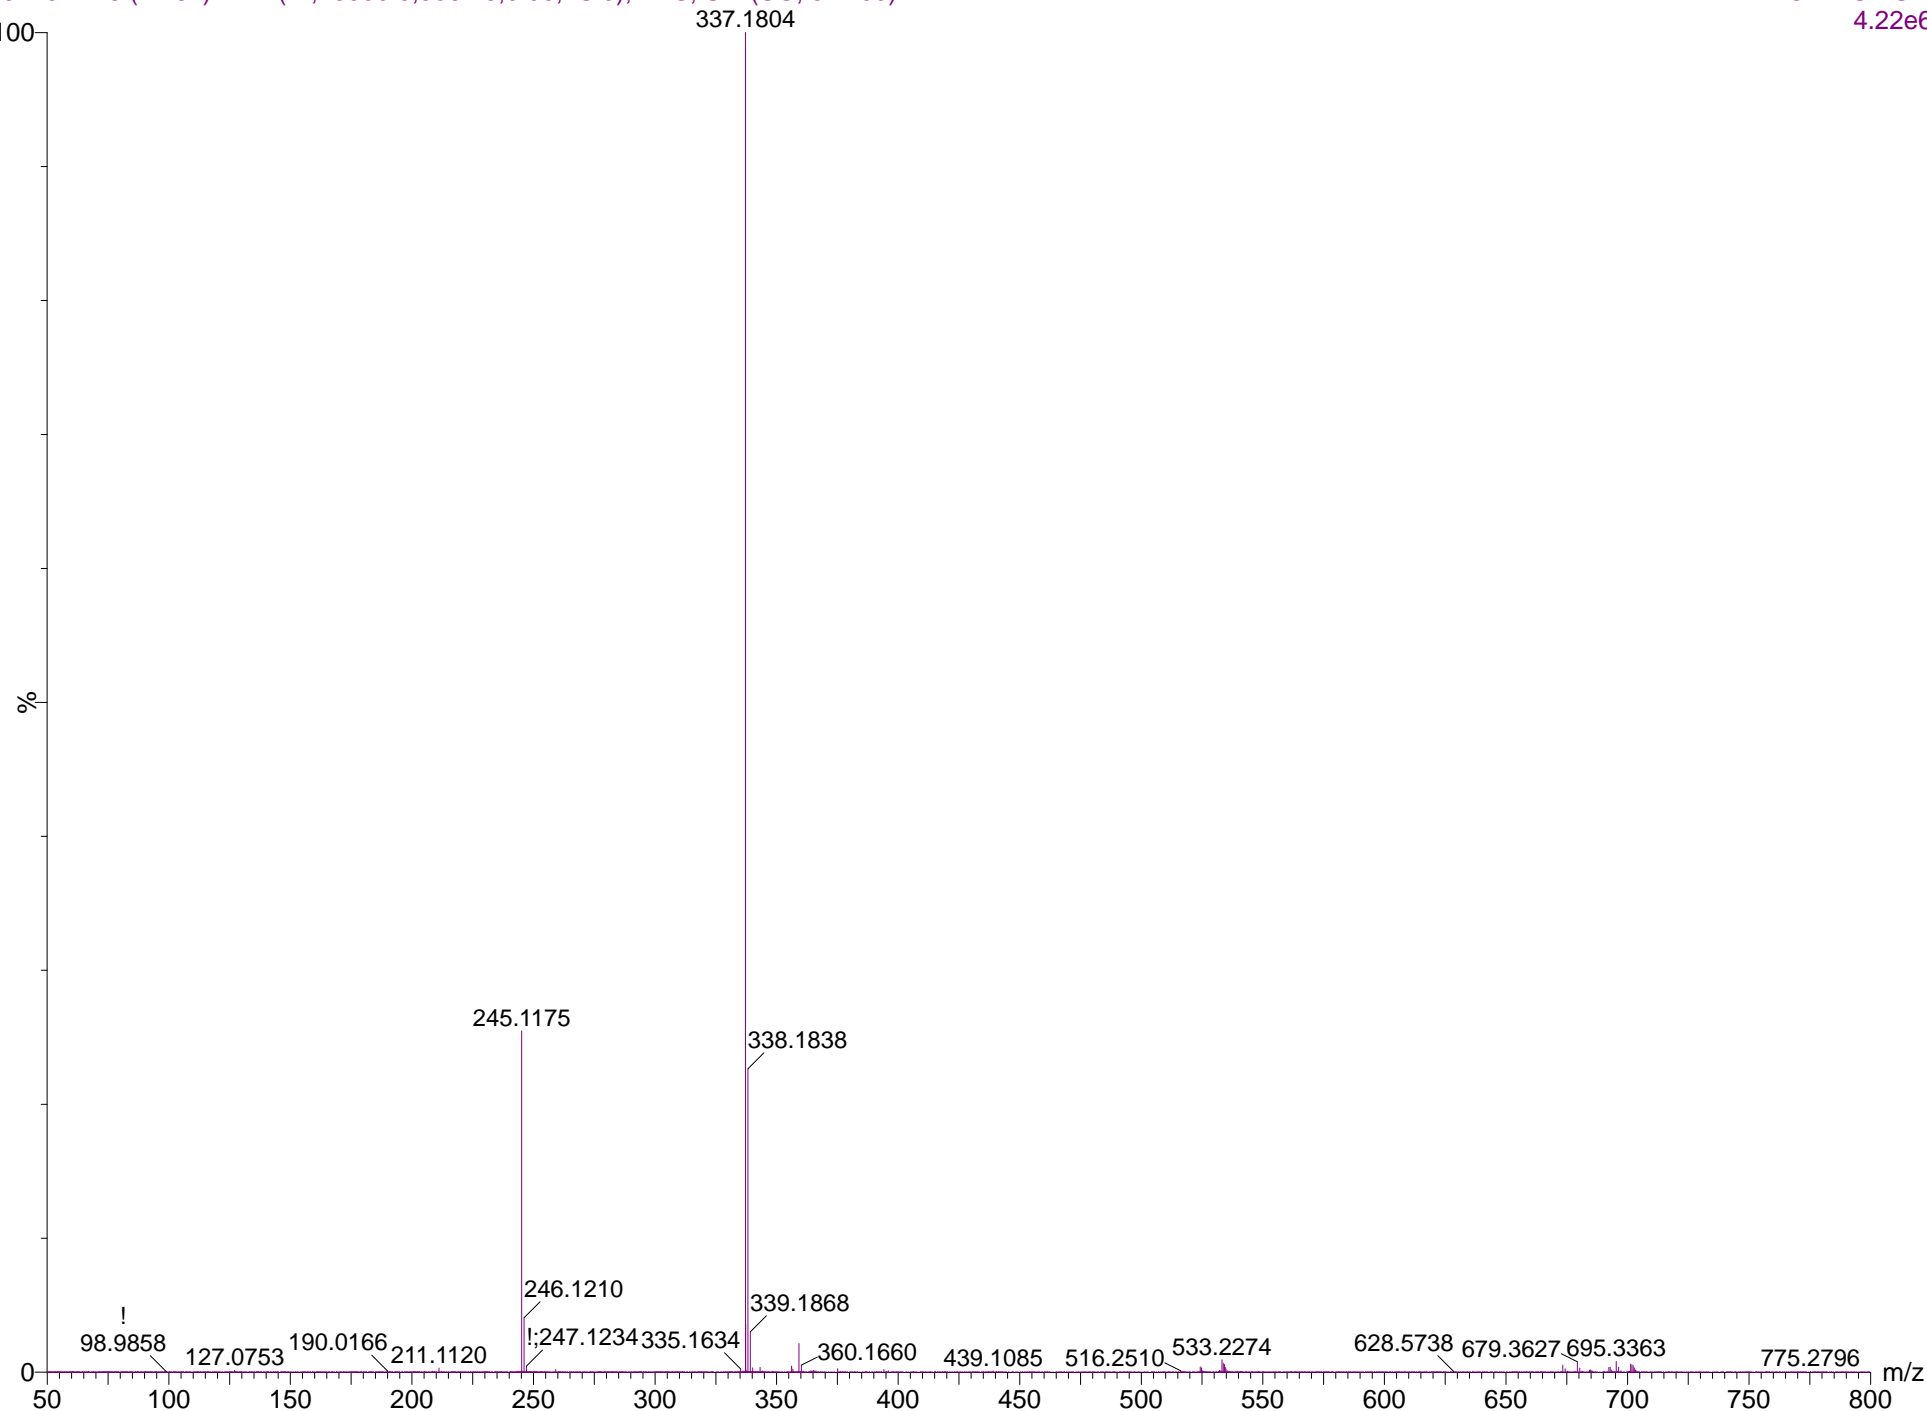

Supplement: d2re00452f1.zip [file d2re00452f1.zip]

SJM 176

IISER PUNE

SJM 176 142 (2.597) AM2 (Ar,20000.0,556.28,0.00,LS 3); Sm (SG, 3x1.00)

1: TOF MS ES+  
1.53e5

CALCULATED MASS  
(M+H)<sup>+</sup> 321.2066

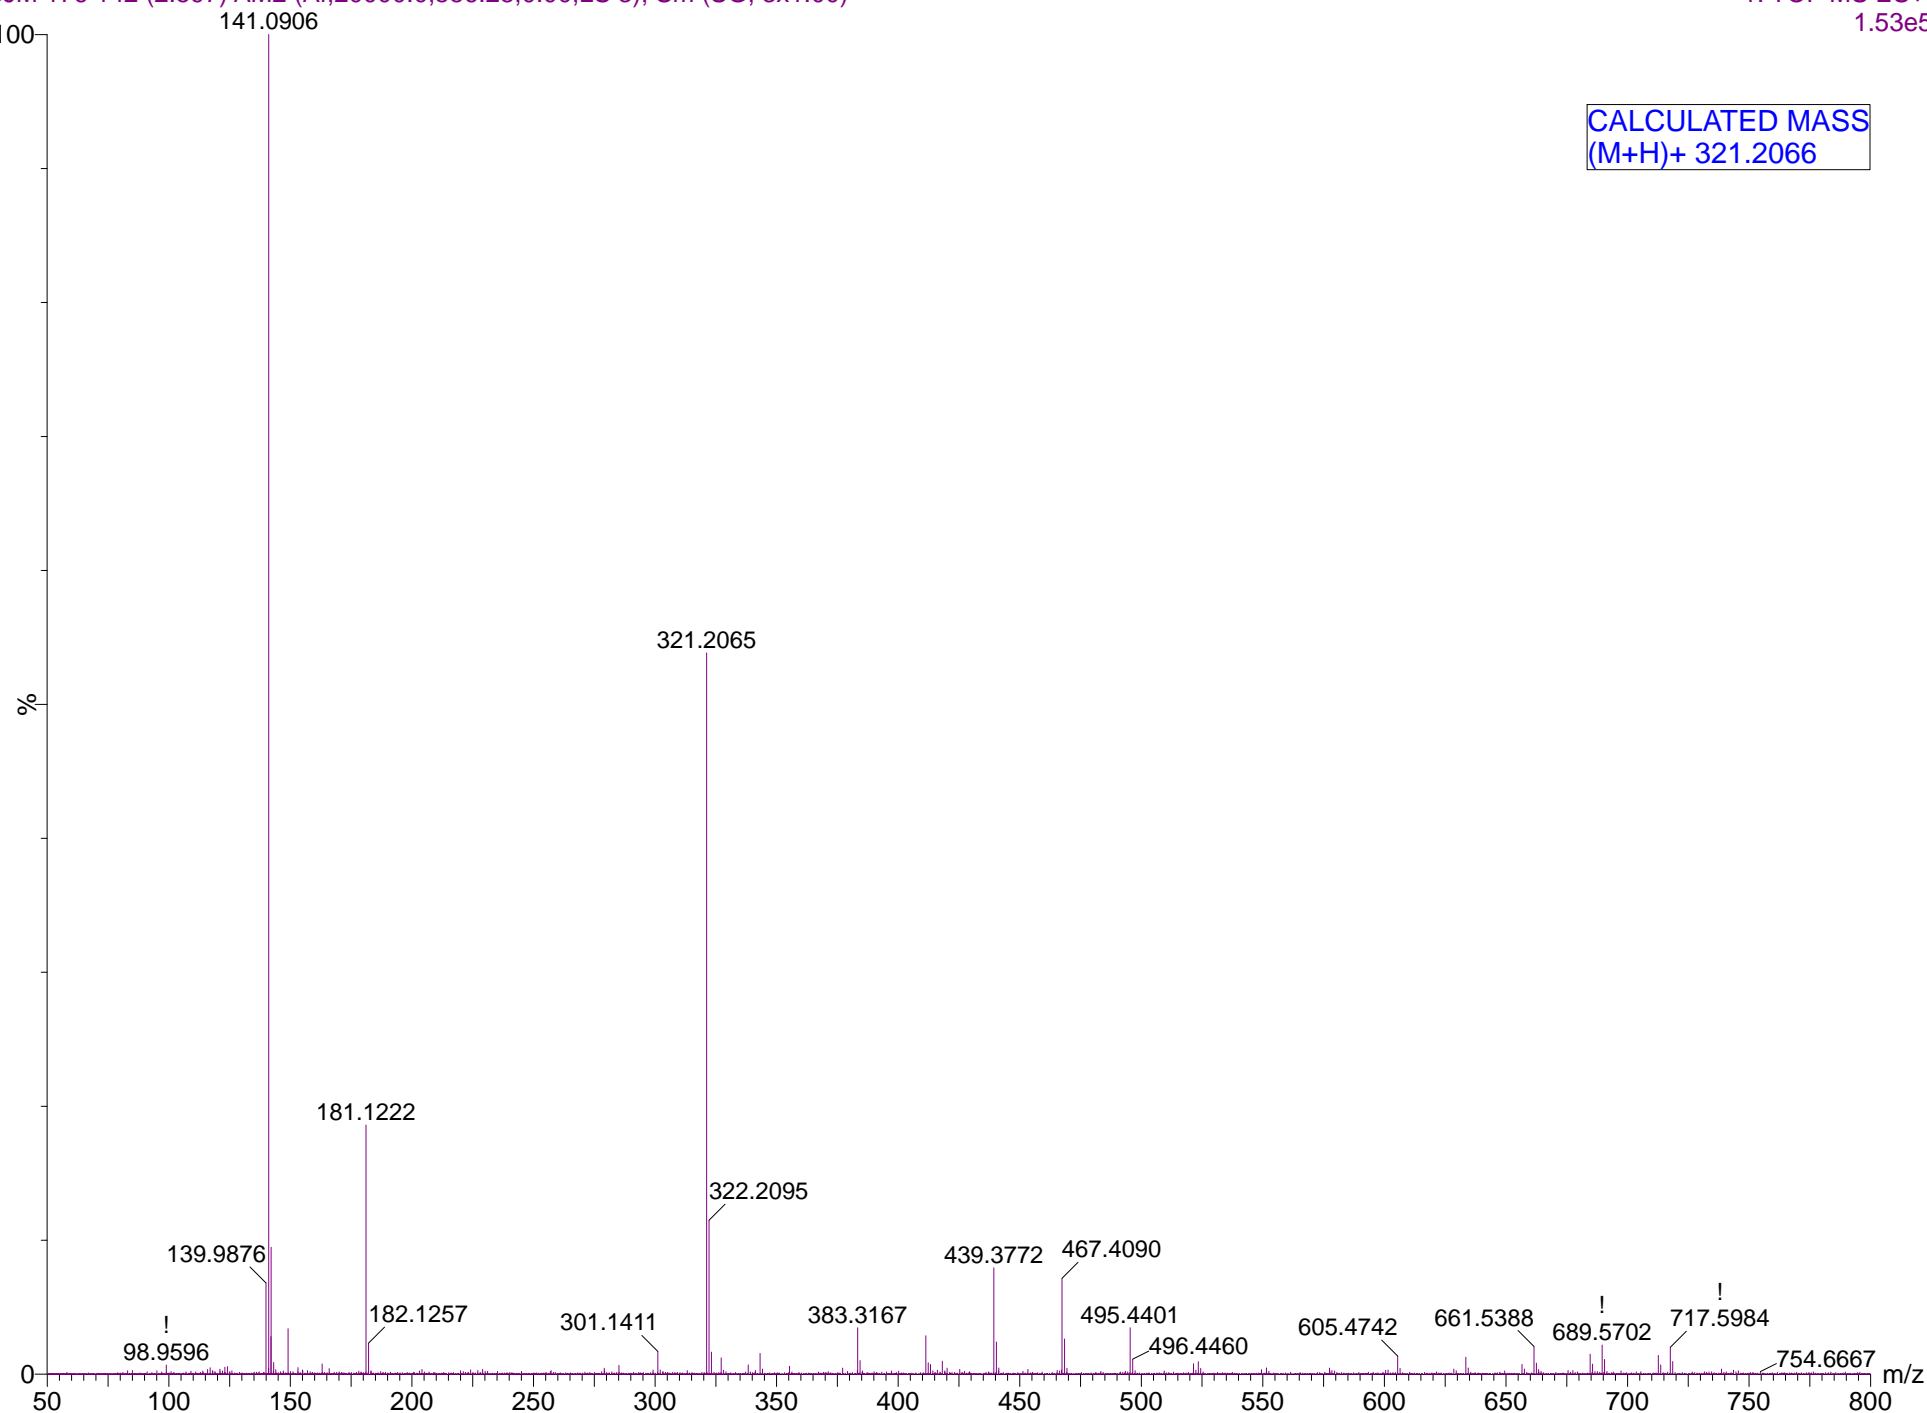

Supplement: d2re00452f1.zip [file d2re00452f1.zip]

SJM 306

SJM 306 124 (2.270) AM2 (Ar,20000.0,556.28,0.00,LS 3); Sm (SG, 3x1.00)

IISER PUNE

1: TOF MS ES+  
6.75e5

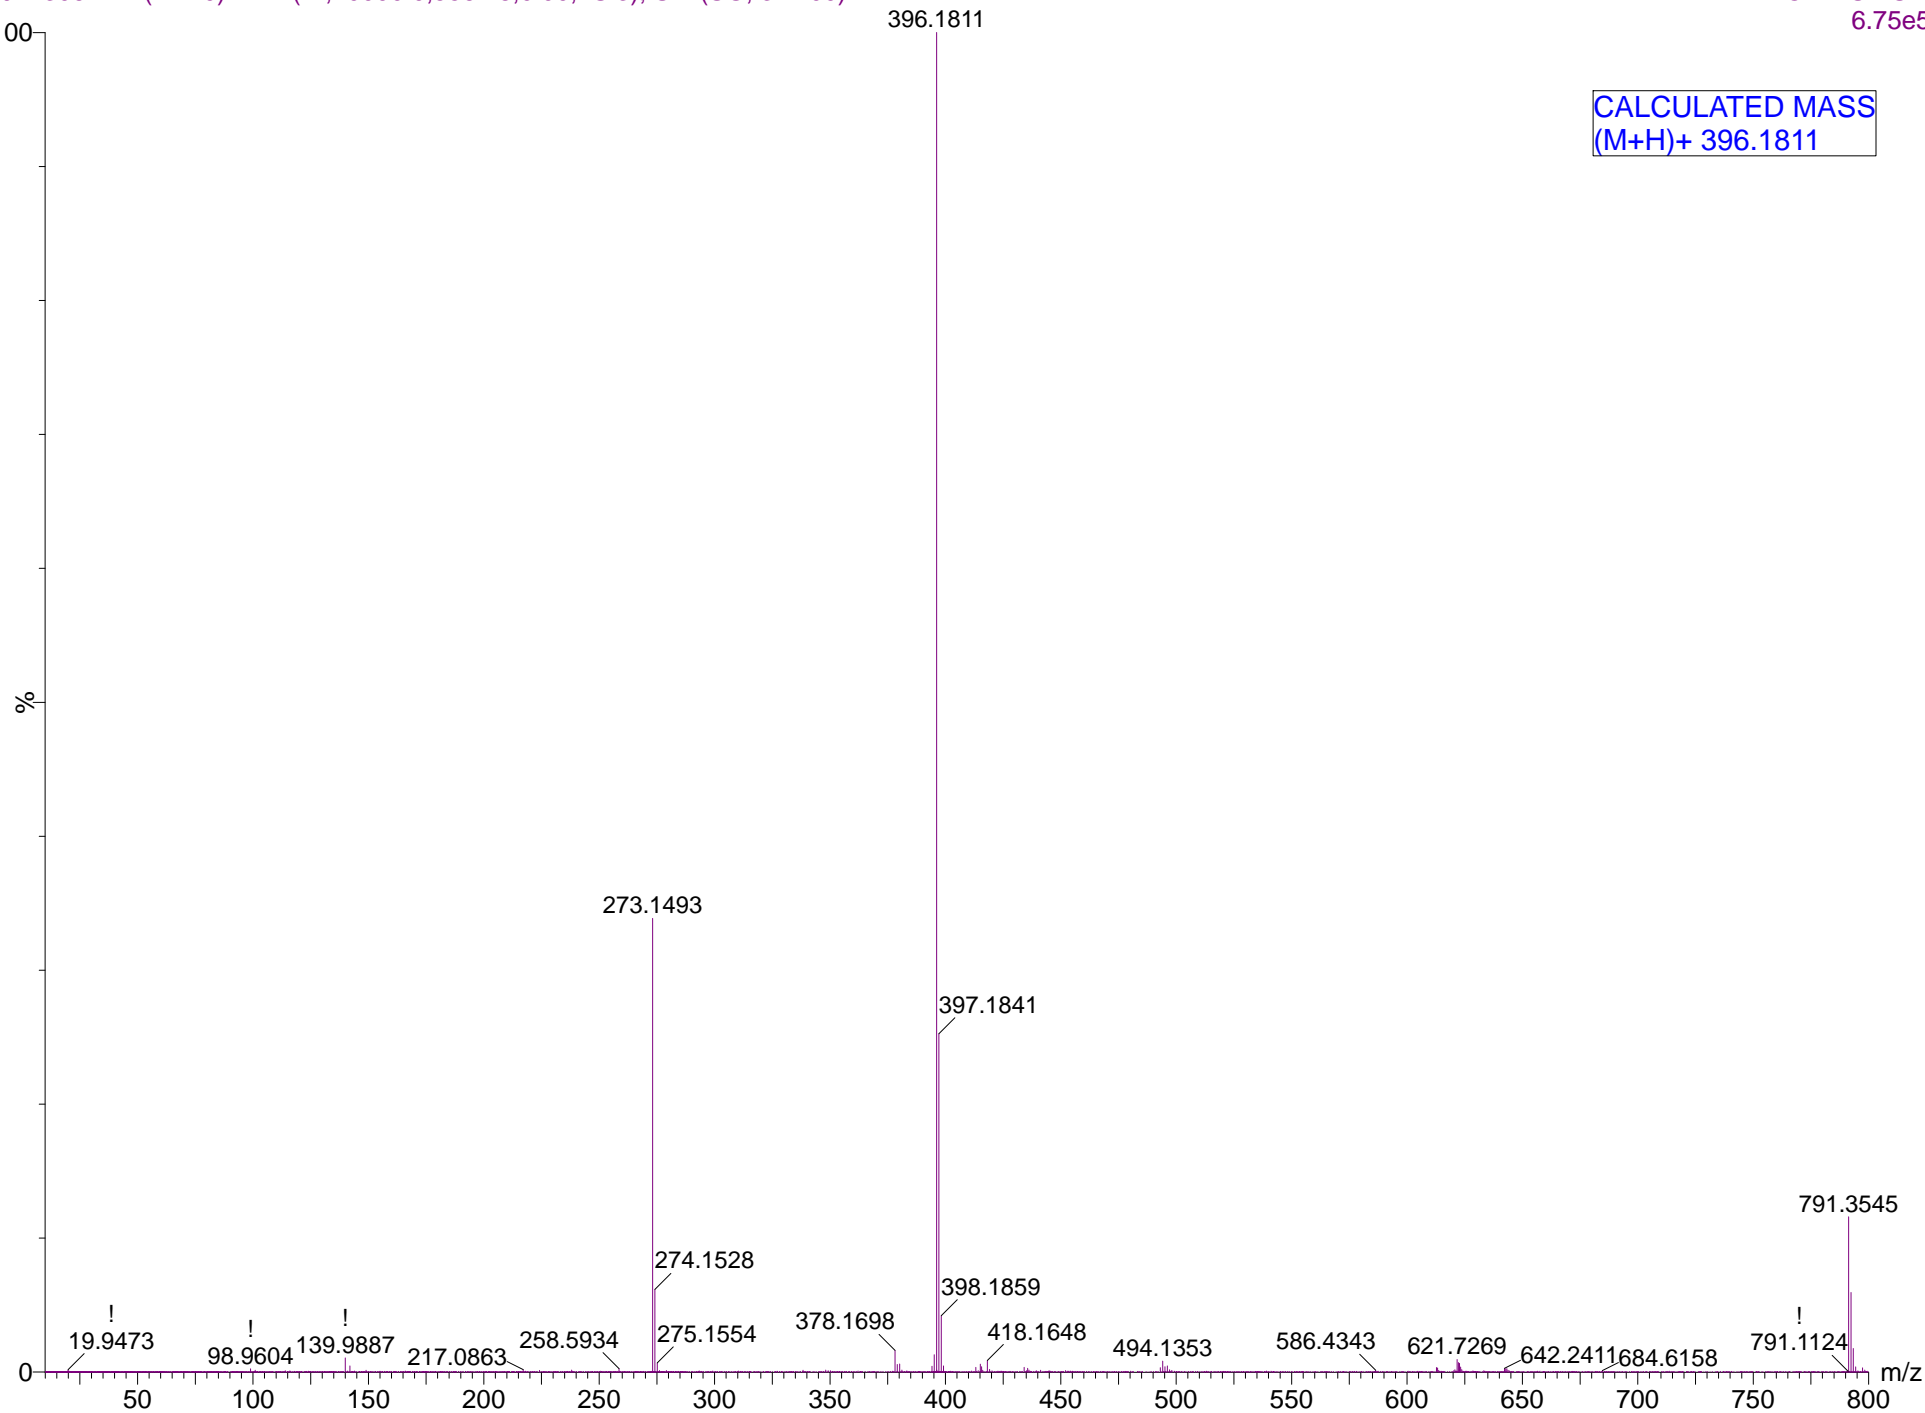

Supplement: d2re00452f1.zip [file d2re00452f1.zip]

SJM 185

IISER PUNE

SJM 185 163 (2.994) AM2 (Ar,20000.0,556.28,0.00,LS 3); Sm (SG, 3x1.00); Cm (163:167)

1: TOF MS ES+  
1.11e5

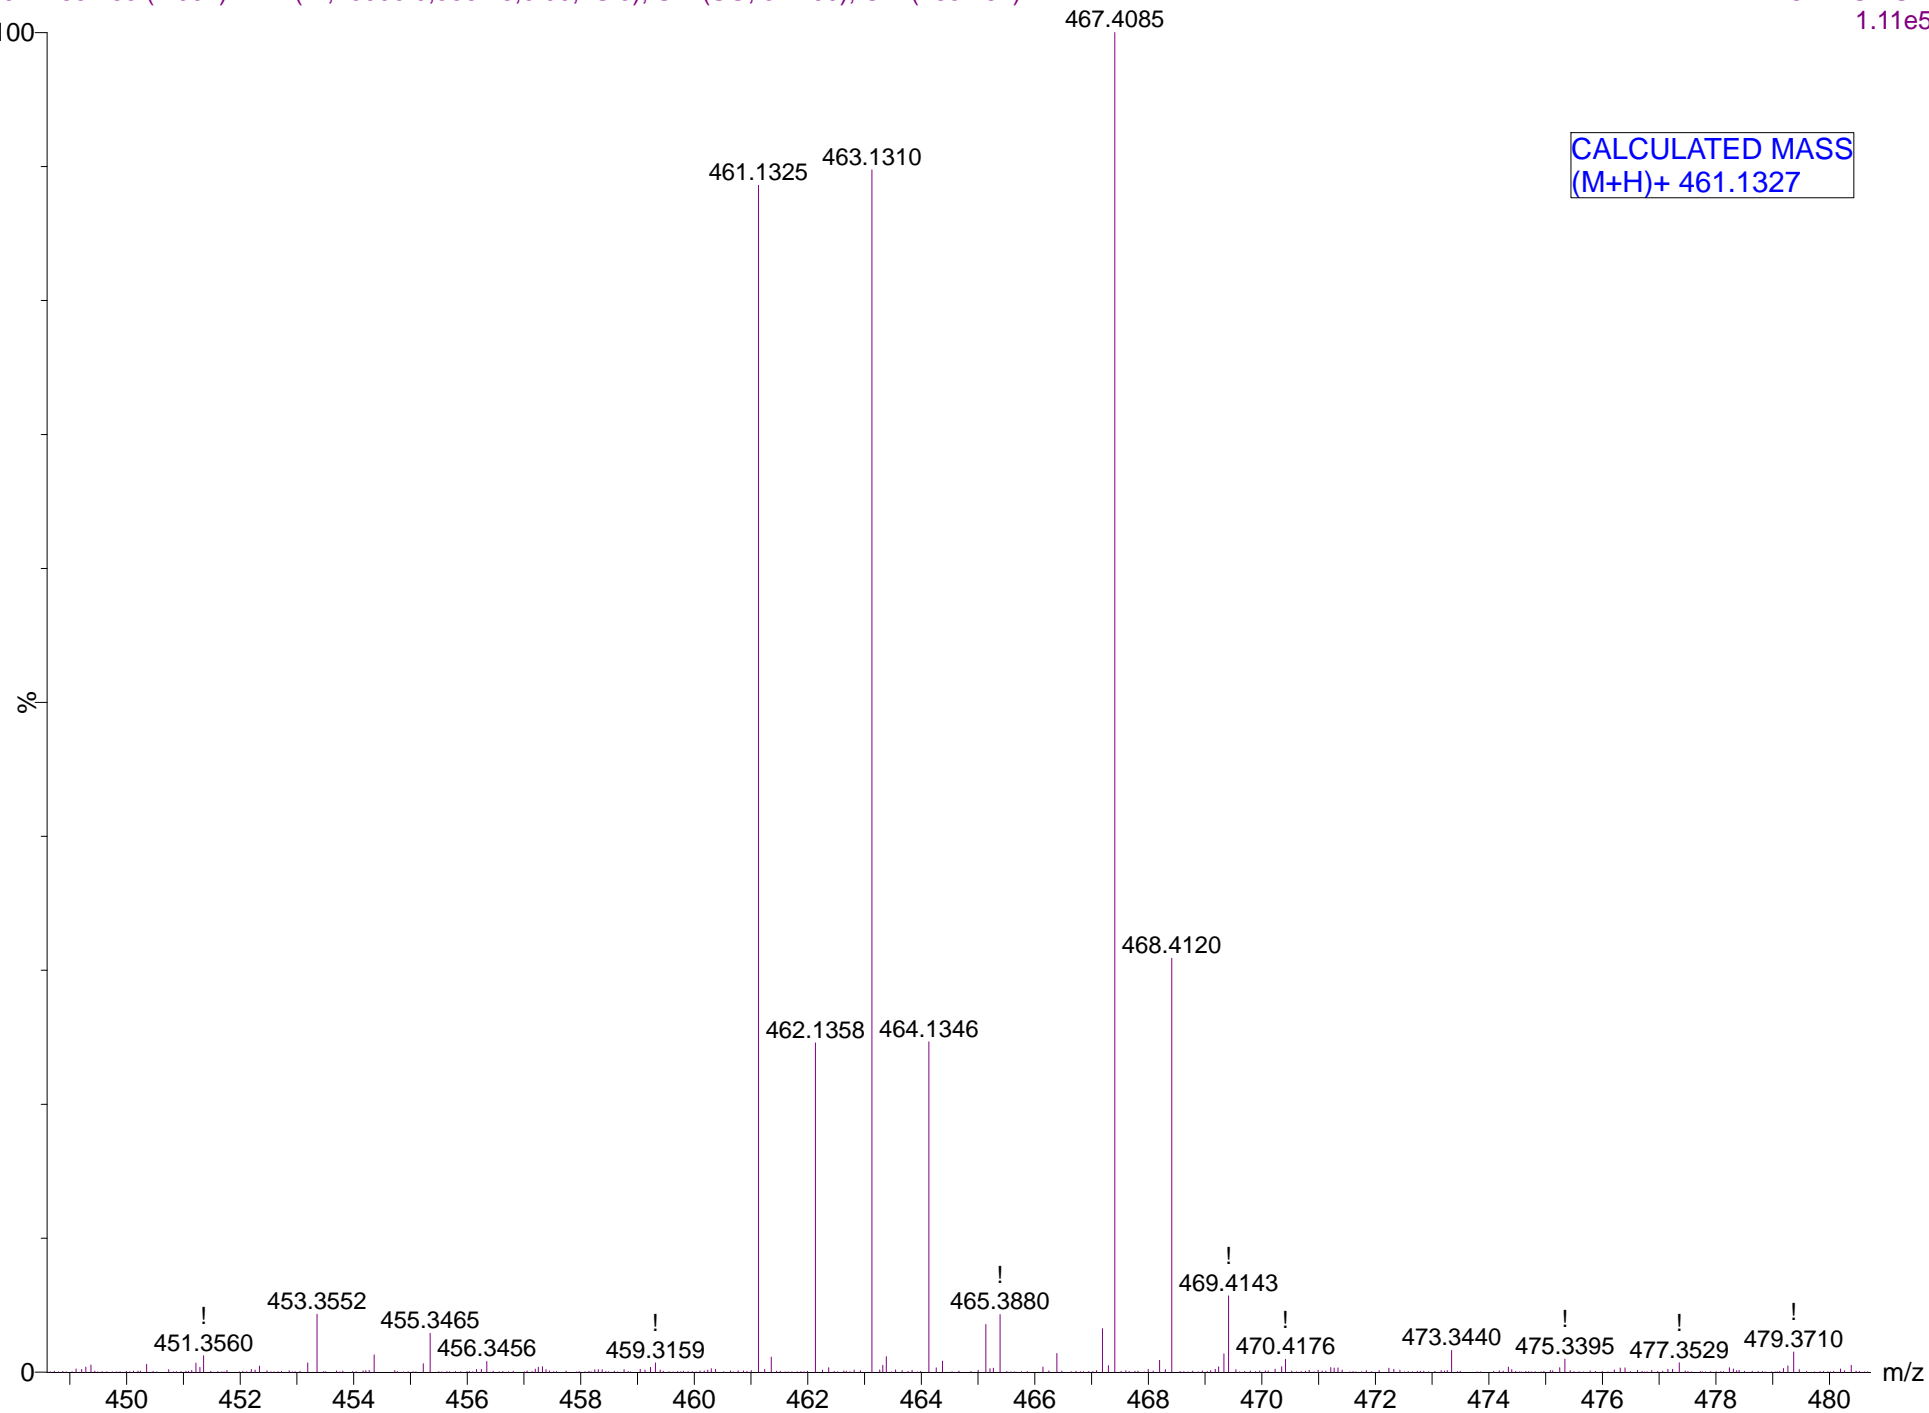

Supplement: d2re00452f1.zip [file d2re00452f1.zip]

SJM 50

IISER PUNE

SJM 50 152 (2.787) AM2 (Ar,20000.0,556.28,0.00,LS 3); Sm (SG, 3x1.00)

1: TOF MS ES+  
9.46e4

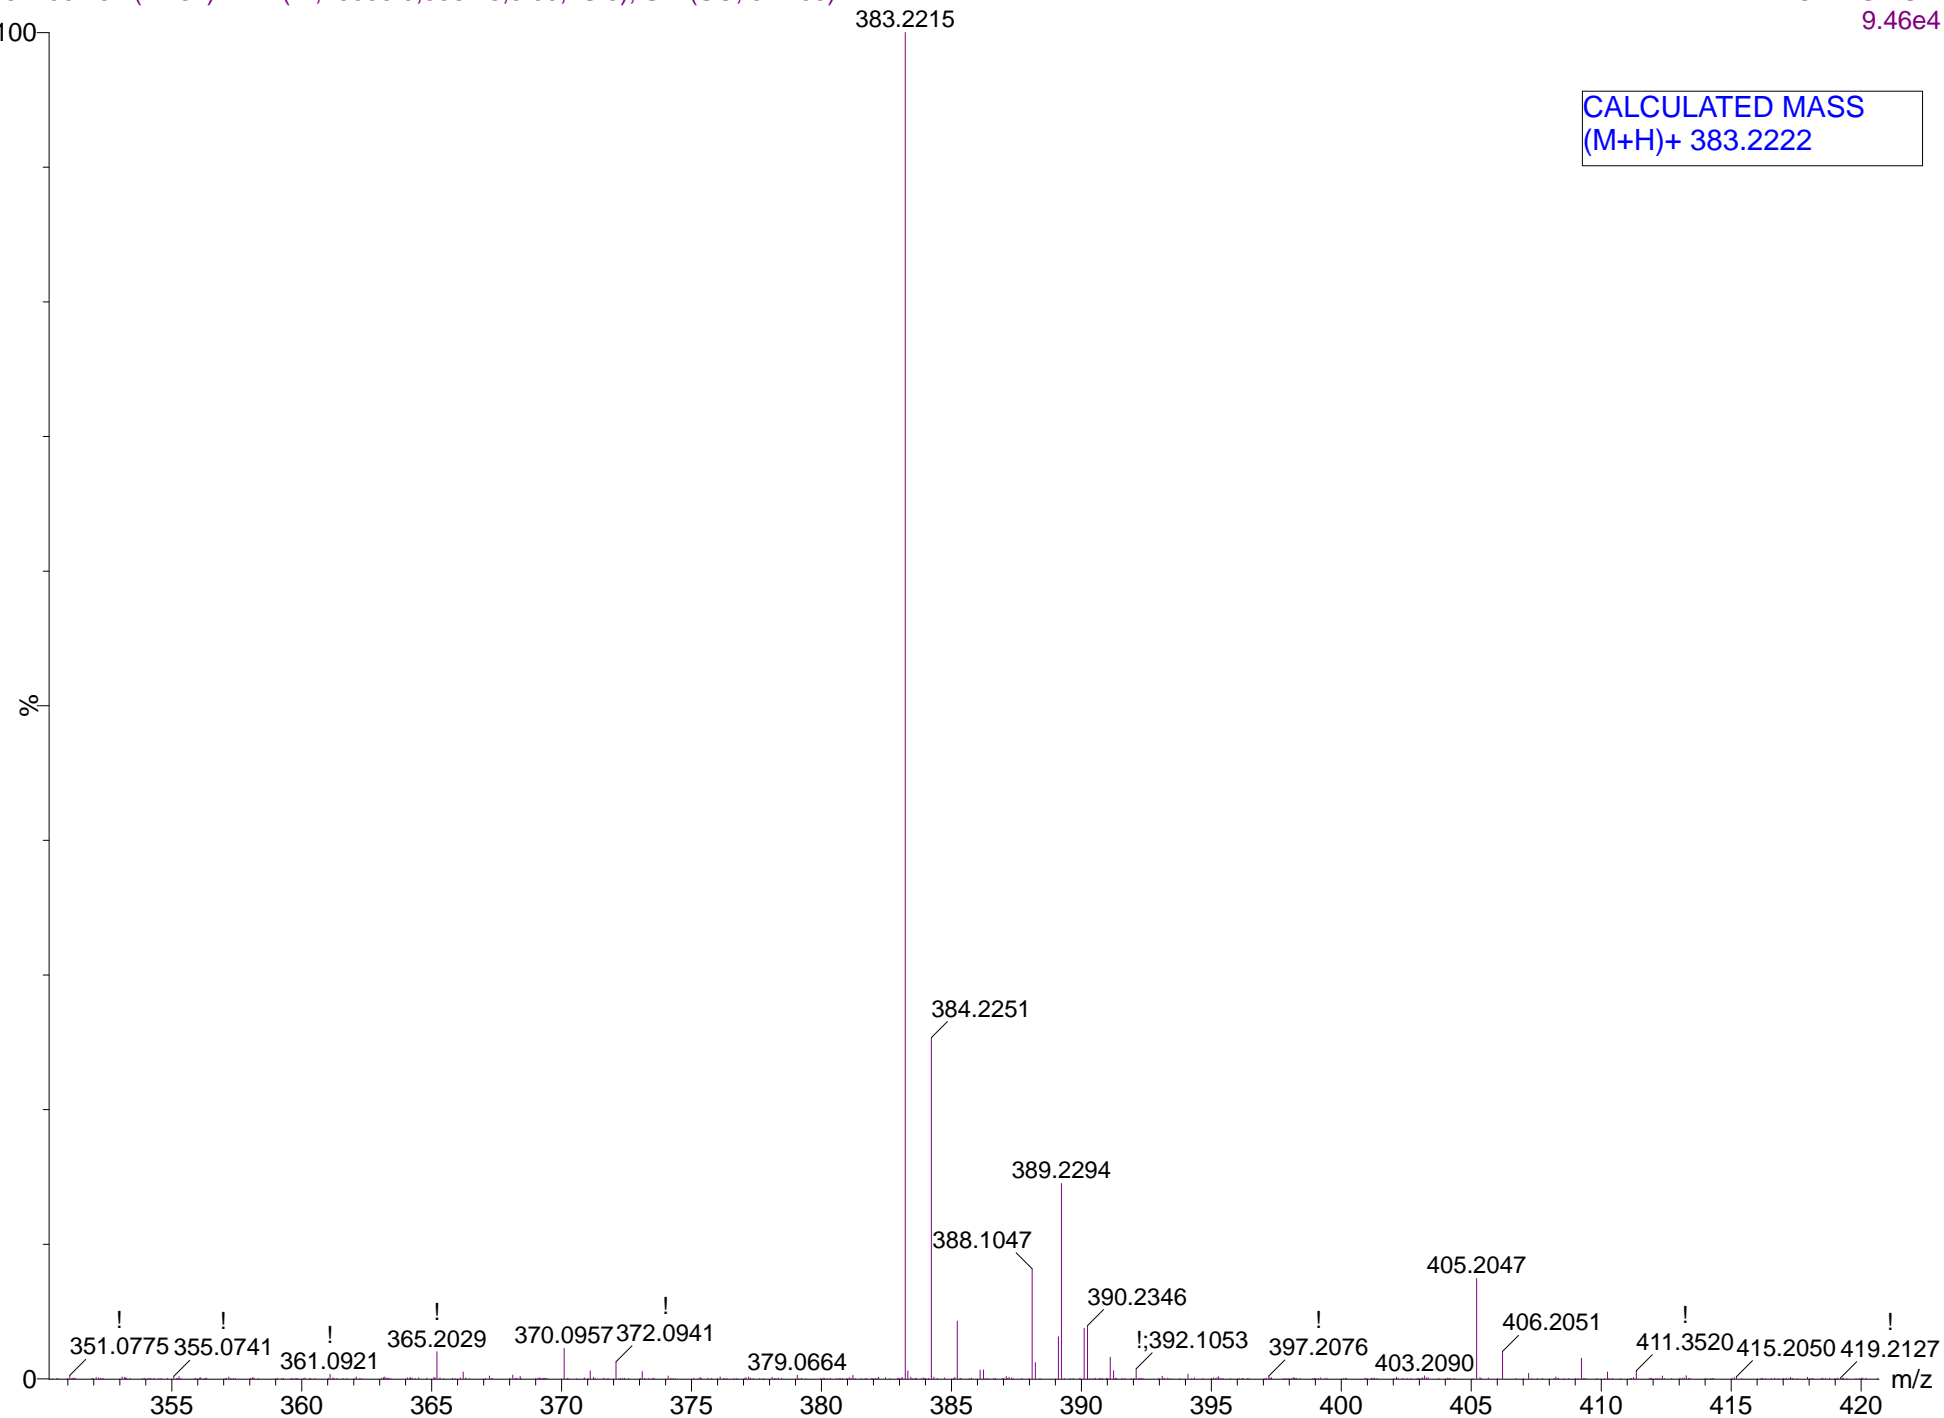

Supplement: d2re00452f1.zip [file d2re00452f1.zip]

SJM 81

IISER PUNE

SJM 81 97 (1.789) AM2 (Ar,20000.0,556.28,0.00,LS 3); ABS; Sm (SG, 3x1.00)

1: TOF MS ES+  
1.81e6

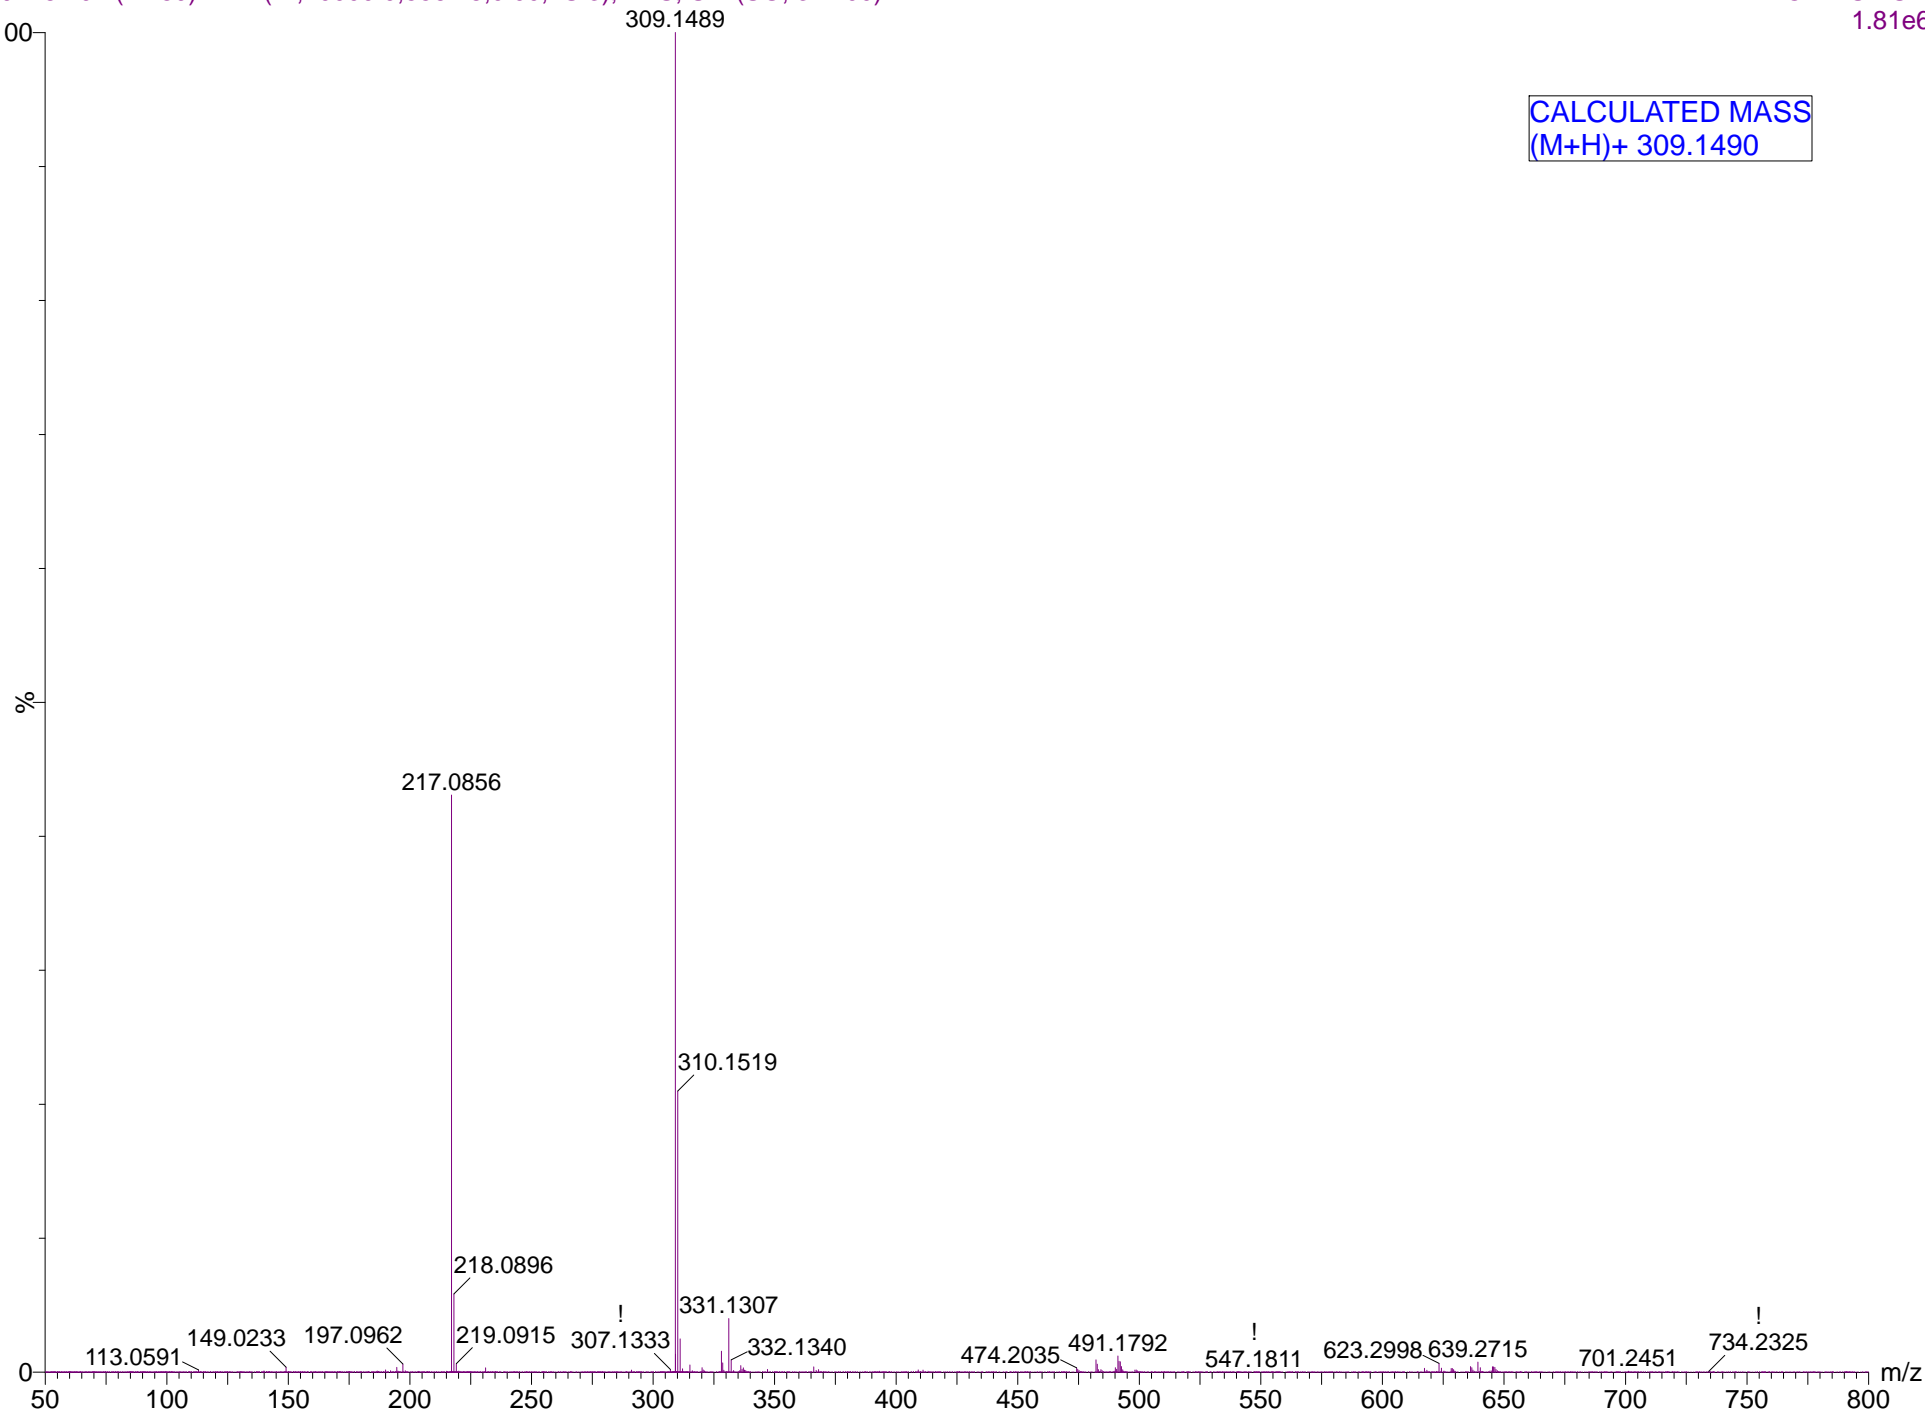

Supplement: d2re00452f1.zip [file d2re00452f1.zip]

SJM 197

IISER PUNE

SJM 197 143 (2.614) AM2 (Ar,20000.0,556.28,0.00,LS 3); Sm (SG, 3x1.00)

1: TOF MS ES+  
2.30e5

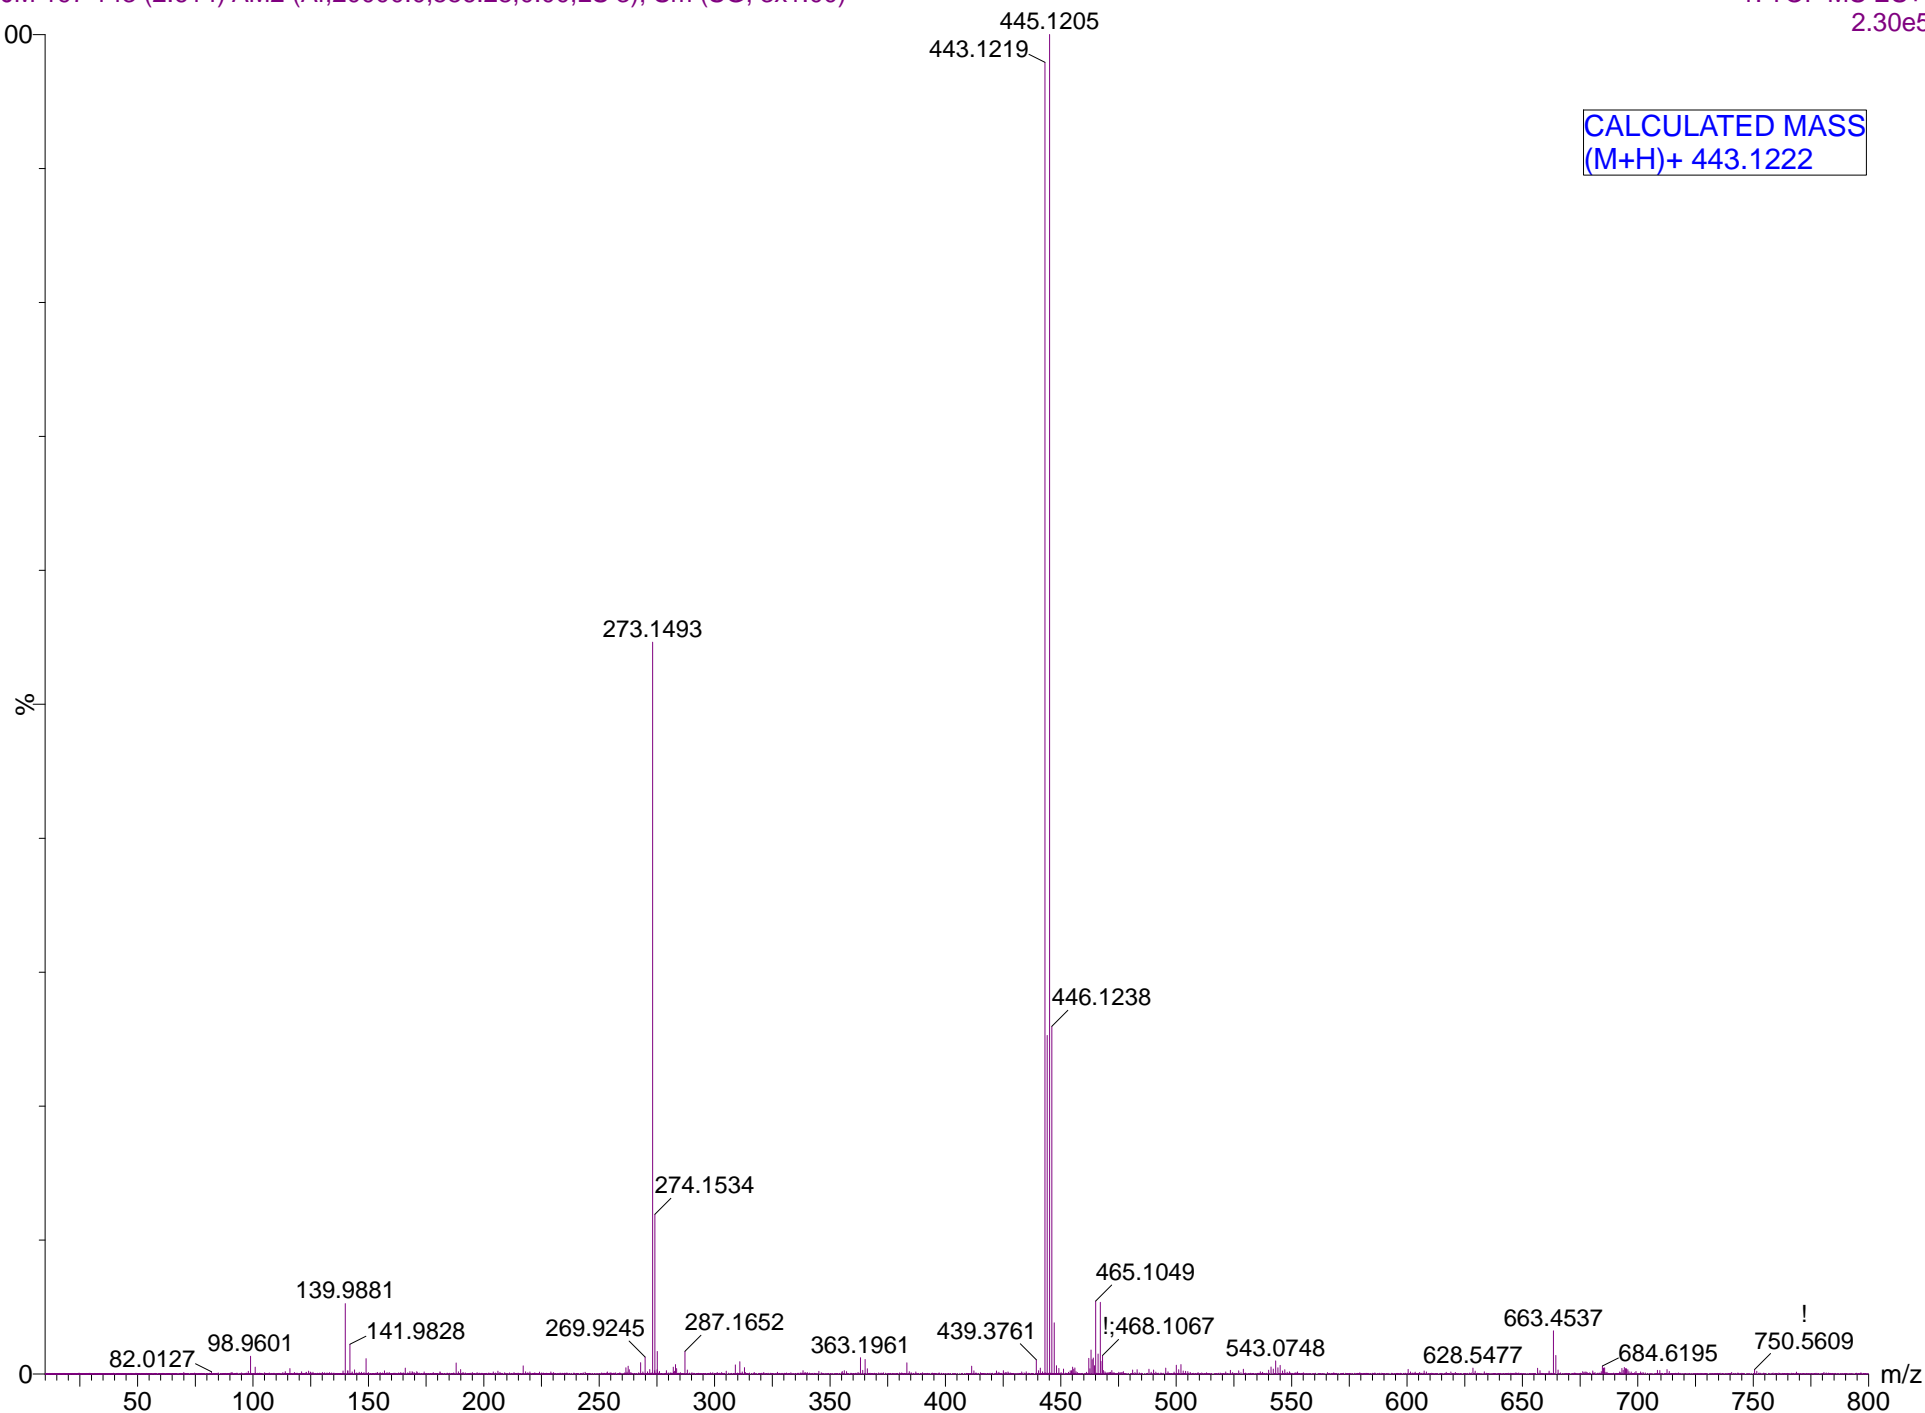

Supplement: d2re00452f1.zip [file d2re00452f1.zip]

SJM 290

IISER PUNE

SJM 290 82 (1.514) AM2 (Ar,20000.0,556.28,0.00,LS 3); Sm (SG, 3x1.00)

1: TOF MS ES+  
6.13e3

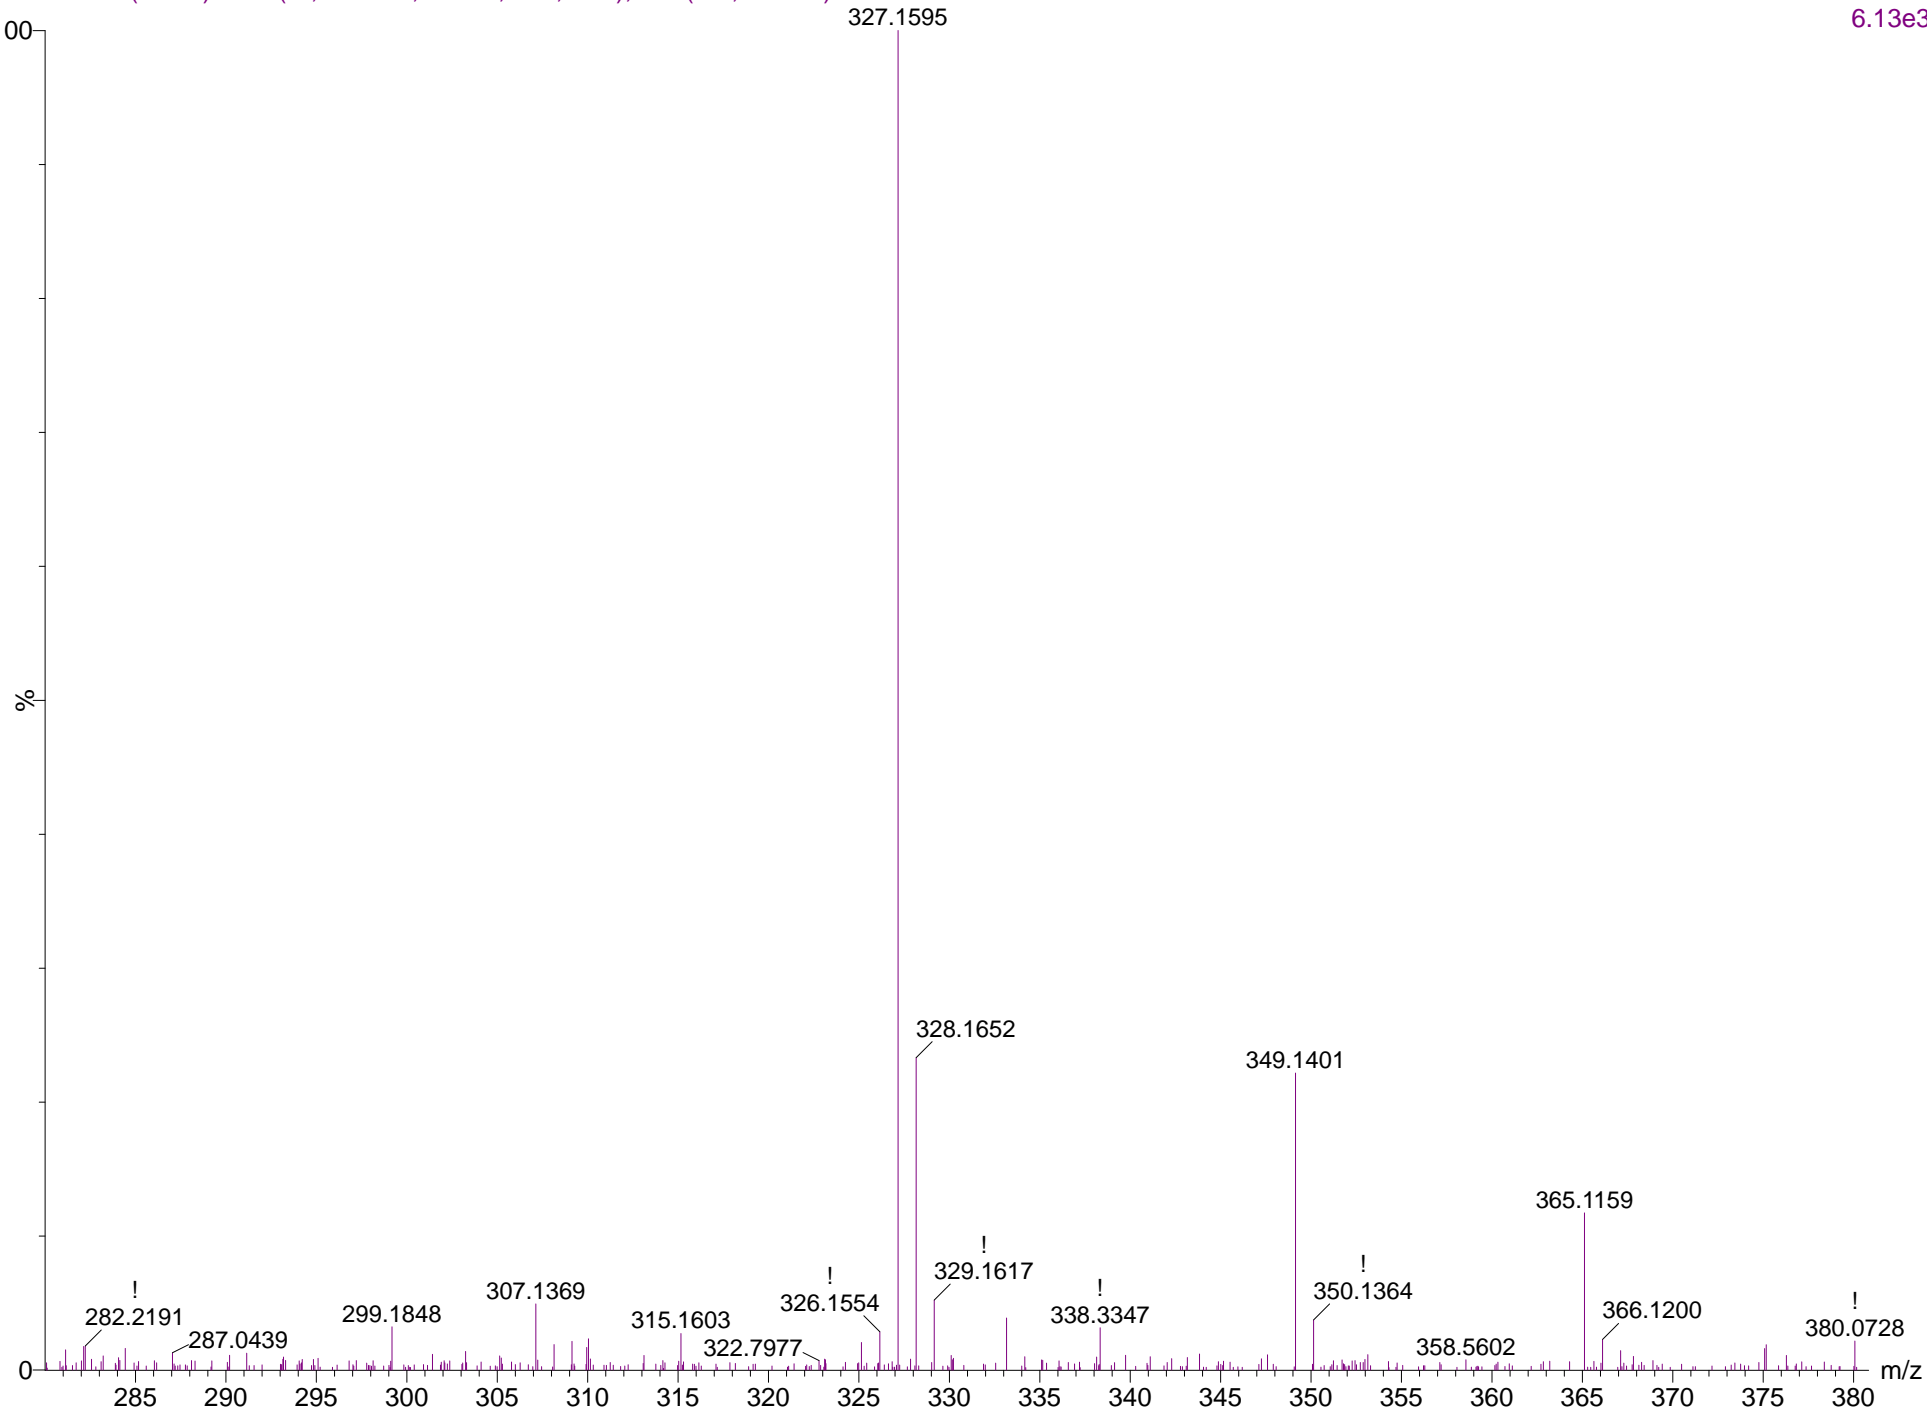

Supplement: d2re00452f1.zip [file d2re00452f1.zip]

SJM 42

IISER PUNE

SJM 42 109 (2.014) AM2 (Ar,20000.0,556.28,0.00,LS 3); Sm (SG, 3x1.00); Cm (84:124)

1: TOF MS ES+  
2.25e5

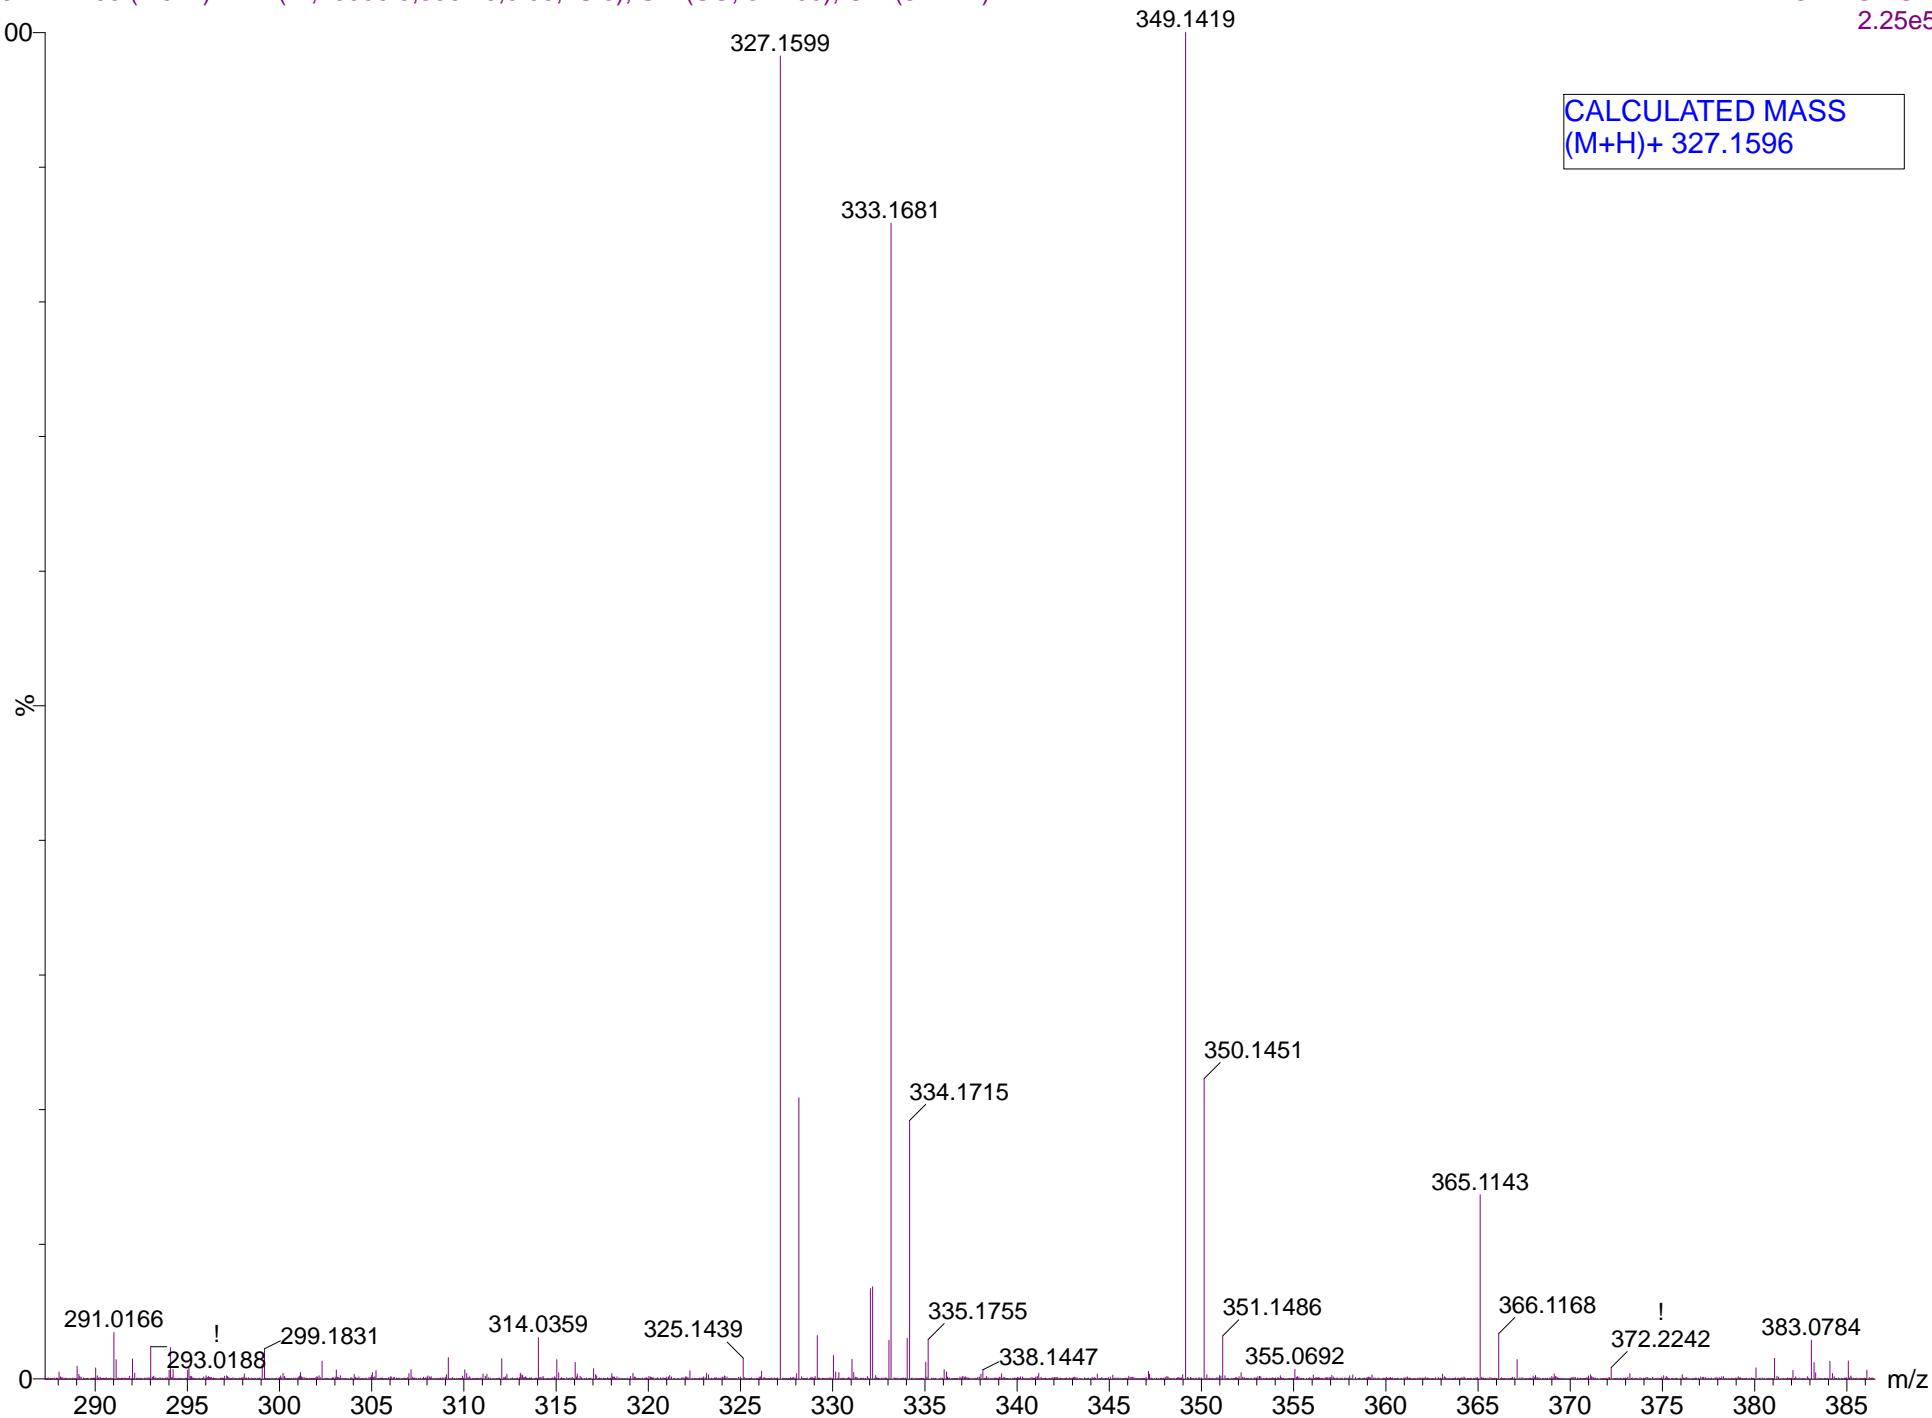

Supplement: d2re00452f1.zip [file d2re00452f1.zip]

SJM 307

IISER PUNE

SJM 307 98 (1.806) AM2 (Ar,20000.0,556.28,0.00,LS 3); Sm (SG, 3x1.00)

1: TOF MS ES+  
1.10e4

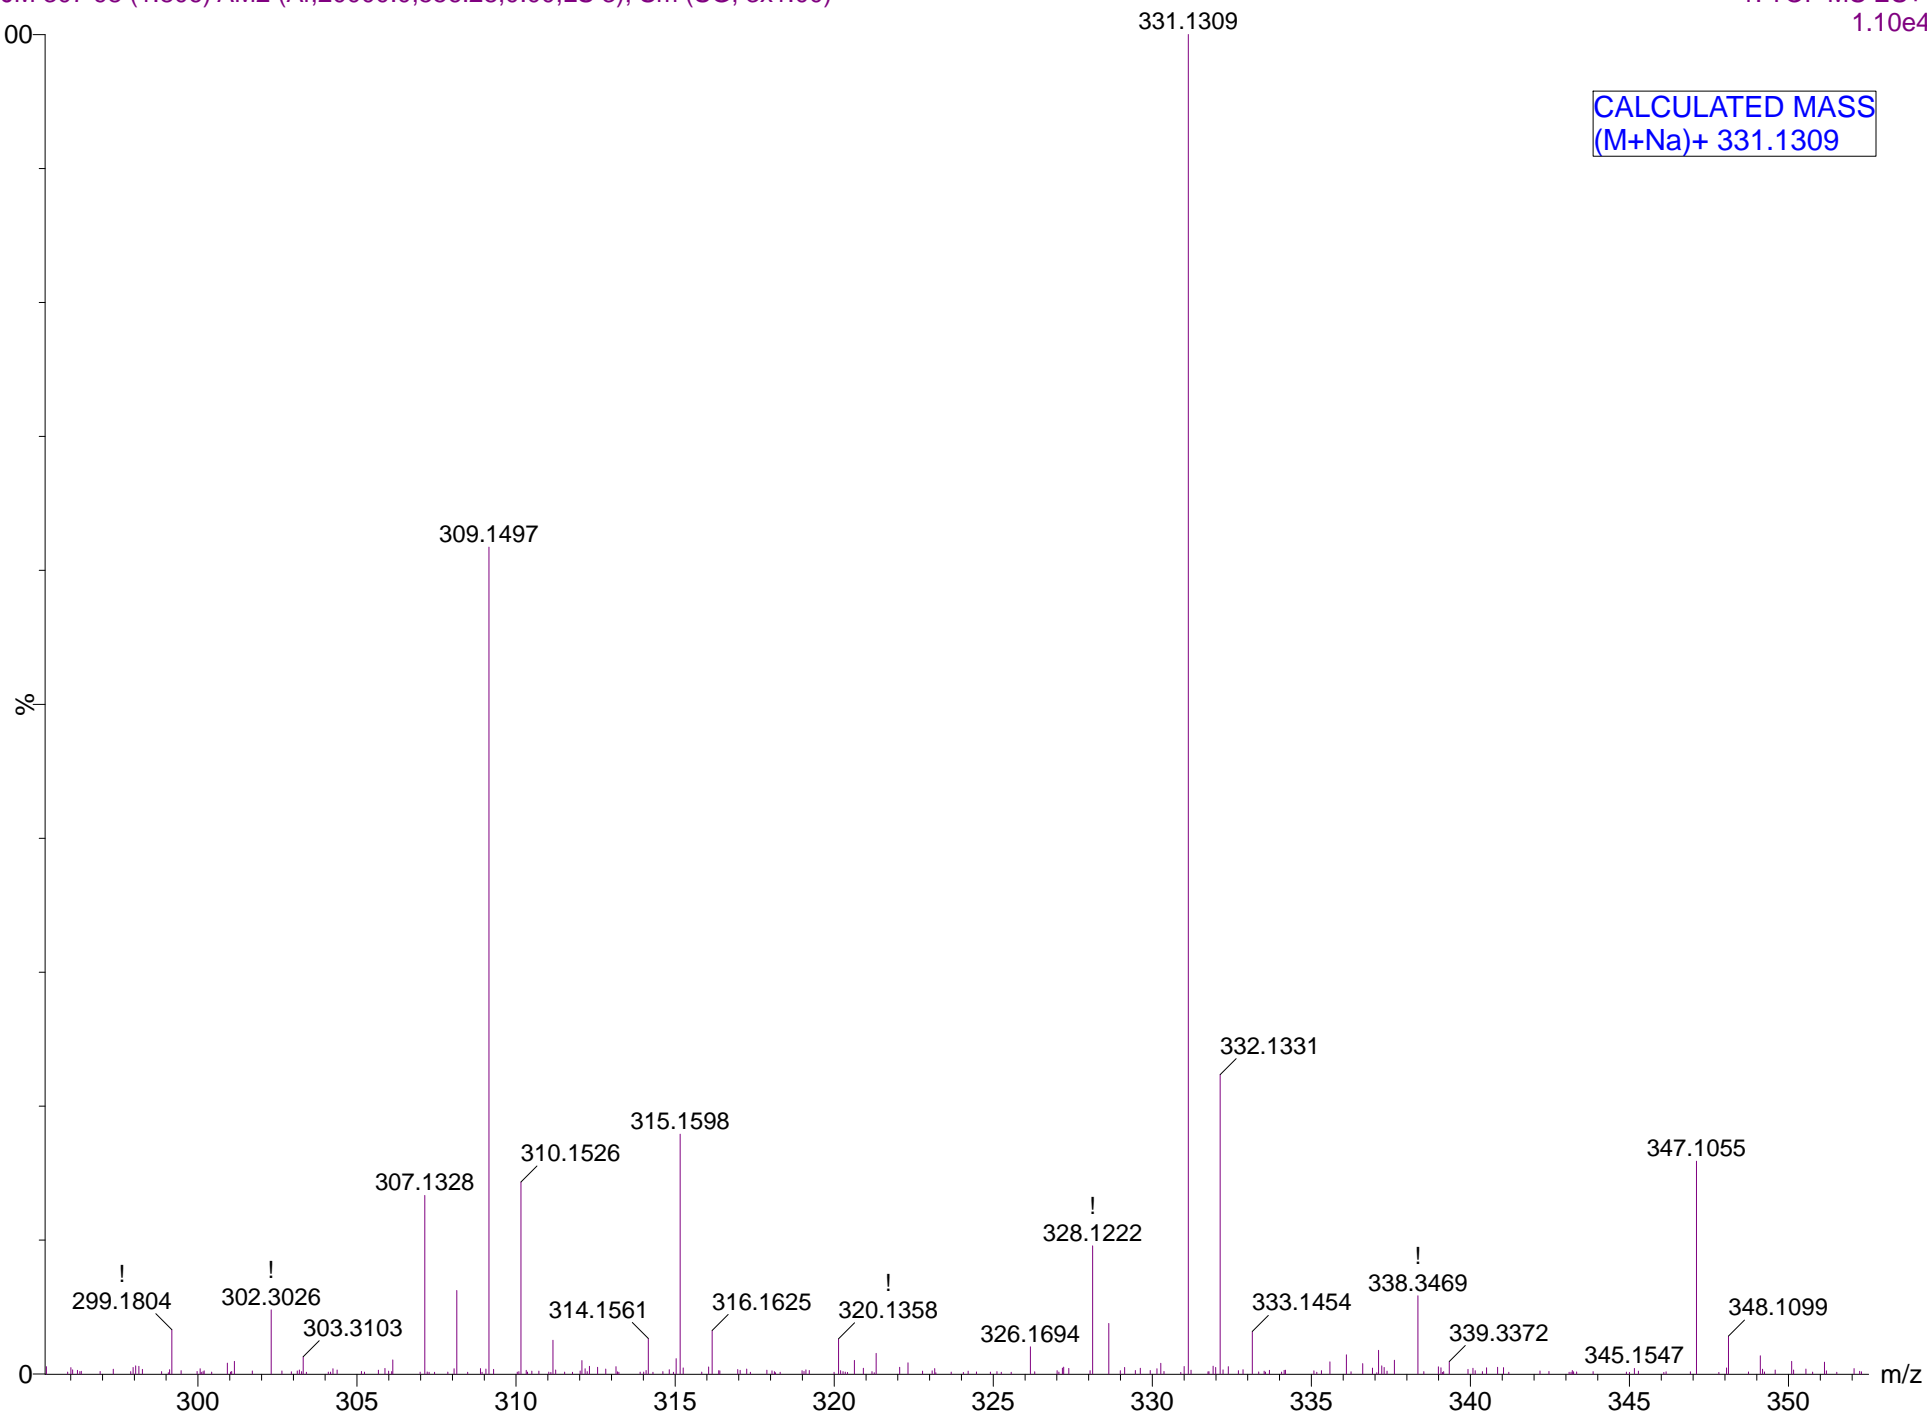

Supplement: d2re00452f1.zip [file d2re00452f1.zip]

SJM 41

IISER PUNE

SJM 41 118 (2.167) AM2 (Ar,20000.0,556.28,0.00,LS 3); Sm (SG, 3x1.00); Cm (116:122)

1: TOF MS ES+  
3.80e6

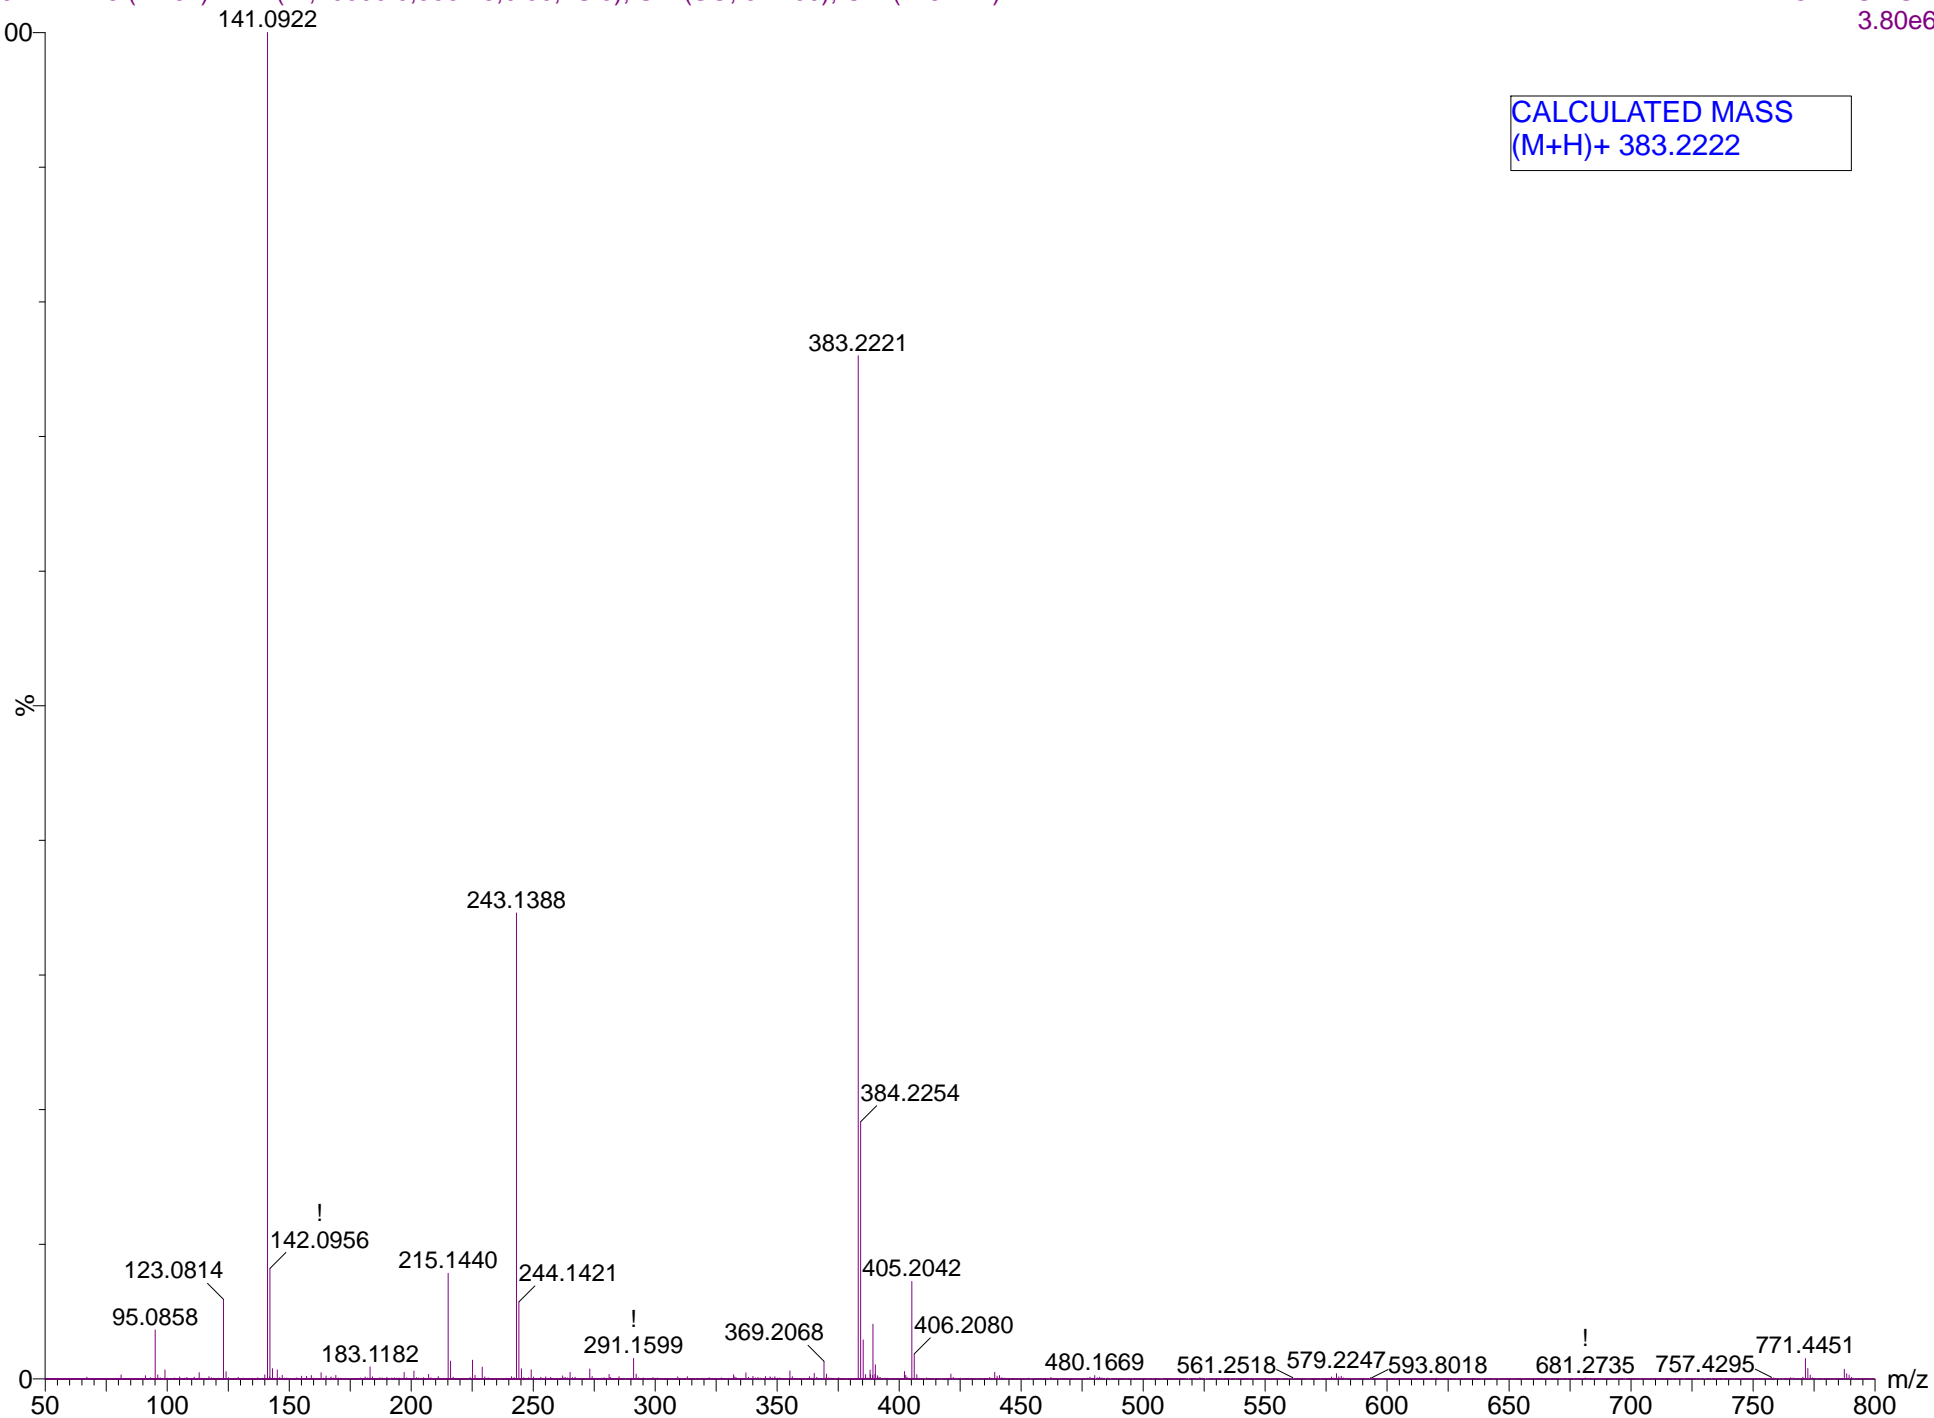

Supplement: d2re00452f1.zip [file d2re00452f1.zip]

SJM 157

IISER PUNE

SJM 157 106 (1.943) AM2 (Ar,20000.0,556.28,0.00,LS 3); ABS; Sm (SG, 3x1.00)

1: TOF MS ES+  
8.47e5

CALCULATED MASS  
(M+H)+ 323.1647

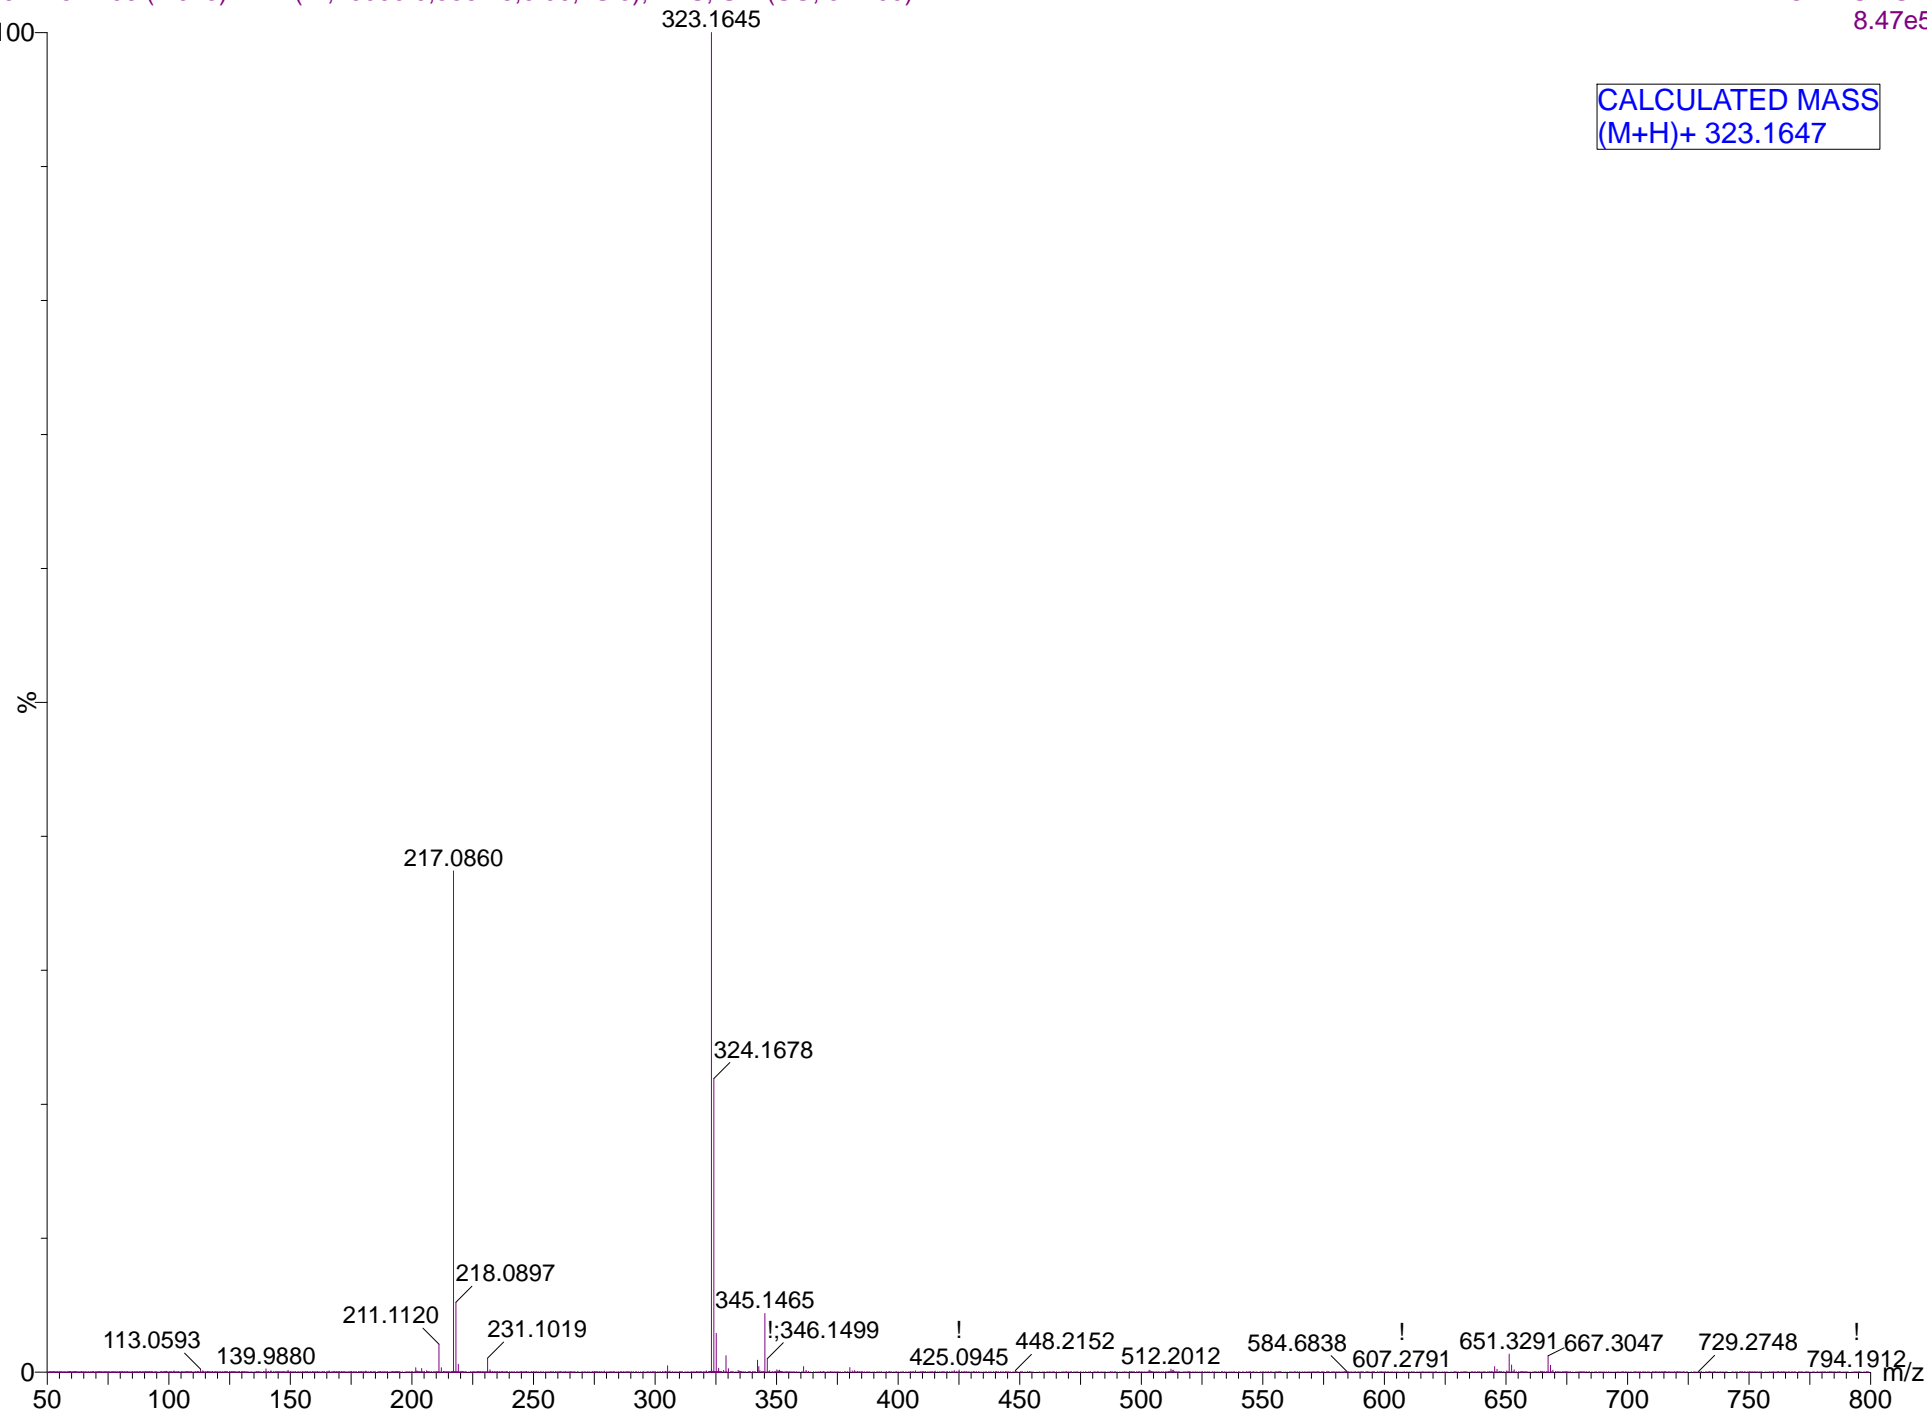

Supplement: d2re00452f1.zip [file d2re00452f1.zip]

SJM 304

IISER PUNE

SJM 304 117 (2.150) AM2 (Ar,20000.0,556.28,0.00,LS 3); Sm (SG, 3x1.00)

1: TOF MS ES+  
1.13e6

CALCULATED MASS  
(M+H)+ 376.1912

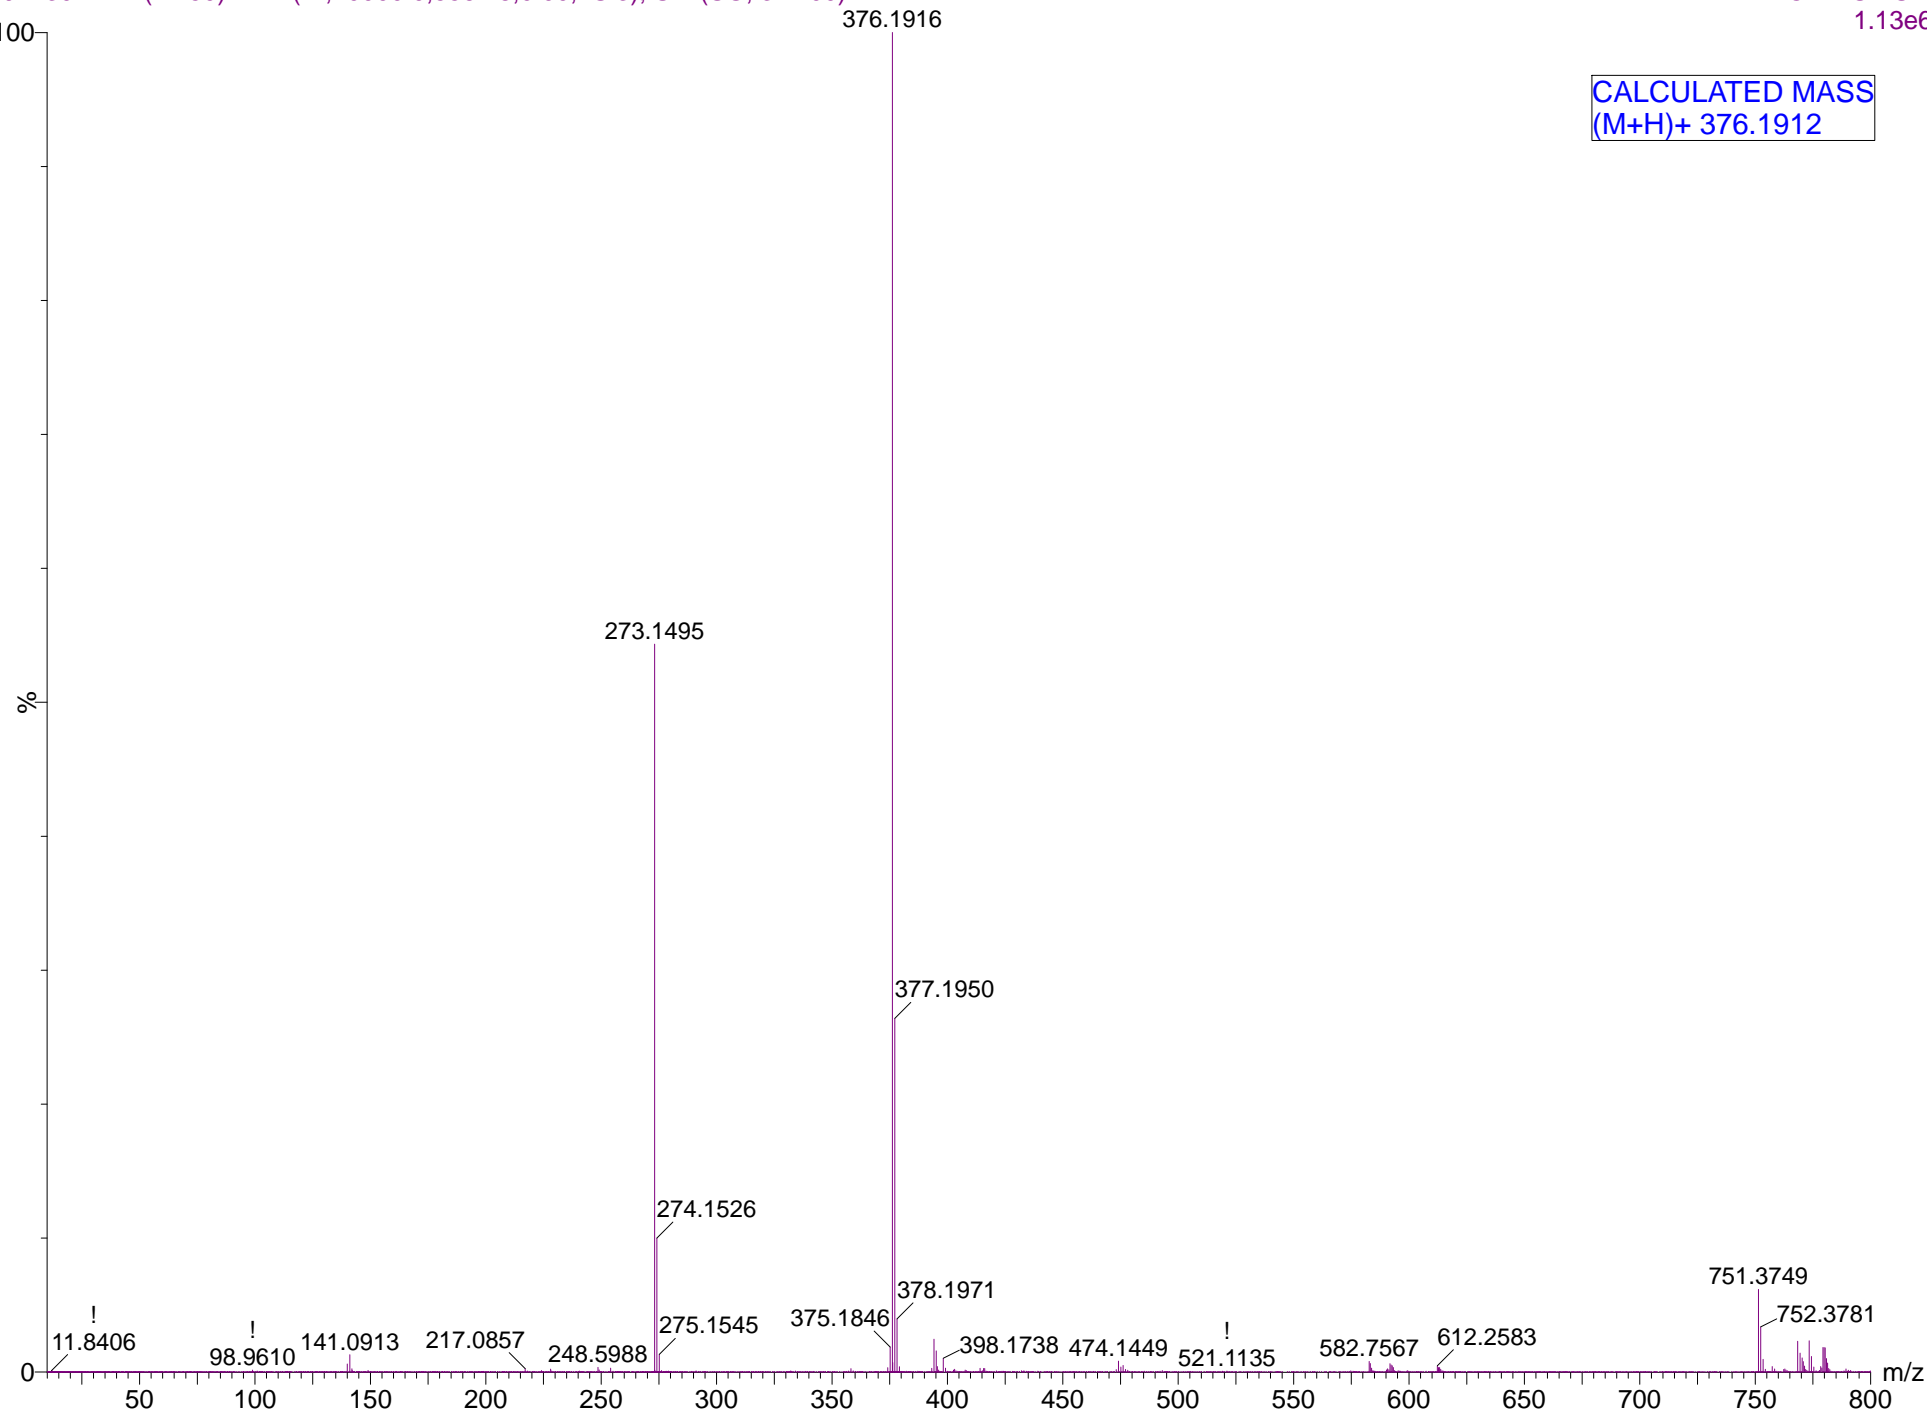

Supplement: d2re00452f1.zip [file d2re00452f1.zip]

SJM 101

IISER PUNE

SJM 101 139 (2.545) AM2 (Ar,20000.0,556.28,0.00,LS 3); ABS; Sm (SG, 3x1.00)

1: TOF MS ES+  
2.45e6

CALCULATED MASS  
(M+H)+ 379.2273

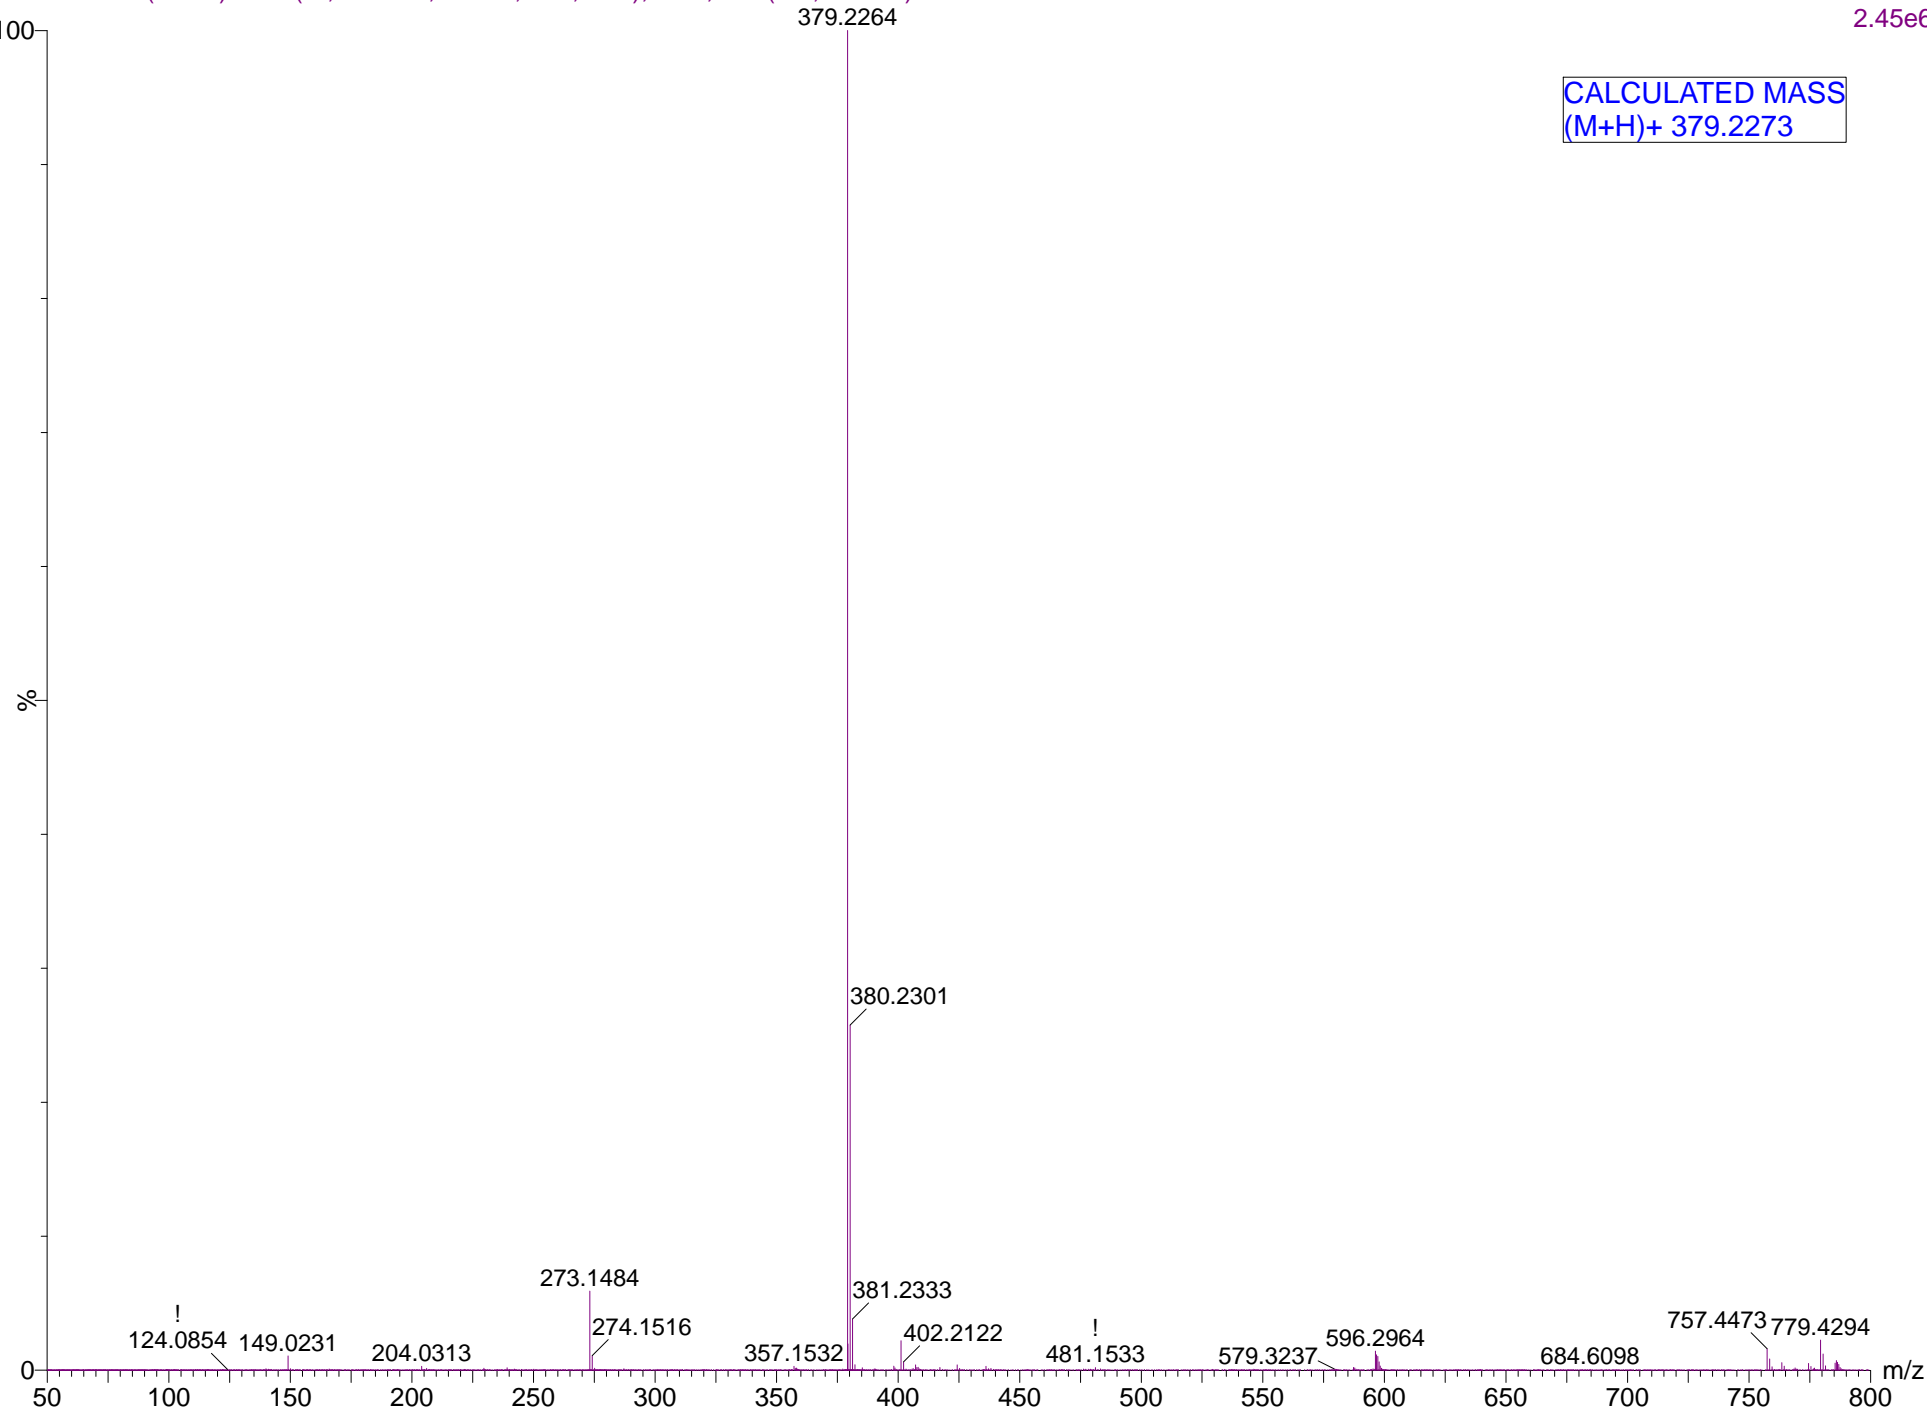

Supplement: d2re00452f1.zip [file d2re00452f1.zip]

SJM 288

IISER PUNE

SJM 288 152 (2.787) AM2 (Ar,20000.0,556.28,0.00,LS 3); Sm (SG, 3x1.00); Cm (143:155)

1: TOF MS ES+  
1.17e6

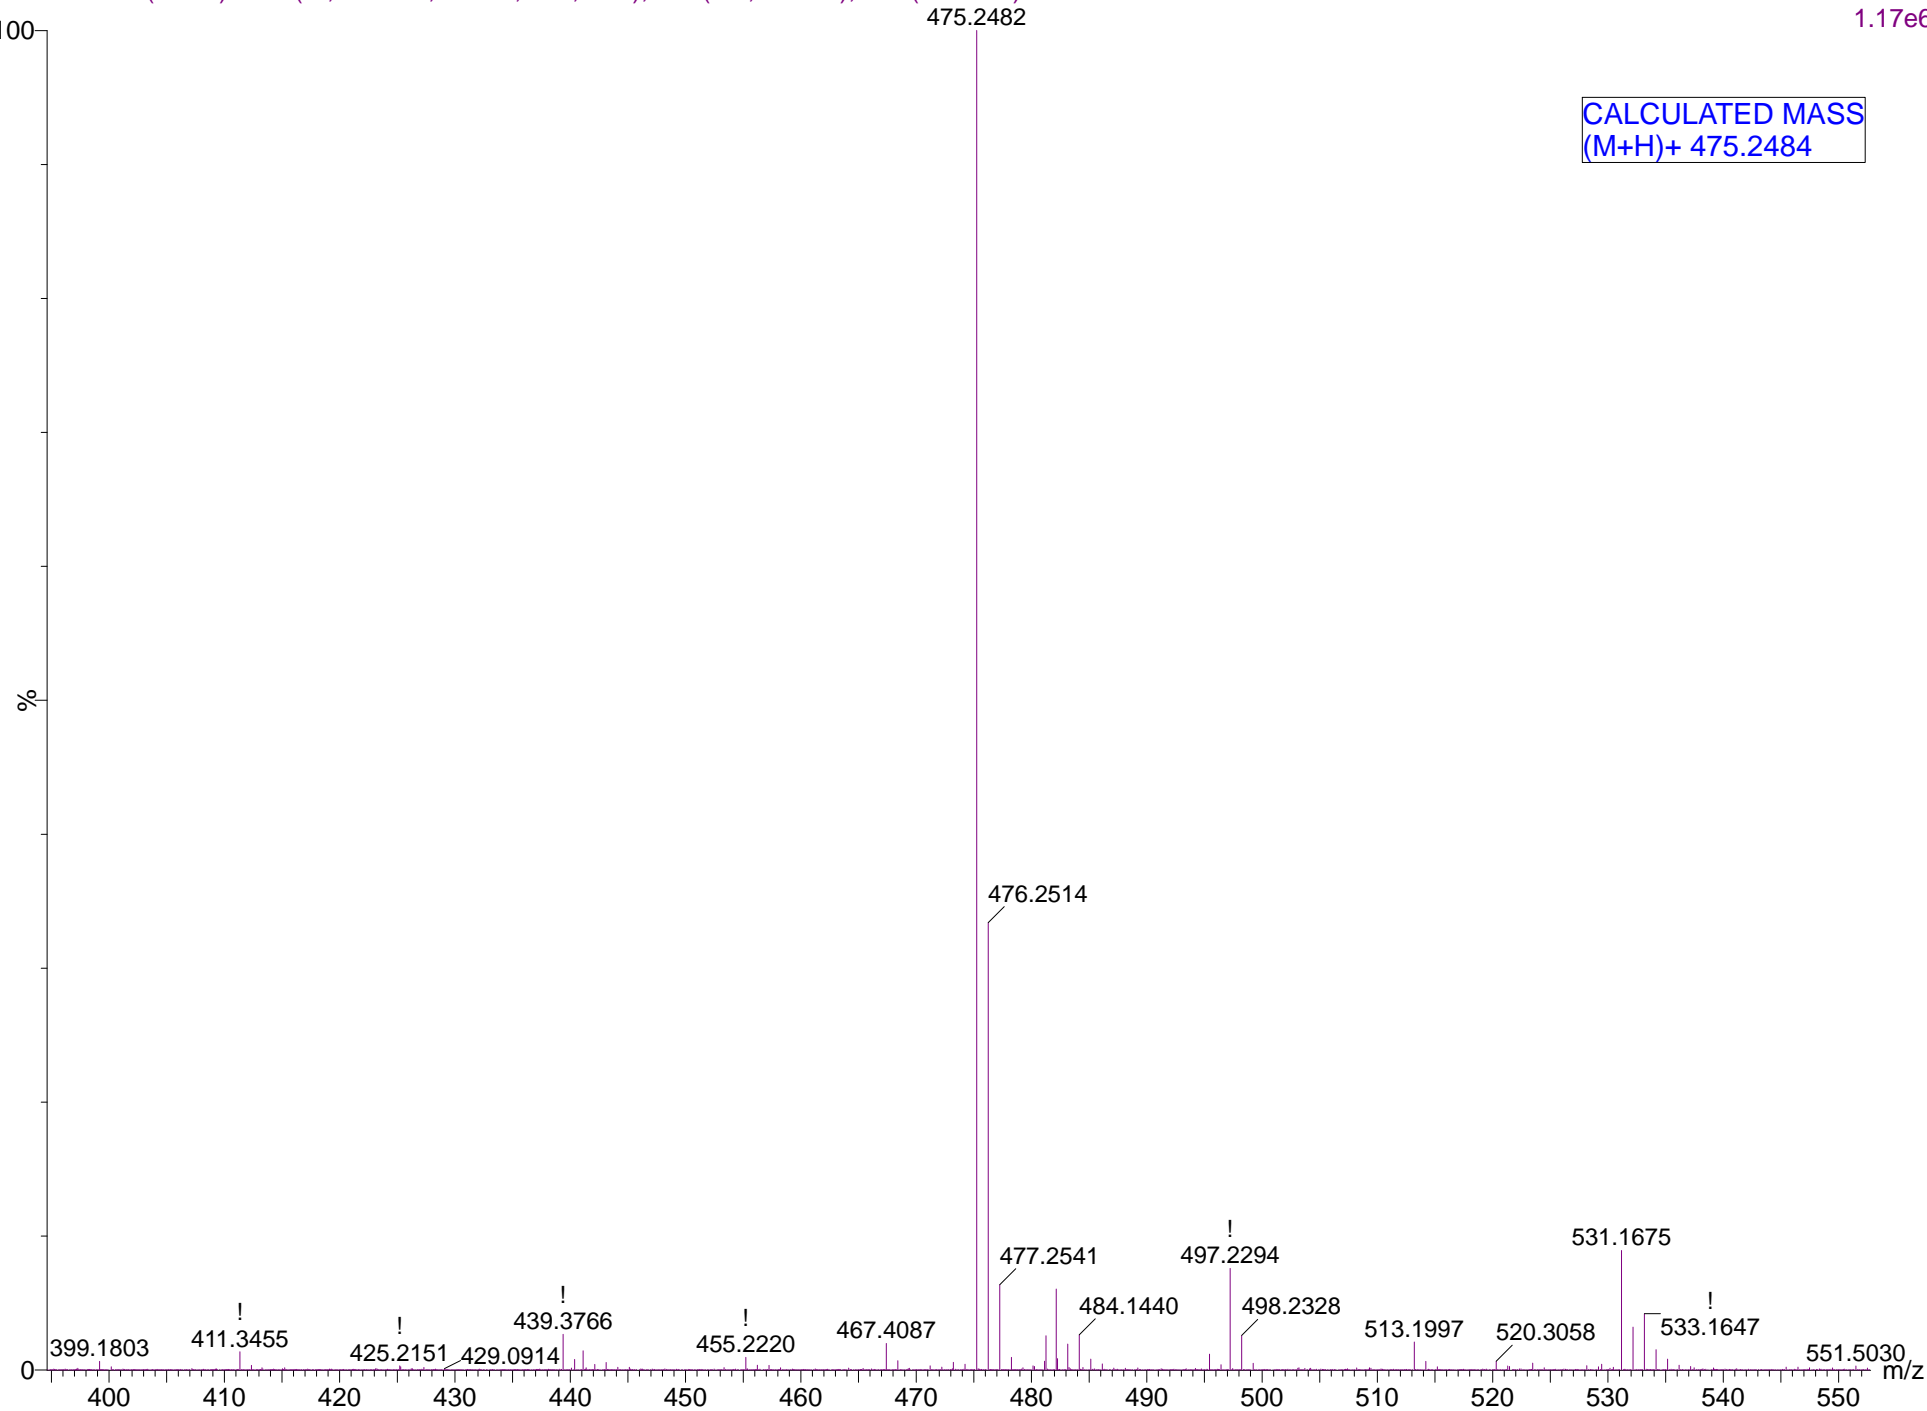

Supplement: d2re00452f1.zip [file d2re00452f1.zip]

SJM 286

IISER PUNE

SJM 286 123 (2.253) AM2 (Ar,20000.0,556.28,0.00,LS 3); Sm (SG, 3x1.00)

1: TOF MS ES+  
1.08e4

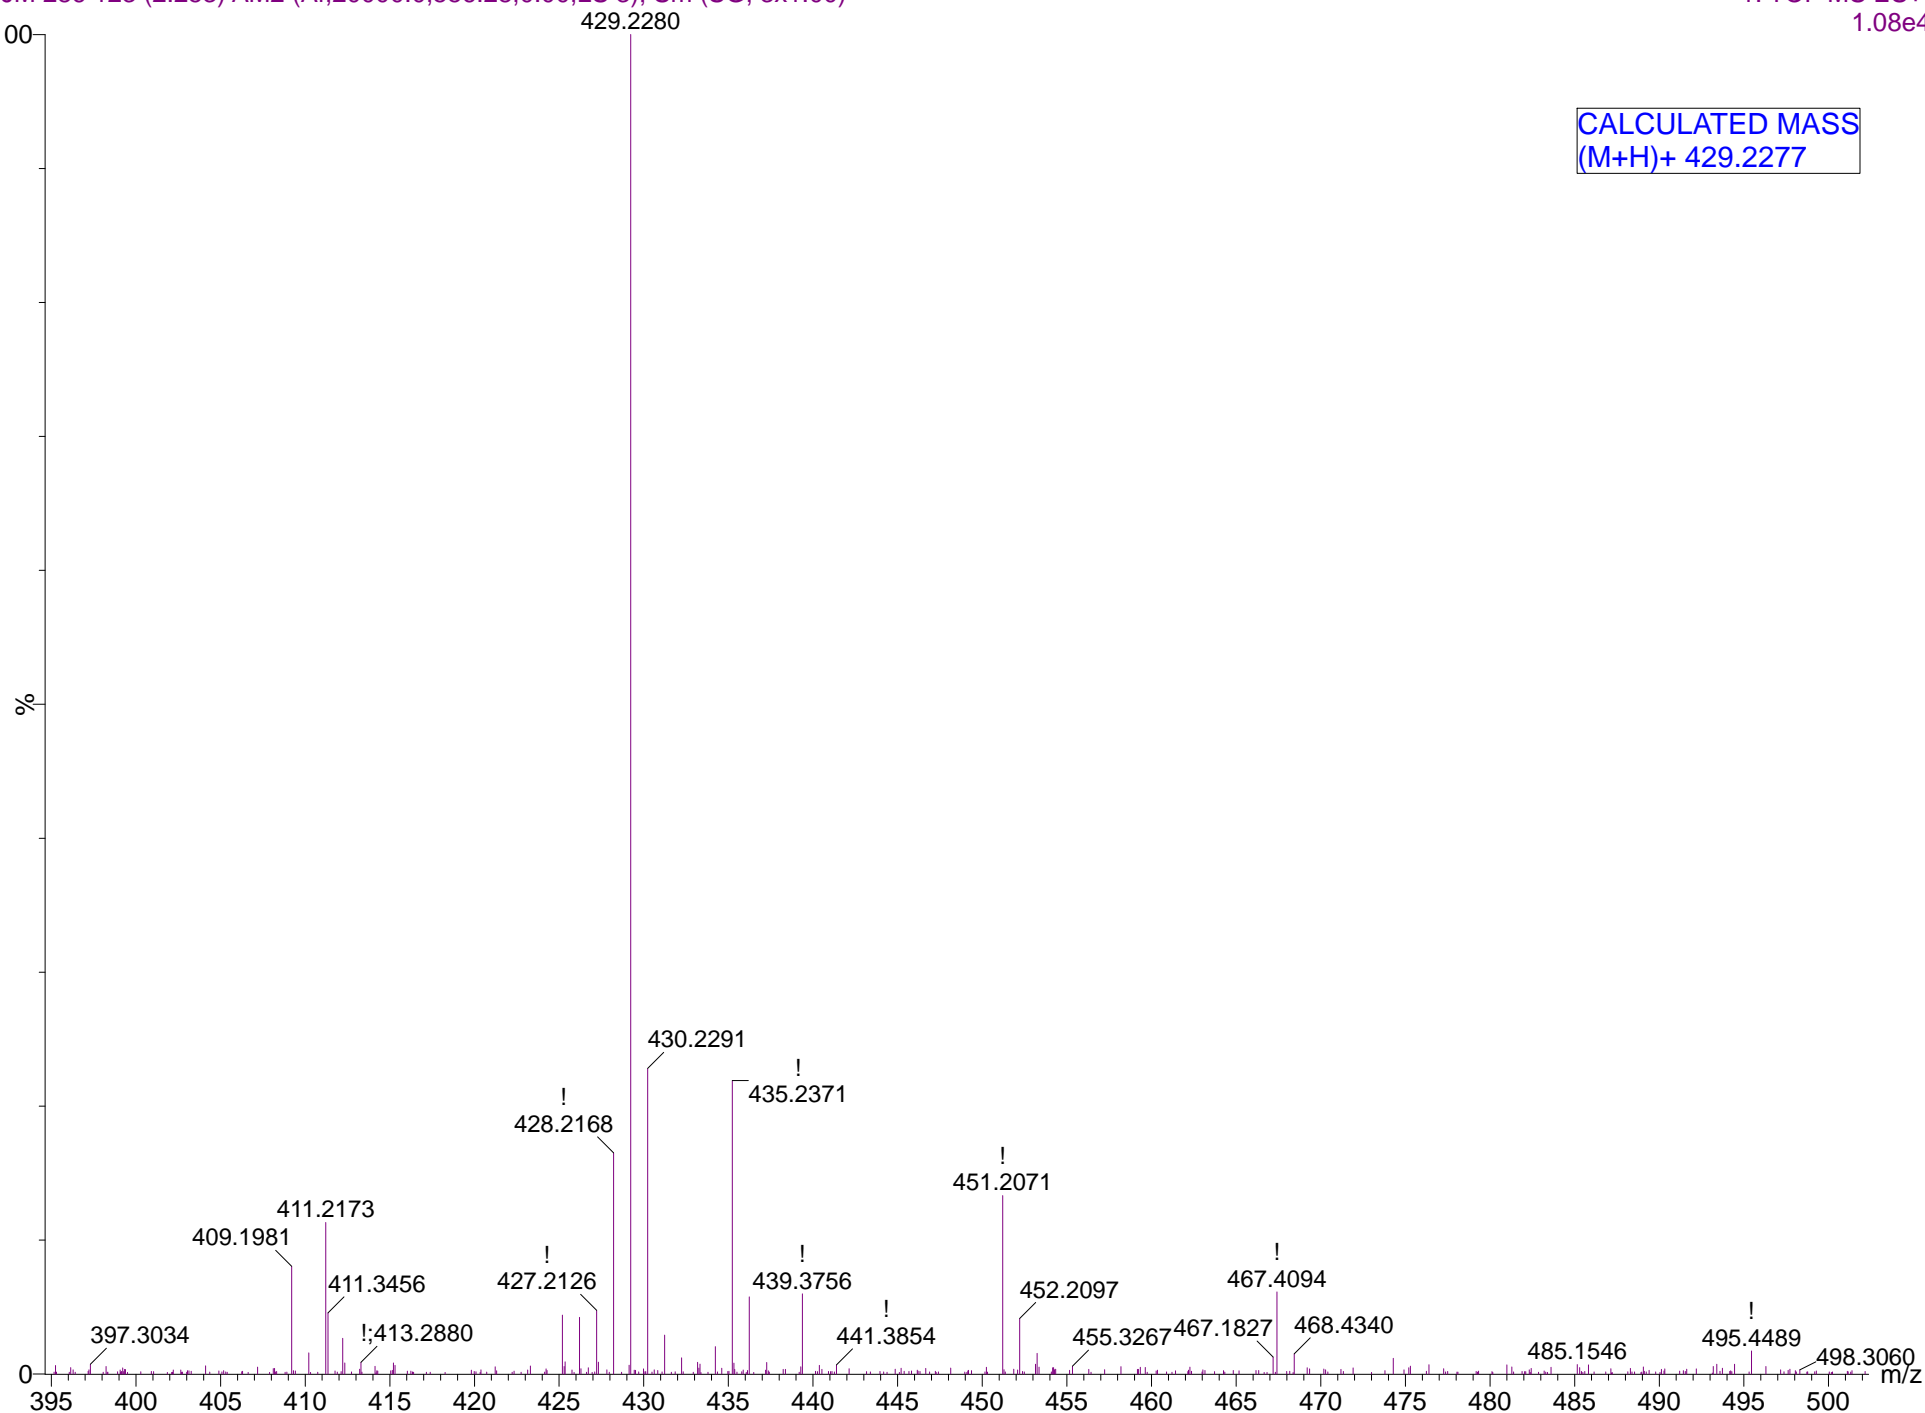

Supplement: d2re00452f1.zip [file d2re00452f1.zip]

SJM 152

IISER PUNE

SJM 152 130 (2.392) AM2 (Ar,20000.0,556.28,0.00,LS 3); ABS; Sm (SG, 3x1.00)

1: TOF MS ES+  
5.34e4

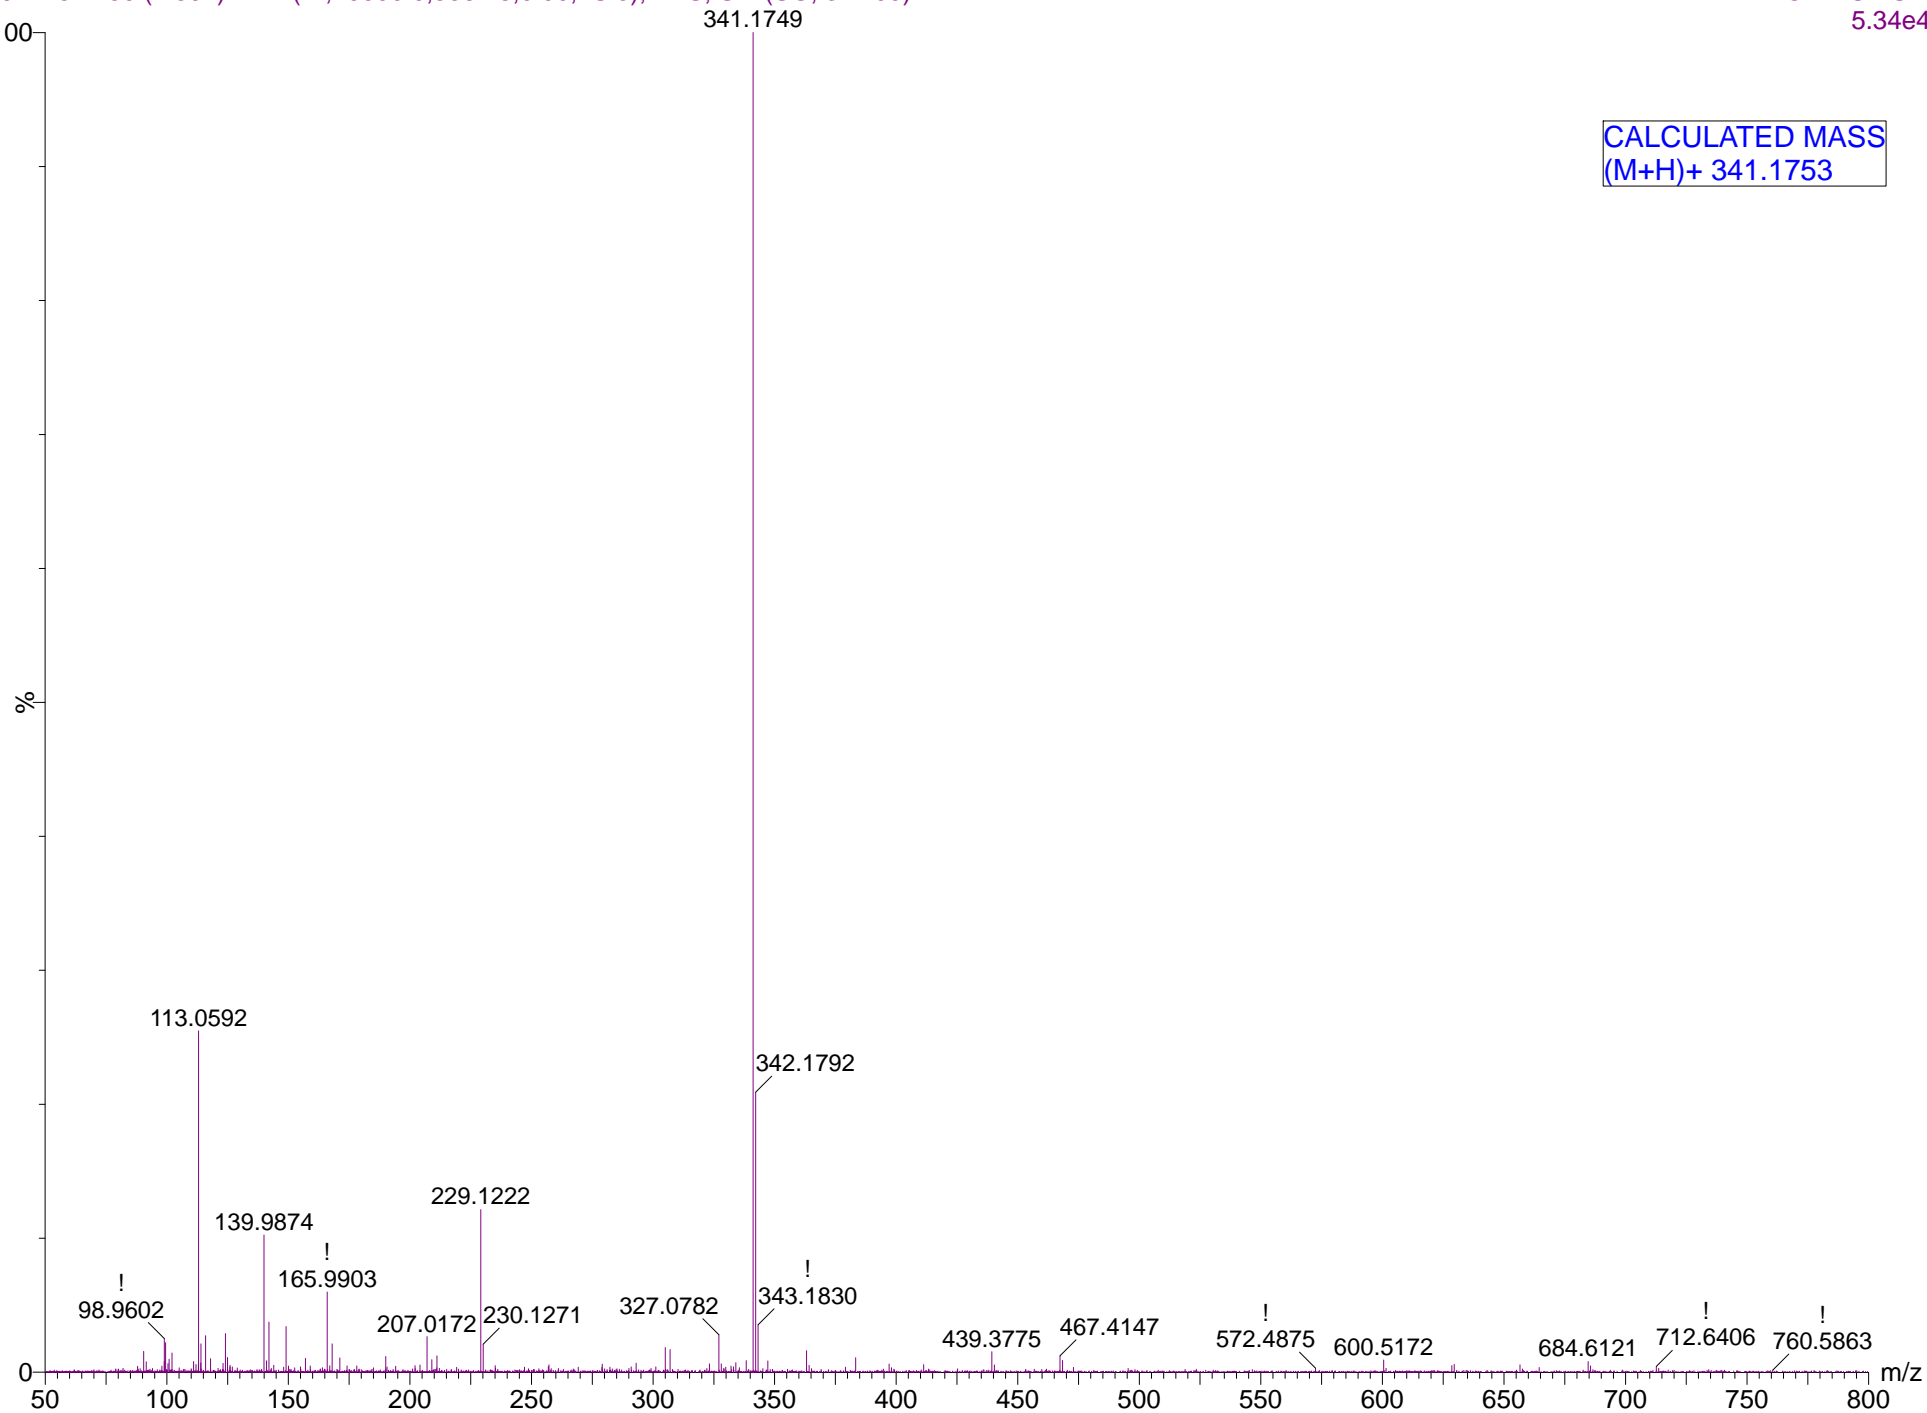

Supplement: d2re00452f1.zip [file d2re00452f1.zip]

SJM 106

IISER PUNE

SJM 106 162 (2.958) AM2 (Ar,20000.0,556.28,0.00,LS 3); ABS; Sm (SG, 3x1.00)

1: TOF MS ES+  
1.25e6

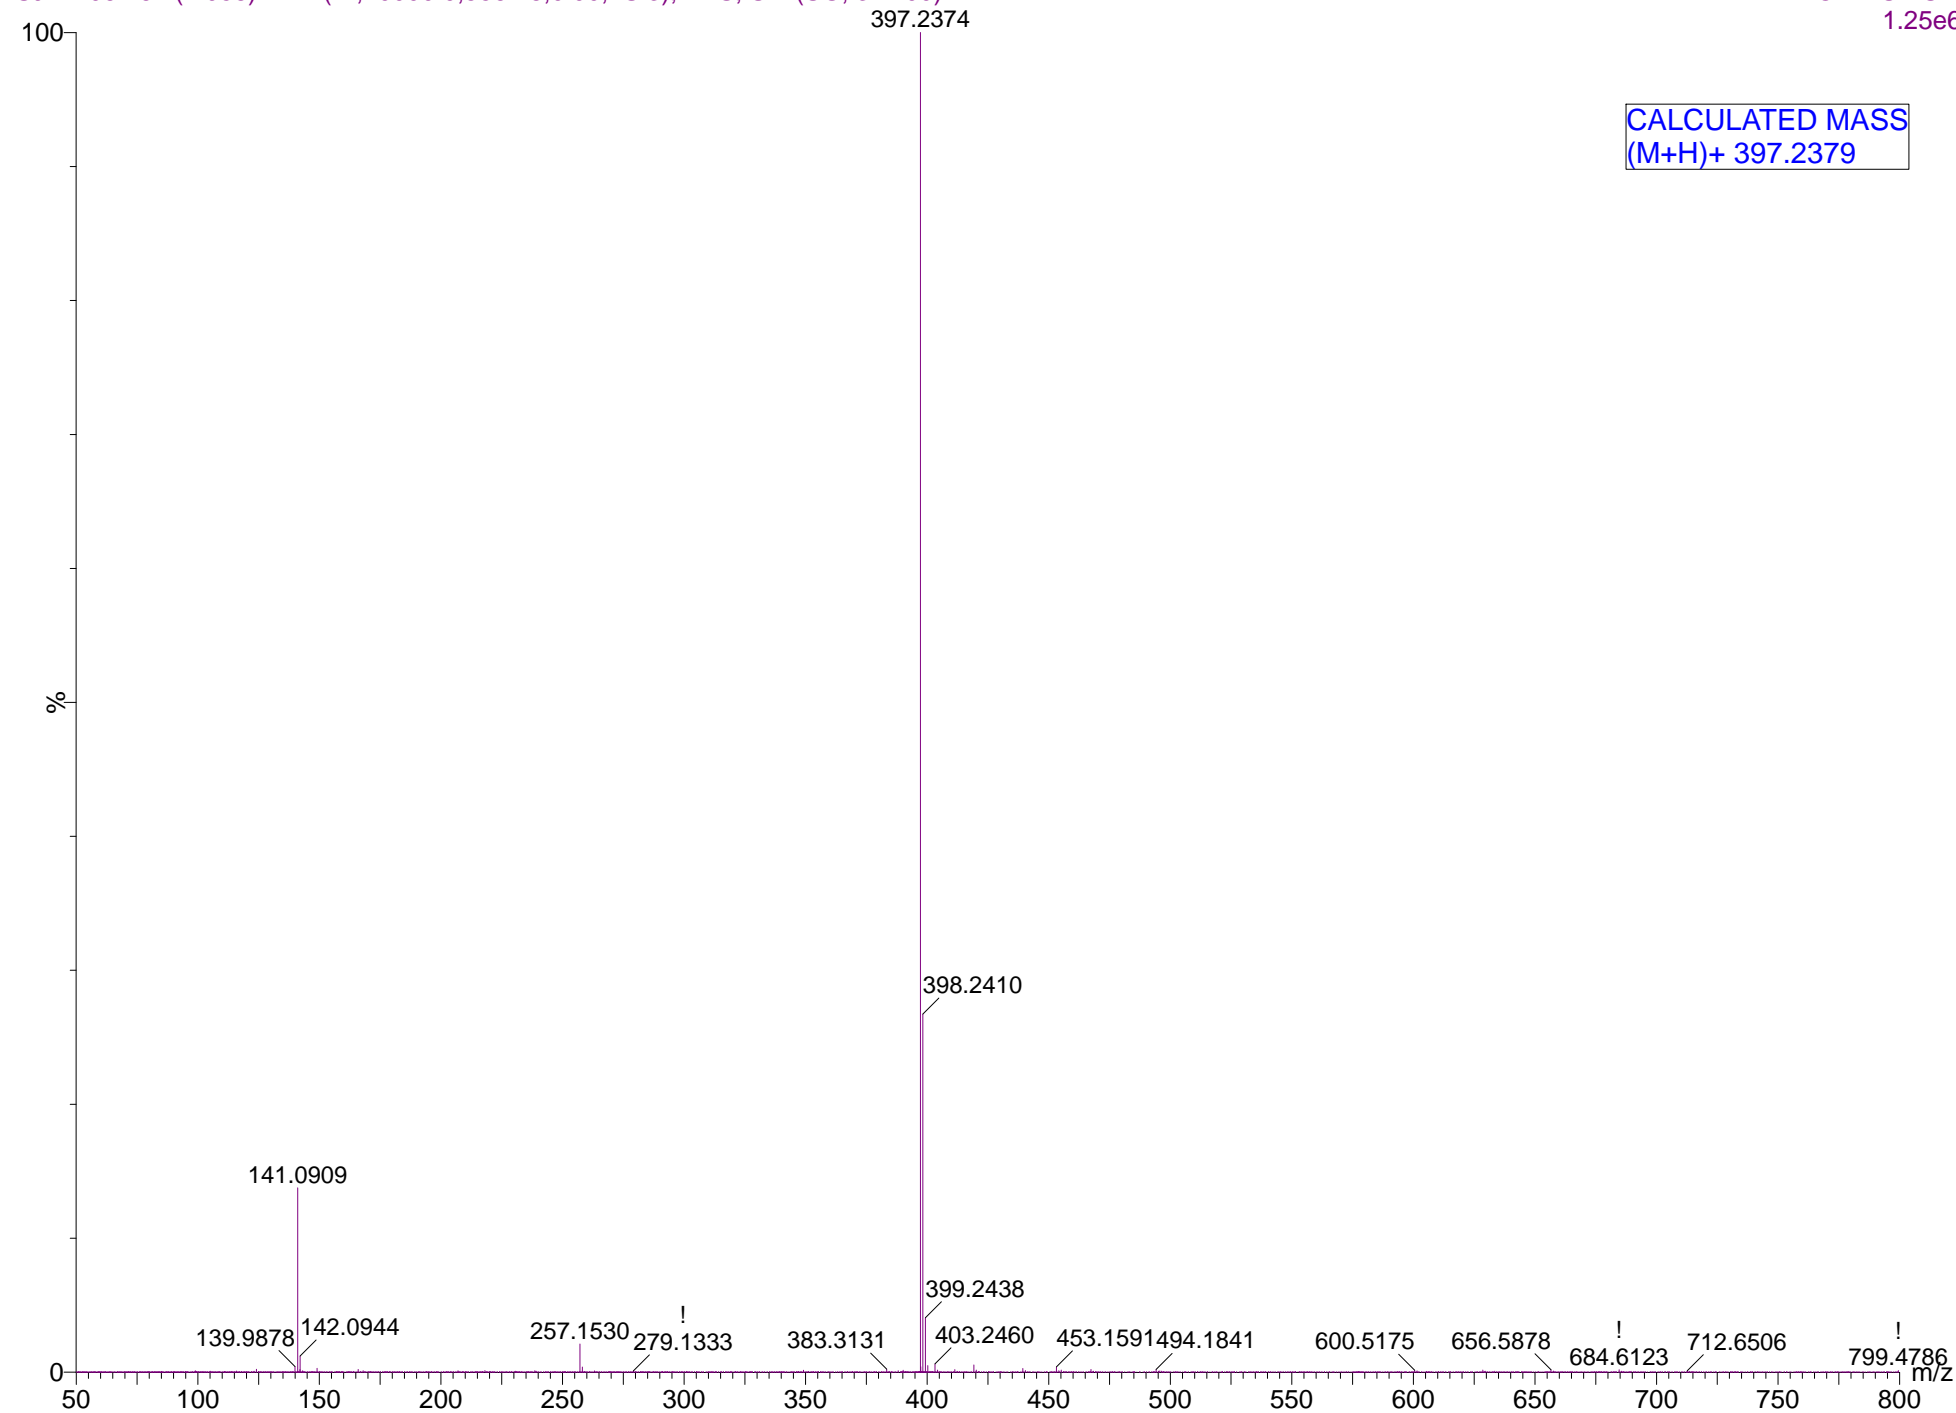

CALCULATED MASS  
(M+H)+ 397.2379

Supplement: d2re00452f1.zip [file d2re00452f1.zip]

SJM 294

IISER PUNE

SJM 294 119 (2.184) AM2 (Ar,20000.0,556.28,0.00,LS 3); Sm (SG, 3x1.00)

1: TOF MS ES+  
1.04e5

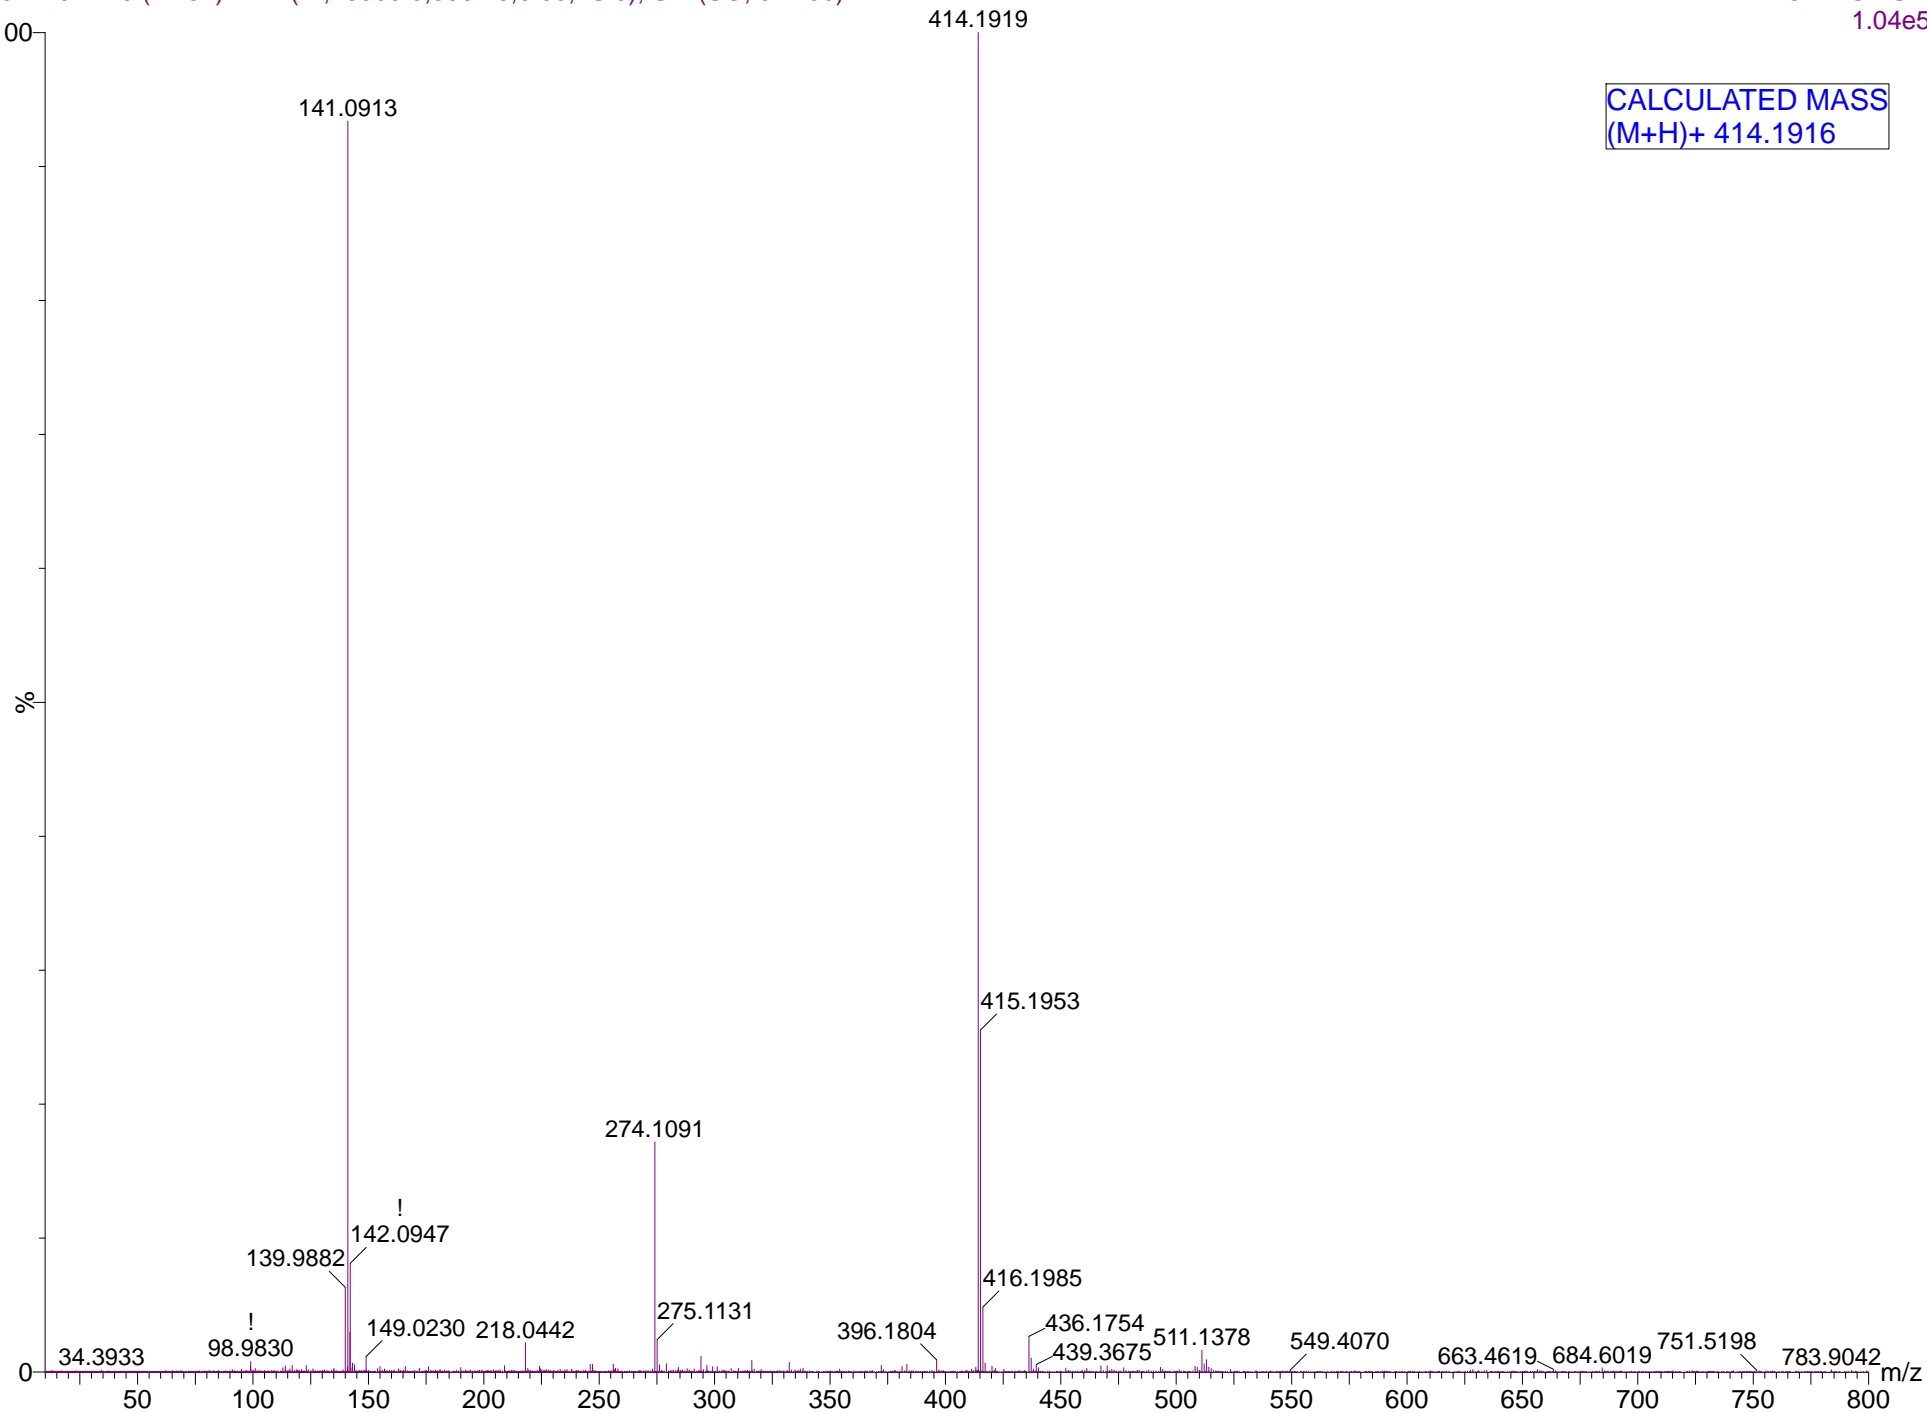

Supplement: d2re00452f1.zip [file d2re00452f1.zip]
